# Supplementary material for: The decrotonylase FoSir5 facilitates mitochondrial metabolic state switching in conidial germination of Fusarium oxysporum
Source: eLife. 2021 Dec 20;10:e75583. doi: 10.7554/eLife.75583 (PMC8730727; doi:10.7554/eLife.75583)
Supplement: Supplementary file 1. [file elife-75583-supp1.xlsx]

## Sheet: Sheet1
Accession	Peptides	Description	Coverage (%)	Score
A0A0D2Y5A7	26	E2 component of pyruvate dehydrogenase complex	74.4	323.31
A0A0D2XVM8	10	60S ribosomal protein L3	19.4	148.75
A0A0D2XDB8	5	Ribosomal protein	23	95.2
A0A0C4DHU4	7	Pyruvate decarboxylase	14.9	94.397
A0A0D2Y5D0	2	50S ribosomal protein L34e	15.5	75.955
A0A0J9WJE4	11	CTP synthase	24.1	68.533
A0A0D2X858	11	Dynamin GTPase	14.1	67.715
A0A0J9WQU1	10	Plasma membrane ATPase	16.3	66.783
A0A0D2XI35	8	Asparaginyl-tRNA synthetase	12.4	46.761
A0A0D2XUT9	7	ATP citrate synthase	13.4	43.123
A0A0D2XCF0	6	Mitochondrial import receptor subunit tom-40	20.2	43.065
