# Supplementary material for: The decrotonylase FoSir5 facilitates mitochondrial metabolic state switching in conidial germination of Fusarium oxysporum
Source: eLife. 2021 Dec 20;10:e75583. doi: 10.7554/eLife.75583 (PMC8730727; doi:10.7554/eLife.75583)
Supplement: Supplementary file 2. [file elife-75583-supp2.xlsx]

## Sheet: Sheet1
gene_id	ΔFoSIRT5_1	ΔFoSIRT5_2	ΔFoSIRT5_3	Fo_1	Fo_2	Fo_3	ΔFoSIRT5	Fo	log2FoldChange	p value	gene_description
FOXG_00233	111739	110475	122281	1820.6	1996.39	1681.36	114832	1832.78	5.96869	0	30 kDa heat shock protein [Source:BROAD_F_oxysporum;Acc:FOXG_00233]
FOXG_01626	42321.4	44253.6	41017.5	3826.74	3619.38	3752.23	42530.8	3732.79	3.51026	0	NADP-specific glutamate dehydrogenase [Source:BROAD_F_oxysporum;Acc:FOXG_01626]
FOXG_00378	29036.1	25503.9	28640.4	501.312	628.123	551.89	27726.8	560.442	5.62768	0	heat shock protein 78, mitochondrial precursor [Source:BROAD_F_oxysporum;Acc:FOXG_00378]
FOXG_07583	19798.1	19243.4	21584.8	487.039	457.194	480.977	20208.8	475.07	5.41126	0	conserved hypothetical protein [Source:BROAD_F_oxysporum;Acc:FOXG_07583]
FOXG_06292	11500.3	12755.8	11235.2	666.334	656.335	570.389	11830.4	631.019	4.22722	0	3-isopropylmalate dehydratase [Source:BROAD_F_oxysporum;Acc:FOXG_06292]
FOXG_02711	11935.5	12290.8	12028.7	1296.1	1239.65	1156.19	12085	1230.65	3.29508	0	conserved hypothetical protein [Source:BROAD_F_oxysporum;Acc:FOXG_02711]
FOXG_08361	11178	10760.1	10900.3	665.442	657.994	647.469	10946.1	656.968	4.05819	0	conserved hypothetical protein [Source:BROAD_F_oxysporum;Acc:FOXG_08361]
FOXG_04966	11851.3	11754.1	12498.4	472.767	379.197	382.315	12034.6	411.426	4.86985	0	conserved hypothetical protein [Source:BROAD_F_oxysporum;Acc:FOXG_04966]
FOXG_04369	7534.11	7343.82	7457.93	470.091	522.745	528.252	7445.28	507.029	3.87671	0	alcohol dehydrogenase 2 [Source:BROAD_F_oxysporum;Acc:FOXG_04369]
FOXG_12919	7221.04	6699.14	7817.56	74.0371	92.1026	60.6359	7245.91	75.5919	6.57066	0	conserved hypothetical protein [Source:BROAD_F_oxysporum;Acc:FOXG_12919]
FOXG_04450	5087.06	5409.79	5428.24	372.862	331.072	330.928	5308.36	344.954	3.94326	0	conserved hypothetical protein [Source:BROAD_F_oxysporum;Acc:FOXG_04450]
FOXG_11412	3149.13	3090.05	3308.64	108.826	81.3158	102.773	3182.61	97.6381	5.03196	0	conserved hypothetical protein [Source:BROAD_F_oxysporum;Acc:FOXG_11412]
FOXG_07926	4671.35	4462.05	4982.07	145.398	128.612	118.189	4705.16	130.733	5.16645	0	conserved hypothetical protein [Source:BROAD_F_oxysporum;Acc:FOXG_07926]
FOXG_02971	4100.65	4025.66	4295.39	132.91	121.974	92.4955	4140.56	115.793	5.15232	0	conserved hypothetical protein [Source:BROAD_F_oxysporum;Acc:FOXG_02971]
FOXG_08669	2082.66	2206.23	2103.86	80.2812	70.529	77.0796	2130.92	75.9633	4.81229	5.43184e-291	conserved hypothetical protein [Source:BROAD_F_oxysporum;Acc:FOXG_08669]
FOXG_11983	6558.98	6917.34	7321.94	644.034	677.909	577.583	6932.75	633.175	3.45109	3.28834e-268	hypothetical protein similar to abc transporter [Source:BROAD_F_oxysporum;Acc:FOXG_11983]
FOXG_17031	17845.8	17526.4	18799.9	603.893	609.039	867.402	18057.4	693.445	4.70474	7.03225e-265	hypothetical protein similar to myosin-crossreactive antigen [Source:BROAD_F_oxysporum;Acc:FOXG_17031]
FOXG_04346	50462.1	46532.5	50132	2727.78	2658.53	1936.24	49042.2	2440.85	4.32802	1.03305e-248	heat shock protein 81-1 [Source:BROAD_F_oxysporum;Acc:FOXG_04346]
FOXG_00795	79264.1	71960.4	80656	7265.45	7207.24	5929.99	77293.5	6800.89	3.50636	4.62968e-246	heat shock 70 kDa protein [Source:BROAD_F_oxysporum;Acc:FOXG_00795]
FOXG_07584	1629.99	1611.14	1684.66	72.2531	73.8481	72.9687	1641.93	73.0233	4.49055	8.81123e-246	hypothetical protein [Source:BROAD_F_oxysporum;Acc:FOXG_07584]
FOXG_07961	9649.61	10550.7	10507	1555.67	1572.38	1575.51	10235.7	1567.85	2.70673	4.38237e-241	conserved hypothetical protein [Source:BROAD_F_oxysporum;Acc:FOXG_07961]
novel.446	7674.73	7761.48	8904.33	646.71	741.8	608.415	8113.51	665.641	3.60602	1.21636e-235	-
FOXG_02354	2984.9	2899.4	2993.96	156.102	205.779	151.076	2959.42	170.986	4.10765	2.0918e-233	conserved hypothetical protein [Source:BROAD_F_oxysporum;Acc:FOXG_02354]
FOXG_01157	15297.1	13775.2	15583.4	2327.26	2319.99	2293.89	14885.2	2313.71	2.68555	8.37053e-221	hypothetical protein similar to bax Inhibitor family protein [Source:BROAD_F_oxysporum;Acc:FOXG_01157]
FOXG_09486	7007.54	7275.5	7429.83	334.505	336.05	212.74	7237.62	294.432	4.61512	4.88572e-216	conserved hypothetical protein [Source:BROAD_F_oxysporum;Acc:FOXG_09486]
FOXG_08333	3818.38	4026.76	3742.45	513.8	560.913	549.834	3862.53	541.516	2.83443	4.30677e-208	conserved hypothetical protein [Source:BROAD_F_oxysporum;Acc:FOXG_08333]
FOXG_01331	5493.53	5051.63	5727.18	454.927	488.725	366.899	5424.12	436.85	3.63133	3.40467e-204	conserved hypothetical protein [Source:BROAD_F_oxysporum;Acc:FOXG_01331]
FOXG_02466	6674.97	6486.45	6636.39	1220.27	1127.63	1123.31	6599.27	1157.07	2.51166	6.13749e-204	conserved hypothetical protein [Source:BROAD_F_oxysporum;Acc:FOXG_02466]
FOXG_17533	1494.5	1488.82	1659.94	24.0844	18.2546	15.4159	1547.75	19.2516	6.31945	6.86621e-195	conserved hypothetical protein [Source:BROAD_F_oxysporum;Acc:FOXG_17533]
FOXG_05048	7534.11	7078.24	7601.78	1211.35	1139.25	1049.31	7404.71	1133.31	2.70722	5.42489e-194	peptidyl-prolyl cis-trans isomerase D [Source:BROAD_F_oxysporum;Acc:FOXG_05048]
FOXG_13646	3871.75	3950.72	3975.09	528.964	497.852	428.563	3932.52	485.126	3.01697	1.49357e-190	conserved hypothetical protein [Source:BROAD_F_oxysporum;Acc:FOXG_13646]
FOXG_10698	2539.42	2382.55	2899.56	173.051	127.782	163.409	2607.18	154.747	4.07793	3.35955e-190	thioredoxin [Source:BROAD_F_oxysporum;Acc:FOXG_10698]
FOXG_01731	17487.5	17210.2	18686.4	3840.12	3711.49	3765.6	17794.7	3772.4	2.2379	1.16926e-184	hypothetical protein similar to NF-X1 finger transcription factor [Source:BROAD_F_oxysporum;Acc:FOXG_01731]
FOXG_05140	61193.6	60471.9	68358.7	12370.4	12313.5	11950.4	63341.4	12211.5	2.37488	2.5627e-180	hypothetical protein [Source:BROAD_F_oxysporum;Acc:FOXG_05140]
FOXG_01066	1274.84	1693.8	1465.51	22.3003	18.2546	24.6655	1478.05	21.7401	6.09823	1.07497e-171	conserved hypothetical protein [Source:BROAD_F_oxysporum;Acc:FOXG_01066]
FOXG_10360	1505.79	1464.58	1537.44	156.102	141.888	166.492	1502.6	154.827	3.28249	1.31434e-170	hypothetical protein similar to alpha-ketoglutarate dependent xanthine dioxygenase [Source:BROAD_F_oxysporum;Acc:FOXG_10360]
FOXG_03265	2922.29	2636.02	2739.97	346.993	389.154	329.901	2766.09	355.349	2.95838	1.21192e-169	conserved hypothetical protein [Source:BROAD_F_oxysporum;Acc:FOXG_03265]
FOXG_08530	16836.8	16996.4	18227.9	3506.51	3742.19	3789.23	17353.7	3679.31	2.23779	7.25797e-168	hypothetical protein similar to pyrimidine 5'-nucleotidase [Source:BROAD_F_oxysporum;Acc:FOXG_08530]
FOXG_10469	7633.67	7329.49	7870.38	883.985	921.856	693.716	7611.18	833.186	3.18974	1.31333e-167	conserved hypothetical protein [Source:BROAD_F_oxysporum;Acc:FOXG_10469]
FOXG_10286	2033.39	2284.47	2446.64	200.703	224.033	177.797	2254.83	200.844	3.48475	1.3981e-164	conserved hypothetical protein [Source:BROAD_F_oxysporum;Acc:FOXG_10286]
FOXG_01248	1916.37	2272.35	2300.54	223.895	225.693	206.573	2163.09	218.721	3.30403	2.26709e-163	conserved hypothetical protein [Source:BROAD_F_oxysporum;Acc:FOXG_01248]
FOXG_08416	2686.21	2863.03	2802.9	450.467	391.644	439.868	2784.05	427.326	2.70499	1.80475e-161	D-amino-acid oxidase [Source:BROAD_F_oxysporum;Acc:FOXG_08416]
FOXG_10792	3042.38	2721.97	3140.06	431.735	453.045	411.091	2968.14	431.957	2.77939	4.89251e-157	conserved hypothetical protein [Source:BROAD_F_oxysporum;Acc:FOXG_10792]
FOXG_05288	80427.1	85558.2	79416.3	19779.5	19774.7	18380.9	81800.5	19311.7	2.08259	6.05406e-156	ketol-acid reductoisomerase, mitochondrial precursor [Source:BROAD_F_oxysporum;Acc:FOXG_05288]
FOXG_01827	1588.94	1343.35	1502.6	115.962	127.782	139.771	1478.3	127.838	3.53459	2.05405e-155	conserved hypothetical protein [Source:BROAD_F_oxysporum;Acc:FOXG_01827]
FOXG_15359	1224.55	1332.33	1346.38	87.4173	84.6349	55.4973	1301.09	75.8498	4.08874	1.56157e-152	hypothetical protein similar to transcriptional regulator [Source:BROAD_F_oxysporum;Acc:FOXG_15359]
FOXG_15693	917.642	953.242	1021.59	55.3048	46.4662	38.0259	964.157	46.599	4.36258	4.47404e-150	conserved hypothetical protein [Source:BROAD_F_oxysporum;Acc:FOXG_15693]
FOXG_11354	2409.07	2181.99	2524.19	330.045	357.624	363.816	2371.75	350.495	2.75902	9.45806e-145	conserved hypothetical protein [Source:BROAD_F_oxysporum;Acc:FOXG_11354]
FOXG_09194	2480.92	2449.78	2708.5	302.393	372.559	358.677	2546.4	344.543	2.88565	9.69005e-144	hypothetical protein similar to dimethylaniline monooxygenase [Source:BROAD_F_oxysporum;Acc:FOXG_09194]
FOXG_17185	2554.82	2384.76	2745.59	202.487	237.309	289.819	2561.72	243.205	3.40049	1.09693e-141	predicted protein [Source:BROAD_F_oxysporum;Acc:FOXG_17185]
FOXG_11588	1118.82	1119.65	1114.87	130.234	131.101	140.799	1117.78	134.045	3.06197	1.47127e-140	conserved hypothetical protein [Source:BROAD_F_oxysporum;Acc:FOXG_11588]
FOXG_07996	12342	11567.8	11847.7	2714.4	2747.31	2423.38	11919.2	2628.36	2.18063	3.74245e-139	heat shock protein 60, mitochondrial precursor [Source:BROAD_F_oxysporum;Acc:FOXG_07996]
FOXG_03560	7329.84	8013.85	7650.11	1513.75	1635.44	1398.74	7664.6	1515.98	2.33718	1.93375e-138	conserved hypothetical protein [Source:BROAD_F_oxysporum;Acc:FOXG_03560]
FOXG_13568	1063.4	1040.3	1096.89	8.92014	13.2761	10.2773	1066.86	10.8245	6.61245	7.57095e-137	conserved hypothetical protein [Source:BROAD_F_oxysporum;Acc:FOXG_13568]
FOXG_13642	53844.2	52851.5	55519.7	14393.5	14716.5	15558.8	54071.8	14889.6	1.86062	9.67326e-136	glutamyl-tRNA synthetase [Source:BROAD_F_oxysporum;Acc:FOXG_13642]
FOXG_17532	1069.56	1000.63	1146.34	23.1924	49.7852	28.7764	1072.17	33.918	4.96551	3.46269e-134	conserved hypothetical protein [Source:BROAD_F_oxysporum;Acc:FOXG_17532]
FOXG_05529	2440.89	2297.7	2511.82	303.285	333.561	387.453	2416.8	341.433	2.82599	8.52041e-134	isocitrate lyase [Source:BROAD_F_oxysporum;Acc:FOXG_05529]
FOXG_14277	107.777	110.201	102.271	1389.76	1276.16	1687.53	106.75	1451.15	-3.76376	1.02851e-131	conserved hypothetical protein [Source:BROAD_F_oxysporum;Acc:FOXG_14277]
FOXG_17534	817.05	910.264	822.664	17.8403	18.2546	9.24955	849.993	15.1148	5.78568	9.26774e-130	hypothetical protein similar to MFS sugar transporter [Source:BROAD_F_oxysporum;Acc:FOXG_17534]
FOXG_00220	1617.68	1550.53	1677.92	85.6333	92.1026	142.854	1615.38	106.863	3.92853	2.30661e-129	conserved hypothetical protein [Source:BROAD_F_oxysporum;Acc:FOXG_00220]
FOXG_09337	1992.33	2298.8	2145.45	240.844	243.948	175.741	2145.53	220.178	3.27964	3.45249e-129	4-aminobutyrate aminotransferase [Source:BROAD_F_oxysporum;Acc:FOXG_09337]
FOXG_05677	1369.28	1286.05	1274.46	79.3892	86.2944	126.411	1309.93	97.3647	3.76053	5.19203e-127	conserved hypothetical protein [Source:BROAD_F_oxysporum;Acc:FOXG_05677]
FOXG_02785	21944.4	22986.9	22504.1	4881.99	5269.76	5710.06	22478.5	5287.27	2.08812	5.21461e-126	hypothetical protein similar to aromatic and neutral aliphatic amino acid permease [Source:BROAD_F_oxysporum;Acc:FOXG_02785]
FOXG_04267	1077.77	1027.08	1136.22	128.45	139.399	119.216	1080.36	129.022	3.06201	8.88513e-125	hypothetical protein similar to nitroreductase family protein [Source:BROAD_F_oxysporum;Acc:FOXG_04267]
FOXG_11511	1420.6	1290.46	1435.17	167.699	153.504	195.268	1382.08	172.157	3.01003	2.96639e-123	uricase [Source:BROAD_F_oxysporum;Acc:FOXG_11511]
FOXG_13044	30290.4	29273.9	33471.9	183.755	199.141	87.3569	31012.1	156.751	7.62521	5.20696e-123	conserved hypothetical protein [Source:BROAD_F_oxysporum;Acc:FOXG_13044]
FOXG_03747	17065.7	15995.7	17404.1	3083.69	3309.06	3757.37	16821.8	3383.37	2.31413	9.9668e-123	conserved hypothetical protein [Source:BROAD_F_oxysporum;Acc:FOXG_03747]
FOXG_01570	3312.34	3027.23	3603.09	369.294	370.07	257.96	3314.22	332.441	3.31407	8.0615e-121	conserved hypothetical protein [Source:BROAD_F_oxysporum;Acc:FOXG_01570]
FOXG_08681	2796.04	2500.47	2714.12	578.917	581.657	587.86	2670.21	582.811	2.1961	5.2539e-119	glycerol-3-phosphate dehydrogenase [Source:BROAD_F_oxysporum;Acc:FOXG_08681]
FOXG_03463	908.404	846.347	1032.83	82.9573	75.5076	87.3569	929.192	81.9406	3.50687	1.3749e-117	homogentisate 1,2-dioxygenase [Source:BROAD_F_oxysporum;Acc:FOXG_03463]
FOXG_13752	33640.7	30227.1	33673.1	3117.59	3094.15	4427.45	32513.6	3546.4	3.19702	1.39699e-117	Flavohemoglobin [Source:UniProtKB/TrEMBL;Acc:O74183]
FOXG_07989	2758.06	2757.24	2857.97	715.395	648.037	683.439	2791.09	682.29	2.0327	1.21679e-111	hypothetical protein similar to YdiU domain protein [Source:BROAD_F_oxysporum;Acc:FOXG_07989]
FOXG_07697	6525.11	6871.06	6517.26	1584.22	1404.77	1658.75	6637.81	1549.25	2.09986	1.70907e-111	allantoicase [Source:BROAD_F_oxysporum;Acc:FOXG_07697]
FOXG_07915	718.511	678.841	646.219	51.7368	48.9555	58.5805	681.19	53.0909	3.68798	2.09518e-111	Lcc3 [Source:UniProtKB/TrEMBL;Acc:A7LBK9]
FOXG_07982	1265.61	1385.23	1319.41	239.06	247.267	220.962	1323.42	235.763	2.48653	6.37725e-108	conserved hypothetical protein [Source:BROAD_F_oxysporum;Acc:FOXG_07982]
FOXG_12915	11522.9	10979.4	11778	3642.98	3482.48	3525.11	11426.8	3550.19	1.68646	3.89135e-107	arginase [Source:BROAD_F_oxysporum;Acc:FOXG_12915]
FOXG_00460	3879.96	3782.11	3780.66	1006.19	1076.19	965.037	3814.24	1015.81	1.90795	1.37591e-106	conserved hypothetical protein [Source:BROAD_F_oxysporum;Acc:FOXG_00460]
FOXG_10750	413.657	469.458	465.277	2252.33	2066.92	2298	449.464	2205.75	-2.29551	3.23972e-105	hypothetical protein similar to alkaline foam protein B precursor [Source:BROAD_F_oxysporum;Acc:FOXG_10750]
FOXG_06224	4185.84	3925.37	4016.67	924.126	1053.79	907.484	4042.63	961.799	2.07056	1.55616e-103	hypothetical protein [Source:BROAD_F_oxysporum;Acc:FOXG_06224]
FOXG_06223	2897.65	2966.62	3108.59	819.76	829.753	812.933	2990.96	820.816	1.86517	4.04372e-103	conserved hypothetical protein [Source:BROAD_F_oxysporum;Acc:FOXG_06223]
FOXG_08509	2896.63	3129.72	3591.85	627.978	618.166	567.306	3206.07	604.483	2.40606	9.61823e-102	hypothetical protein similar to endoribonuclease L-PSP [Source:BROAD_F_oxysporum;Acc:FOXG_08509]
FOXG_02874	544.016	535.579	599.017	33.8965	31.5306	24.6655	559.537	30.0309	4.20975	8.46132e-101	predicted protein [Source:BROAD_F_oxysporum;Acc:FOXG_02874]
FOXG_10402	1190.68	1250.79	1323.91	177.511	180.886	131.549	1255.12	163.315	2.936	1.32446e-100	conserved hypothetical protein [Source:BROAD_F_oxysporum;Acc:FOXG_10402]
FOXG_04266	4183.79	4042.19	4153.78	907.178	978.279	780.045	4126.59	888.501	2.21401	1.55189e-100	conserved hypothetical protein [Source:BROAD_F_oxysporum;Acc:FOXG_04266]
FOXG_09887	1816.81	1543.92	1809.41	223.895	223.204	284.681	1723.38	243.927	2.82462	1.88463e-100	hypothetical protein similar to major facilitator superfamily protein superfamily [Source:BROAD_F_oxysporum;Acc:FOXG_09887]
FOXG_09637	602.523	559.823	641.723	16.0562	14.1058	7.1941	601.357	12.452	5.5664	1.78044e-99	hypothetical protein [Source:BROAD_F_oxysporum;Acc:FOXG_09637]
FOXG_08558	2557.9	2541.24	2759.07	656.522	585.806	647.469	2619.41	629.932	2.05673	6.57162e-99	conserved hypothetical protein [Source:BROAD_F_oxysporum;Acc:FOXG_08558]
FOXG_05153	1481.16	1314.7	1438.54	168.591	171.759	229.183	1411.47	189.844	2.89981	4.59153e-98	hypothetical protein [Source:BROAD_F_oxysporum;Acc:FOXG_05153]
FOXG_08699	9901.09	10040.4	10244	2441.44	2761.42	2876.61	10061.8	2693.16	1.90174	5.60574e-98	hypothetical protein similar to branched-chain amino acid aminotransferase [Source:BROAD_F_oxysporum;Acc:FOXG_08699]
FOXG_08439	1464.74	1397.35	1467.76	326.477	283.776	281.597	1443.28	297.283	2.27882	7.15897e-95	conserved hypothetical protein [Source:BROAD_F_oxysporum;Acc:FOXG_08439]
FOXG_08308	1330.27	1336.74	1329.52	313.989	286.265	283.653	1332.18	294.636	2.17624	5.50378e-94	conserved hypothetical protein [Source:BROAD_F_oxysporum;Acc:FOXG_08308]
FOXG_08211	1401.1	1252.99	1355.37	280.092	250.586	271.32	1336.49	267.333	2.32292	7.47131e-94	hypothetical protein similar to endoglucanase B [Source:BROAD_F_oxysporum;Acc:FOXG_08211]
FOXG_11189	257.638	245.749	294.451	1913.37	1730.87	2329.86	265.946	1991.36	-2.90448	1.10963e-93	NAD(P)H-dependent D-xylose reductase [Source:BROAD_F_oxysporum;Acc:FOXG_11189]
FOXG_14704	646.66	674.433	672.067	34.7885	37.3389	62.6914	664.387	44.9396	3.90474	7.50618e-93	conserved hypothetical protein [Source:BROAD_F_oxysporum;Acc:FOXG_14704]
FOXG_09346	4278.22	4269.2	4367.31	1190.84	1160.83	1006.15	4304.91	1119.27	1.94241	1.90609e-92	ornithine aminotransferase [Source:BROAD_F_oxysporum;Acc:FOXG_09346]
FOXG_10336	569.677	522.355	650.714	19.6243	31.5306	16.4436	580.915	22.5329	4.6656	2.51408e-92	conserved hypothetical protein [Source:BROAD_F_oxysporum;Acc:FOXG_10336]
FOXG_14206	473.191	457.336	503.489	24.9764	20.7438	17.4714	478.005	21.0639	4.49581	4.18221e-91	conserved hypothetical protein [Source:BROAD_F_oxysporum;Acc:FOXG_14206]
FOXG_12765	8003.19	7551	7786.09	2094.45	2044.51	1730.69	7780.09	1956.55	1.99086	4.64504e-91	conserved hypothetical protein [Source:BROAD_F_oxysporum;Acc:FOXG_12765]
FOXG_12668	7389.38	7476.06	8207.54	1251.5	1515.96	1063.7	7690.99	1277.05	2.58927	1.45743e-90	tryptophan synthase [Source:BROAD_F_oxysporum;Acc:FOXG_12668]
FOXG_09794	4127.34	4252.67	4087.47	1028.49	969.152	804.711	4155.83	934.118	2.15223	2.7957e-88	hypothetical protein similar to D-mannonate oxidoreductase [Source:BROAD_F_oxysporum;Acc:FOXG_09794]
FOXG_07890	1028.5	969.772	1053.06	149.858	182.546	135.66	1017.11	156.021	2.69921	6.18258e-87	conserved hypothetical protein [Source:BROAD_F_oxysporum;Acc:FOXG_07890]
FOXG_00152	1447.29	1437.03	1600.37	4990.82	4805.1	5106.78	1494.9	4967.57	-1.73261	9.27371e-87	oligo-1,6-glucosidase [Source:BROAD_F_oxysporum;Acc:FOXG_00152]
FOXG_01040	1805.52	1839.26	1925.17	513.8	489.555	465.561	1856.65	489.638	1.92194	3.23472e-86	conserved hypothetical protein [Source:BROAD_F_oxysporum;Acc:FOXG_01040]
FOXG_08135	1183.49	1260.7	1455.4	197.135	235.65	209.656	1299.86	214.147	2.59992	3.58924e-86	hypothetical protein similar to 2-haloalkanoic acid dehalogenase [Source:BROAD_F_oxysporum;Acc:FOXG_08135]
FOXG_04214	4524.57	4704.5	4649.4	817.084	844.689	582.722	4626.16	748.165	2.62656	1.04967e-85	conserved hypothetical protein [Source:BROAD_F_oxysporum;Acc:FOXG_04214]
FOXG_11552	2237.65	2227.17	2353.36	520.936	575.019	618.692	2272.73	571.549	1.99253	1.50873e-85	hypothetical protein [Source:BROAD_F_oxysporum;Acc:FOXG_11552]
FOXG_03025	22358	21988.5	24345	5749.03	5670.54	6724.42	22897.2	6048	1.92085	1.80445e-85	hypothetical protein similar to ubiquitin B [Source:BROAD_F_oxysporum;Acc:FOXG_03025]
FOXG_17419	561.465	596.19	660.829	50.8448	42.3174	64.7469	606.161	52.6364	3.53773	2.94942e-85	hypothetical protein [Source:BROAD_F_oxysporum;Acc:FOXG_17419]
FOXG_10414	1408.28	1344.46	1531.82	257.792	311.987	282.625	1428.19	284.135	2.3284	4.14309e-85	conserved hypothetical protein [Source:BROAD_F_oxysporum;Acc:FOXG_10414]
FOXG_13686	2109.34	2415.61	2399.44	556.616	476.278	466.588	2308.13	499.828	2.20648	2.16079e-84	hypothetical protein similar to 4-carboxymuconolactone decarboxylase [Source:BROAD_F_oxysporum;Acc:FOXG_13686]
FOXG_10045	924.827	866.183	933.926	66.901	69.6993	114.078	908.312	83.5594	3.45466	3.36973e-84	predicted protein [Source:BROAD_F_oxysporum;Acc:FOXG_10045]
FOXG_16888	586.1	592.883	770.967	26.7604	34.8496	48.3032	649.984	36.6378	4.16171	3.39881e-84	conserved hypothetical protein [Source:BROAD_F_oxysporum;Acc:FOXG_16888]
FOXG_05678	603.55	541.089	540.576	49.9528	32.3604	53.4419	561.738	45.2517	3.6471	2.49375e-82	conserved hypothetical protein [Source:BROAD_F_oxysporum;Acc:FOXG_05678]
FOXG_05931	1791.15	2093.83	1953.27	325.585	316.136	413.147	1946.08	351.623	2.47147	9.10926e-82	conserved hypothetical protein [Source:BROAD_F_oxysporum;Acc:FOXG_05931]
FOXG_13089	527.593	498.11	478.764	7.13611	8.29753	9.24955	501.489	8.22773	5.93692	1.8054e-81	predicted protein [Source:BROAD_F_oxysporum;Acc:FOXG_13089]
FOXG_01024	12385.1	12041.7	13225.6	4071.15	4182.79	4412.04	12550.8	4221.99	1.57192	2.3234e-81	conserved hypothetical protein [Source:BROAD_F_oxysporum;Acc:FOXG_01024]
novel.429	4487.62	4427.89	4471.83	1509.29	1594.79	1592.98	4462.45	1565.68	1.51113	4.2679e-81	PF12855:ECL1/2/3 zinc binding proteins
FOXG_03111	860.161	741.655	839.522	115.07	138.569	113.05	813.78	122.23	2.73118	1.14862e-80	conserved hypothetical protein [Source:BROAD_F_oxysporum;Acc:FOXG_03111]
FOXG_13660	7084.52	6716.77	7009.51	2337.97	2258.59	2489.16	6936.93	2361.9	1.55478	9.06153e-80	hypothetical protein similar to branched-chain amino acid aminotransferase [Source:BROAD_F_oxysporum;Acc:FOXG_13660]
FOXG_12350	17505	17176	19763.1	3471.72	3311.55	4380.18	18148	3721.15	2.28635	1.71784e-79	cytochrome P450 55A1 [Source:BROAD_F_oxysporum;Acc:FOXG_12350]
FOXG_03139	26965.7	25401.4	27113.1	8082.53	8190.5	9224.89	26493.4	8499.31	1.64036	6.21094e-79	conserved hypothetical protein [Source:BROAD_F_oxysporum;Acc:FOXG_03139]
FOXG_05933	1656.68	1570.37	1689.16	0.892014	4.14877	3.08318	1638.74	2.70799	9.23089	2.24844e-78	predicted protein [Source:BROAD_F_oxysporum;Acc:FOXG_05933]
FOXG_08526	4337.76	3885.7	4060.5	1206	1173.27	1035.95	4094.65	1138.41	1.84599	2.53468e-78	hypothetical protein similar to LON domain serine protease [Source:BROAD_F_oxysporum;Acc:FOXG_08526]
FOXG_08503	1829.12	1940.65	1891.45	402.298	399.941	300.097	1887.08	367.445	2.35734	6.4014e-78	10 kDa heat shock protein, mitochondrial [Source:BROAD_F_oxysporum;Acc:FOXG_08503]
FOXG_16932	8217.72	8346.65	8554.81	1718.91	1959.88	2280.53	8373.06	1986.44	2.07611	2.7329e-77	conserved hypothetical protein [Source:BROAD_F_oxysporum;Acc:FOXG_16932]
FOXG_02496	413.657	400.031	436.057	1688.58	1614.7	1885.88	416.582	1729.72	-2.05346	3.05774e-77	predicted protein [Source:BROAD_F_oxysporum;Acc:FOXG_02496]
FOXG_00784	475.244	383.501	486.631	16.9483	14.9356	25.6932	448.459	19.1923	4.56872	9.55981e-77	conserved hypothetical protein [Source:BROAD_F_oxysporum;Acc:FOXG_00784]
FOXG_15360	583.021	545.497	546.195	52.6288	69.6993	76.0519	558.238	66.1267	3.0822	1.92378e-75	hypothetical protein similar to monosaccharide transporter [Source:BROAD_F_oxysporum;Acc:FOXG_15360]
FOXG_02814	2524.03	2475.12	2645.56	520.044	625.634	668.023	2548.24	604.567	2.07646	2.95569e-75	hypothetical protein similar to ubiquitin fusion degradation protein [Source:BROAD_F_oxysporum;Acc:FOXG_02814]
FOXG_06133	2525.05	2237.09	2503.96	651.17	570.87	531.335	2422.03	584.459	2.05019	3.61095e-75	hypothetical protein [Source:BROAD_F_oxysporum;Acc:FOXG_06133]
FOXG_11210	1142.43	1314.7	1157.57	278.308	253.905	238.433	1204.9	256.882	2.22825	4.21794e-75	conserved hypothetical protein [Source:BROAD_F_oxysporum;Acc:FOXG_11210]
FOXG_04488	676.427	652.392	712.526	116.854	103.719	124.355	680.449	114.976	2.56918	5.08573e-75	iron transport multicopper oxidase FET3 precursor [Source:BROAD_F_oxysporum;Acc:FOXG_04488]
FOXG_10542	1416.49	1278.34	1648.7	287.228	292.903	278.514	1447.84	286.215	2.33793	7.09711e-75	predicted protein [Source:BROAD_F_oxysporum;Acc:FOXG_10542]
FOXG_01791	313.066	376.889	364.13	1541.4	1433.81	1607.37	351.362	1527.53	-2.1209	8.46665e-75	conserved hypothetical protein [Source:BROAD_F_oxysporum;Acc:FOXG_01791]
FOXG_05401	2279.73	2165.46	2300.54	648.494	639.74	716.326	2248.58	668.187	1.75196	9.95815e-75	conserved hypothetical protein [Source:BROAD_F_oxysporum;Acc:FOXG_05401]
FOXG_12957	781.125	854.061	890.096	150.75	152.675	118.189	841.76	140.538	2.57685	4.61391e-74	conserved hypothetical protein [Source:BROAD_F_oxysporum;Acc:FOXG_12957]
FOXG_10002	2877.13	3068.01	2708.5	8994.17	9228.52	10303	2884.54	9508.55	-1.72075	5.72372e-74	hypothetical protein similar to glycerol-3-phosphate dehydrogenase, mitochondrial [Source:BROAD_F_oxysporum;Acc:FOXG_10002]
FOXG_11319	1731.61	1704.82	1834.14	373.754	423.174	469.672	1756.86	422.2	2.05861	9.37974e-74	hypothetical protein similar to kynurenine 3-monooxygenase [Source:BROAD_F_oxysporum;Acc:FOXG_11319]
FOXG_08397	1020.29	920.182	1032.83	180.187	212.417	212.74	991.098	201.781	2.29697	1.17763e-73	conserved hypothetical protein [Source:BROAD_F_oxysporum;Acc:FOXG_08397]
FOXG_01090	6050.89	5992.75	6126.15	2337.08	2411.26	2322.67	6056.6	2357	1.36138	1.86721e-73	hypothetical protein similar to heat shock protein [Source:BROAD_F_oxysporum;Acc:FOXG_01090]
FOXG_08495	3902.54	3869.17	3450.25	1179.24	1208.95	1177.78	3740.65	1188.66	1.65392	2.02873e-73	hypothetical protein similar to squalene epoxidase [Source:BROAD_F_oxysporum;Acc:FOXG_08495]
FOXG_02432	885.822	890.427	956.404	206.055	214.906	208.629	910.884	209.863	2.11715	6.53325e-73	hypothetical protein similar to NADH-dependent flavin oxidoreductase [Source:BROAD_F_oxysporum;Acc:FOXG_02432]
FOXG_00566	2199.67	2150.03	2424.16	431.735	349.326	274.403	2257.95	351.821	2.67973	1.59516e-72	methylmalonate-semialdehyde dehydrogenase, mitochondrial precursor [Source:BROAD_F_oxysporum;Acc:FOXG_00566]
novel.410	456.768	416.561	543.948	31.2205	29.8711	15.4159	472.426	25.5025	4.1906	3.13001e-72	-
novel.231	353.097	357.053	391.103	10.7042	15.7653	15.4159	367.084	13.9618	4.71805	3.64848e-72	-
FOXG_12664	26952.4	24723.7	25235.1	3710.78	4045.05	5578.51	25637.1	4444.78	2.52836	5.64747e-72	coproporphyrinogen III oxidase [Source:BROAD_F_oxysporum;Acc:FOXG_12664]
FOXG_10690	3189.16	3324.78	3387.31	713.611	863.773	915.706	3300.42	831.03	1.99032	8.95834e-72	conserved hypothetical protein [Source:BROAD_F_oxysporum;Acc:FOXG_10690]
FOXG_13198	6.15867	13.2242	6.74315	462.063	505.32	559.084	8.70866	508.822	-5.875	1.18221e-70	protein SnodProt1 precursor [Source:BROAD_F_oxysporum;Acc:FOXG_13198]
FOXG_00277	834.5	814.388	742.871	3326.32	2818.67	3506.61	797.253	3217.2	-2.01205	3.35102e-70	hypothetical protein similar to endochitinase 1 precursor [Source:BROAD_F_oxysporum;Acc:FOXG_00277]
FOXG_08301	2519.92	2285.58	2266.82	7673.1	7025.52	8170.44	2357.44	7623.02	-1.69281	3.5344e-70	conserved hypothetical protein [Source:BROAD_F_oxysporum;Acc:FOXG_08301]
FOXG_00712	173.469	174.118	180.941	802.812	782.458	832.46	176.176	805.91	-2.19352	4.07761e-70	hypothetical protein [Source:BROAD_F_oxysporum;Acc:FOXG_00712]
FOXG_11505	1810.65	1813.91	1858.86	5663.39	5132.85	5065.67	1827.81	5287.31	-1.53254	4.72446e-70	ATP-dependent RNA helicase DBP2 [Source:BROAD_F_oxysporum;Acc:FOXG_11505]
FOXG_09230	17165.2	17118.7	17295.1	41034.4	39256.5	40043.4	17193	40111.4	-1.22219	5.01498e-70	conserved hypothetical protein [Source:BROAD_F_oxysporum;Acc:FOXG_09230]
FOXG_04152	4383.95	3973.86	4209.97	1301.45	1399.79	1206.55	4189.26	1302.6	1.68457	7.52734e-70	Bifunctional P-450:NADPH-P450 reductaseCytochrome P450 505NADPH--cytochrome P450 reductase [Source:UniProtKB/Swiss-Prot;Acc:Q9Y8G7]
FOXG_09488	2848.38	3141.84	2838.87	910.746	805.691	763.602	2943.03	826.679	1.83126	4.9948e-69	hypothetical protein similar to mitochondrial oxaloacetate transporter Oac [Source:BROAD_F_oxysporum;Acc:FOXG_09488]
FOXG_01281	468.059	509.13	478.764	34.7885	25.7224	53.4419	485.318	37.9842	3.69731	3.44432e-68	conserved hypothetical protein [Source:BROAD_F_oxysporum;Acc:FOXG_01281]
FOXG_05237	5054.21	5279.75	5040.51	12940.4	12619.7	12275.2	5124.82	12611.8	-1.29925	4.36837e-68	conserved hypothetical protein [Source:BROAD_F_oxysporum;Acc:FOXG_05237]
FOXG_07960	3899.46	3914.35	3958.23	1459.33	1504.34	1379.21	3924.02	1447.63	1.43805	4.69206e-68	hypothetical protein similar to CLPTM1 domain protein [Source:BROAD_F_oxysporum;Acc:FOXG_07960]
FOXG_05055	9249.3	9306.51	9275.21	3664.39	3557.15	3864.26	9277	3695.27	1.32824	1.96762e-67	isocitrate dehydrogenase, mitochondrial precursor [Source:BROAD_F_oxysporum;Acc:FOXG_05055]
FOXG_05711	10038.6	9947.88	10535.1	3976.6	3917.27	3619.66	10173.9	3837.84	1.40625	3.16599e-67	endoplasmic oxidoreductin-1 precursor [Source:BROAD_F_oxysporum;Acc:FOXG_05711]
FOXG_13587	594.312	587.373	632.732	2339.75	2081.85	2577.54	604.806	2333.05	-1.94735	3.62315e-67	hypothetical protein [Source:BROAD_F_oxysporum;Acc:FOXG_13587]
FOXG_12730	738.014	633.658	706.907	120.422	129.442	137.716	692.86	129.193	2.42517	5.10223e-67	conserved hypothetical protein [Source:BROAD_F_oxysporum;Acc:FOXG_12730]
FOXG_12686	2207.88	2238.19	2185.9	418.354	417.366	567.306	2210.66	467.675	2.24373	5.67186e-67	predicted protein [Source:BROAD_F_oxysporum;Acc:FOXG_12686]
FOXG_02473	7920.05	7473.86	7447.81	2837.5	2781.33	3021.52	7613.91	2880.12	1.40286	9.36495e-67	conserved hypothetical protein [Source:BROAD_F_oxysporum;Acc:FOXG_02473]
FOXG_03414	15581.4	14954.3	15351.9	3655.47	4103.13	4785.1	15295.9	4181.23	1.87143	1.16915e-66	conserved hypothetical protein [Source:BROAD_F_oxysporum;Acc:FOXG_03414]
FOXG_04867	491.667	412.153	534.957	56.1969	53.934	49.3309	479.592	53.1539	3.17065	6.76814e-66	hypothetical protein similar to RING-4 [Source:BROAD_F_oxysporum;Acc:FOXG_04867]
FOXG_03447	704.141	700.881	705.783	165.023	151.015	157.242	703.602	157.76	2.15756	1.17278e-65	conserved hypothetical protein [Source:BROAD_F_oxysporum;Acc:FOXG_03447]
FOXG_07907	400.314	459.54	542.824	44.6007	48.1257	41.1091	467.559	44.6118	3.38446	1.2539e-65	conserved hypothetical protein [Source:BROAD_F_oxysporum;Acc:FOXG_07907]
FOXG_11243	7511.52	7193.95	8064.81	1947.27	1822.97	1409.01	7590.09	1726.42	2.13564	1.93233e-65	zinc-finger protein zpr1 [Source:BROAD_F_oxysporum;Acc:FOXG_11243]
novel.642	600.47	635.862	650.714	132.91	116.995	117.161	629.015	122.355	2.3611	3.66964e-65	PF00172:Fungal Zn(2)-Cys(6) binuclear cluster domain
FOXG_08134	18588.9	18379.4	19358.5	4175.52	4842.44	5634	18775.6	4883.99	1.94295	5.7585e-65	conserved hypothetical protein [Source:BROAD_F_oxysporum;Acc:FOXG_08134]
FOXG_11059	6130.96	6080.91	6576.82	2224.68	2196.36	1941.38	6262.9	2120.81	1.56169	1.08615e-64	chorismate synthase [Source:BROAD_F_oxysporum;Acc:FOXG_11059]
FOXG_09058	6574.38	7187.33	6101.43	2132.8	2074.38	2273.33	6621.05	2160.17	1.61624	2.37923e-64	NAD(P) transhydrogenase, mitochondrial precursor [Source:BROAD_F_oxysporum;Acc:FOXG_09058]
FOXG_06155	9399.16	8952.76	9474.13	2203.27	2508.34	2908.47	9275.35	2540.03	1.86899	2.27358e-63	conserved hypothetical protein [Source:BROAD_F_oxysporum;Acc:FOXG_06155]
FOXG_12757	462.927	500.314	545.071	66.901	77.1671	80.1628	502.771	74.7436	2.75126	2.68607e-63	conserved hypothetical protein [Source:BROAD_F_oxysporum;Acc:FOXG_12757]
FOXG_02393	365.414	298.646	330.414	1666.28	1529.24	1330.91	331.492	1508.81	-2.18601	3.89582e-63	conserved hypothetical protein [Source:BROAD_F_oxysporum;Acc:FOXG_02393]
FOXG_03388	412.631	387.909	431.562	1618.11	1488.58	1840.66	410.7	1649.12	-2.00493	4.15354e-63	conserved hypothetical protein [Source:BROAD_F_oxysporum;Acc:FOXG_03388]
FOXG_15666	38178.6	39020.1	40181.3	12015.4	12190.7	14411.8	39126.7	12872.7	1.60395	4.31217e-63	hypothetical protein [Source:BROAD_F_oxysporum;Acc:FOXG_15666]
FOXG_05777	8143.81	7790.14	8767.22	2701.02	2368.12	2804.67	8233.72	2624.6	1.64983	5.55525e-63	hypothetical protein [Source:BROAD_F_oxysporum;Acc:FOXG_05777]
FOXG_07927	2482.97	2323.05	2614.1	703.799	671.271	547.779	2473.37	640.949	1.94656	7.29888e-62	hypothetical protein similar to aminotransferase [Source:BROAD_F_oxysporum;Acc:FOXG_07927]
FOXG_06249	55018.5	54996	57514.6	12088.6	13075.3	16647.1	55843	13937	2.00256	1.01052e-61	conserved hypothetical protein [Source:BROAD_F_oxysporum;Acc:FOXG_06249]
FOXG_10510	499.879	508.028	447.296	1663.61	1537.53	1600.17	485.068	1600.44	-1.72164	1.23608e-61	conserved hypothetical protein [Source:BROAD_F_oxysporum;Acc:FOXG_10510]
FOXG_08142	589.179	534.477	649.59	68.685	80.4861	100.717	591.082	83.2962	2.83358	1.35077e-61	conserved hypothetical protein [Source:BROAD_F_oxysporum;Acc:FOXG_08142]
FOXG_00361	4991.6	4719.93	5121.42	1496.8	1552.47	1779	4944.32	1609.42	1.61992	1.66708e-61	conserved hypothetical protein [Source:BROAD_F_oxysporum;Acc:FOXG_00361]
FOXG_07826	9270.85	10698.4	9510.09	3518.1	3466.71	3209.59	9826.43	3398.14	1.5317	2.21864e-61	3-isopropylmalate dehydrogenase [Source:BROAD_F_oxysporum;Acc:FOXG_07826]
FOXG_05039	2469.63	2395.78	2719.74	867.037	796.563	819.099	2528.38	827.567	1.61125	2.3697e-61	conserved hypothetical protein [Source:BROAD_F_oxysporum;Acc:FOXG_05039]
FOXG_08326	18023.3	18028.9	19230.3	7500.05	7615.48	7976.2	18427.5	7697.24	1.25952	1.81289e-60	conserved hypothetical protein [Source:BROAD_F_oxysporum;Acc:FOXG_08326]
FOXG_08080	150840	137462	154781	21948	20112.4	32390.9	147694	24817.1	2.57327	1.99079e-60	hypothetical protein similar to fructose-6-phosphate phosphoketolase [Source:BROAD_F_oxysporum;Acc:FOXG_08080]
FOXG_08328	967.938	1023.77	1047.44	207.839	255.564	262.071	1013.05	241.825	2.06762	5.22852e-60	conserved hypothetical protein [Source:BROAD_F_oxysporum;Acc:FOXG_08328]
FOXG_05473	2541.48	2752.83	2942.26	660.09	817.307	787.24	2745.52	754.879	1.86266	7.38175e-60	conserved hypothetical protein [Source:BROAD_F_oxysporum;Acc:FOXG_05473]
FOXG_03558	1651.55	1439.23	1268.84	5351.19	5004.24	4969.06	1453.21	5108.17	-1.81312	7.57865e-60	conserved hypothetical protein [Source:BROAD_F_oxysporum;Acc:FOXG_03558]
FOXG_02968	668.216	738.349	703.535	98.1215	140.228	96.6064	703.367	111.652	2.64853	7.89084e-60	conserved hypothetical protein [Source:BROAD_F_oxysporum;Acc:FOXG_02968]
FOXG_05205	4131.44	4224.02	4494.31	12476.6	12293.6	14751	4283.26	13173.7	-1.62084	1.91956e-59	S-(hydroxymethyl)glutathione dehydrogenase [Source:BROAD_F_oxysporum;Acc:FOXG_05205]
FOXG_01685	1590.99	1540.62	1682.42	455.819	469.64	530.308	1604.67	485.256	1.72703	2.39582e-59	predicted protein [Source:BROAD_F_oxysporum;Acc:FOXG_01685]
FOXG_07916	5009.05	4616.34	5322.59	906.286	955.876	1299.05	4982.66	1053.74	2.2426	2.65149e-59	conserved hypothetical protein [Source:BROAD_F_oxysporum;Acc:FOXG_07916]
FOXG_03240	646.66	670.024	560.805	112.394	114.506	86.3291	625.83	104.41	2.57766	2.88275e-59	hypothetical protein [Source:BROAD_F_oxysporum;Acc:FOXG_03240]
FOXG_03539	1224.55	1603.43	1535.19	322.017	298.711	252.821	1454.39	291.183	2.3181	3.16974e-59	predicted protein [Source:BROAD_F_oxysporum;Acc:FOXG_03539]
FOXG_03026	5976.99	5852.8	6017.14	2433.41	2577.21	2530.27	5948.97	2513.63	1.24284	3.18569e-59	conserved hypothetical protein [Source:BROAD_F_oxysporum;Acc:FOXG_03026]
FOXG_09782	393.128	347.134	388.855	48.1687	34.8496	31.8596	376.373	38.2926	3.29237	3.34296e-59	siderophore iron transporter mirB [Source:BROAD_F_oxysporum;Acc:FOXG_09782]
novel.465	2686.21	2794.71	3700.87	653.846	695.333	594.027	3060.59	647.735	2.23935	4.61757e-59	-
FOXG_04089	586.1	522.355	501.241	1962.43	1725.06	1812.91	536.565	1833.47	-1.77187	5.75015e-59	predicted protein [Source:BROAD_F_oxysporum;Acc:FOXG_04089]
novel.148	739.04	743.859	638.352	148.074	160.972	141.826	707.084	150.291	2.23206	7.57986e-59	-
FOXG_17028	1719.3	1561.55	1988.11	164.13	124.463	254.877	1756.32	181.157	3.2834	9.98896e-59	hypothetical protein similar to flavohemoglobin [Source:BROAD_F_oxysporum;Acc:FOXG_17028]
FOXG_04351	778.045	698.677	675.439	3472.61	3046.85	2566.24	717.387	3028.57	-2.0777	1.49956e-58	ATP-binding cassette sub-family F member 2 [Source:BROAD_F_oxysporum;Acc:FOXG_04351]
FOXG_14921	516.302	547.701	611.379	5.35208	1.65951	3.08318	558.461	3.36492	7.38682	2.05015e-58	hypothetical protein similar to small heat shock protein [Source:BROAD_F_oxysporum;Acc:FOXG_14921]
FOXG_10306	7923.13	8104.21	8473.89	2731.35	2948.94	3201.37	8167.08	2960.55	1.46422	2.54175e-58	GTP-binding protein 1 [Source:BROAD_F_oxysporum;Acc:FOXG_10306]
FOXG_02786	663.083	714.105	739.499	160.562	172.589	172.658	705.562	168.603	2.06509	5.64923e-58	conserved hypothetical protein [Source:BROAD_F_oxysporum;Acc:FOXG_02786]
FOXG_15294	3309.26	3062.5	3197.38	8359.95	8407.06	9551.7	3189.71	8772.91	-1.45942	8.94601e-58	hypothetical protein similar to catalase 2 [Source:BROAD_F_oxysporum;Acc:FOXG_15294]
FOXG_10609	1505.79	1477.8	1625.1	454.927	505.32	503.587	1536.23	487.944	1.65472	4.10986e-57	iron sulfur cluster assembly protein 1, mitochondrial precursor [Source:BROAD_F_oxysporum;Acc:FOXG_10609]
FOXG_03221	3620.27	3877.99	3657.04	1178.35	1113.53	1354.55	3718.43	1215.47	1.61421	1.51625e-56	electron transfer flavoprotein-ubiquinone oxidoreductase [Source:BROAD_F_oxysporum;Acc:FOXG_03221]
FOXG_03218	1410.34	1268.42	1249.73	3542.19	3473.35	3717.29	1309.49	3577.61	-1.44942	2.41024e-56	polyadenylate-binding protein [Source:BROAD_F_oxysporum;Acc:FOXG_03218]
FOXG_00475	412.631	408.847	371.997	40.1406	43.1472	19.5268	397.825	34.2715	3.51631	3.37241e-56	conserved hypothetical protein [Source:BROAD_F_oxysporum;Acc:FOXG_00475]
FOXG_03689	11509.5	12287.5	12296.1	3486.88	3337.27	2524.1	12031	3116.08	1.94852	7.30846e-56	hypothetical protein [Source:BROAD_F_oxysporum;Acc:FOXG_03689]
FOXG_14543	418.79	425.377	452.915	61.5489	66.3803	41.1091	432.361	56.3461	2.92727	1.23476e-55	predicted protein [Source:BROAD_F_oxysporum;Acc:FOXG_14543]
novel.433	1732.64	1683.88	1936.41	498.636	419.025	528.252	1784.31	481.971	1.89014	1.5323e-55	-
FOXG_00150	2334.14	2258.03	2328.64	792.108	862.114	730.715	2306.93	794.979	1.53567	3.74514e-55	conserved hypothetical protein [Source:BROAD_F_oxysporum;Acc:FOXG_00150]
FOXG_00618	9929.83	9944.57	8816.67	24324.3	23630.5	25809.3	9563.69	24588.1	-1.36224	9.42405e-55	conserved hypothetical protein [Source:BROAD_F_oxysporum;Acc:FOXG_00618]
FOXG_00556	6216.15	6429.15	6500.4	16364	16958.5	19581.3	6381.9	17634.6	-1.4663	1.70747e-54	hexokinase-1 [Source:BROAD_F_oxysporum;Acc:FOXG_00556]
FOXG_00232	4141.71	4706.7	5064.11	1594.03	1574.87	1572.42	4637.5	1580.44	1.55285	2.10117e-54	conserved hypothetical protein [Source:BROAD_F_oxysporum;Acc:FOXG_00232]
FOXG_03505	1066.48	1049.12	1053.06	339.857	354.305	342.233	1056.22	345.465	1.61188	2.28531e-54	conserved hypothetical protein [Source:BROAD_F_oxysporum;Acc:FOXG_03505]
FOXG_09306	472.165	466.152	525.966	97.2295	92.9324	98.6619	488.094	96.2746	2.34298	6.35236e-54	predicted protein [Source:BROAD_F_oxysporum;Acc:FOXG_09306]
FOXG_01477	1980.01	1936.24	2154.44	703.799	638.08	588.888	2023.56	643.589	1.65166	6.95454e-54	conserved hypothetical protein [Source:BROAD_F_oxysporum;Acc:FOXG_01477]
FOXG_08307	467.032	469.458	479.888	98.1215	82.1456	96.6064	472.126	92.2912	2.35818	1.15739e-53	conserved hypothetical protein [Source:BROAD_F_oxysporum;Acc:FOXG_08307]
FOXG_14893	278.167	299.748	264.107	28.5444	21.5736	21.5823	280.674	23.9001	3.55179	7.07403e-53	conserved hypothetical protein [Source:BROAD_F_oxysporum;Acc:FOXG_14893]
FOXG_01305	829.367	858.469	793.444	221.219	239.799	198.351	827.094	219.79	1.90876	7.13819e-53	hypothetical protein similar to acetyltransferase [Source:BROAD_F_oxysporum;Acc:FOXG_01305]
FOXG_00444	10449.2	10211.3	10902.6	4803.49	4776.06	4625.8	10521	4735.12	1.1517	8.28486e-53	zinc-finger transcription factor ace1 [Source:BROAD_F_oxysporum;Acc:FOXG_00444]
FOXG_01074	2402.91	2239.29	2376.96	920.558	932.643	885.901	2339.72	913.034	1.35719	9.05436e-53	conserved hypothetical protein [Source:BROAD_F_oxysporum;Acc:FOXG_01074]
FOXG_13455	332.568	289.83	339.405	3.56805	8.29753	3.08318	320.601	4.98292	5.96415	1.04949e-52	predicted protein [Source:BROAD_F_oxysporum;Acc:FOXG_13455]
FOXG_11024	1786.01	1627.67	1952.14	566.429	556.765	494.337	1788.61	539.177	1.72875	1.98498e-52	conserved hypothetical protein [Source:BROAD_F_oxysporum;Acc:FOXG_11024]
FOXG_07752	2109.34	2066.28	2190.4	470.091	549.297	656.718	2122.01	558.702	1.927	4.0309e-52	conserved hypothetical protein [Source:BROAD_F_oxysporum;Acc:FOXG_07752]
FOXG_05139	2927.42	3073.52	3011.94	1160.51	1246.29	1255.88	3004.29	1220.89	1.29921	1.19989e-51	glycosylphosphatidylinositol anchor biosynthesis protein 11 [Source:BROAD_F_oxysporum;Acc:FOXG_05139]
FOXG_08341	5025.47	4820.21	5123.67	1839.33	2052.81	2065.73	4989.78	1985.96	1.32928	1.74194e-51	hypothetical protein similar to LON domain serine protease [Source:BROAD_F_oxysporum;Acc:FOXG_08341]
FOXG_06208	11620.4	12806.5	12018.5	4115.75	3685.76	3068.8	12148.5	3623.44	1.74504	2.7135e-51	branched-chain-amino-acid aminotransferase, mitochondrial precursor [Source:BROAD_F_oxysporum;Acc:FOXG_06208]
FOXG_02587	573.783	536.681	602.388	140.046	134.42	135.66	570.951	136.709	2.06222	3.6174e-51	hypothetical protein similar to mitochondrial phosphate carrier protein Mir1 [Source:BROAD_F_oxysporum;Acc:FOXG_02587]
FOXG_10407	1152.7	1136.18	1099.13	382.674	380.027	400.814	1129.34	387.838	1.54294	4.47541e-51	conserved hypothetical protein [Source:BROAD_F_oxysporum;Acc:FOXG_10407]
FOXG_08698	581.994	589.577	622.618	112.394	118.655	150.048	598.063	127.032	2.24062	4.61016e-51	predicted protein [Source:BROAD_F_oxysporum;Acc:FOXG_08698]
FOXG_07850	3029.04	2858.62	2817.51	1211.35	1155.85	1200.39	2901.73	1189.2	1.28728	6.31006e-51	hypothetical protein similar to aspartyl aminopeptidase [Source:BROAD_F_oxysporum;Acc:FOXG_07850]
FOXG_02077	1984.12	2302.11	2199.39	469.199	399.941	272.348	2161.87	380.496	2.50377	6.70785e-51	succinate-semialdehyde dehydrogenase [Source:BROAD_F_oxysporum;Acc:FOXG_02077]
FOXG_05963	1183.49	1306.99	1573.4	338.073	262.202	272.348	1354.63	290.874	2.21889	7.35153e-51	conserved hypothetical protein [Source:BROAD_F_oxysporum;Acc:FOXG_05963]
FOXG_01807	585.074	618.23	551.815	1574.4	1630.47	1626.89	585.039	1610.59	-1.46082	1.66773e-50	conserved hypothetical protein [Source:BROAD_F_oxysporum;Acc:FOXG_01807]
FOXG_07027	182.707	212.689	196.675	715.395	740.97	797.517	197.357	751.294	-1.92895	2.67655e-50	conserved hypothetical protein [Source:BROAD_F_oxysporum;Acc:FOXG_07027]
FOXG_09364	16582.2	16810.1	16106	7993.33	7635.39	7533.25	16499.5	7720.66	1.09559	5.75684e-50	cell division cycle protein 48 [Source:BROAD_F_oxysporum;Acc:FOXG_09364]
FOXG_15454	3748.58	3753.46	4091.97	1521.78	1424.69	1291.85	3864.67	1412.77	1.45117	6.97133e-50	hypothetical protein [Source:BROAD_F_oxysporum;Acc:FOXG_15454]
FOXG_08295	2398.8	2307.62	2179.16	843.845	894.474	911.595	2295.19	883.305	1.37808	7.50142e-50	hypothetical protein similar to mitochondrial DnaJ chaperone Mdj1 [Source:BROAD_F_oxysporum;Acc:FOXG_08295]
FOXG_15358	248.4	243.545	273.098	4.46007	10.7868	6.16637	255.014	7.13774	5.13548	1.02042e-49	conserved hypothetical protein [Source:BROAD_F_oxysporum;Acc:FOXG_15358]
FOXG_12135	52585.8	51931.3	58247.3	14823.5	15153	19235	54254.8	16403.8	1.7258	1.28493e-49	conserved hypothetical protein [Source:BROAD_F_oxysporum;Acc:FOXG_12135]
FOXG_09470	12968.1	13121.7	14070.7	5017.58	5128.71	4210.6	13386.8	4785.63	1.48373	3.3188e-49	eukaryotic translation initiation factor 6 [Source:BROAD_F_oxysporum;Acc:FOXG_09470]
FOXG_00772	8161.26	7688.75	8564.93	3038.2	3086.68	3453.17	8138.31	3192.68	1.35027	5.61649e-49	conserved hypothetical protein [Source:BROAD_F_oxysporum;Acc:FOXG_00772]
FOXG_07694	3159.4	3157.27	3445.75	1014.22	945.089	1195.25	3254.14	1051.52	1.63098	6.00052e-49	conserved hypothetical protein [Source:BROAD_F_oxysporum;Acc:FOXG_07694]
FOXG_03726	1291.27	1173.64	1060.92	3751.81	3449.29	3275.37	1175.28	3492.15	-1.57079	7.91867e-49	hypothetical protein similar to importin beta-3 subunit [Source:BROAD_F_oxysporum;Acc:FOXG_03726]
FOXG_01272	2528.13	2468.51	2696.14	585.161	648.037	821.155	2564.26	684.784	1.90647	9.94803e-49	conserved hypothetical protein [Source:BROAD_F_oxysporum;Acc:FOXG_01272]
novel.496	249.426	234.729	289.956	6.24409	14.1058	5.13864	258.037	8.49618	4.88482	1.02149e-48	PF11034:Glucose-repressible protein Grg1
FOXG_03101	189.892	192.852	197.799	765.348	753.416	663.912	193.515	727.559	-1.91186	1.28411e-48	conserved hypothetical protein [Source:BROAD_F_oxysporum;Acc:FOXG_03101]
FOXG_12010	373.626	344.93	333.786	62.4409	48.1257	52.4141	350.781	54.3269	2.69215	2.86574e-48	hypothetical protein similar to hexokinase [Source:BROAD_F_oxysporum;Acc:FOXG_12010]
FOXG_15663	6091.95	5879.24	6168.86	2650.17	2822.82	2763.56	6046.68	2745.52	1.13903	3.16565e-48	hypothetical protein similar to polyubiquitin binding protein Doa1/Ufd3 [Source:BROAD_F_oxysporum;Acc:FOXG_15663]
FOXG_08129	515.275	600.598	600.14	131.126	97.0812	118.189	572.004	115.465	2.31074	6.148e-48	hypothetical protein similar to acetyltransferase [Source:BROAD_F_oxysporum;Acc:FOXG_08129]
FOXG_08032	13670.2	13635.2	13825.7	5420.77	5796.66	6271.2	13710.4	5829.54	1.23398	8.41816e-48	acetolactate synthase small subunit, mitochondrial precursor [Source:BROAD_F_oxysporum;Acc:FOXG_08032]
FOXG_00901	4813	4752.99	4779.77	1848.25	2084.34	2068.82	4781.92	2000.47	1.25735	8.99562e-48	hypothetical protein similar to NADH-cytochrome b5 reductase precursor [Source:BROAD_F_oxysporum;Acc:FOXG_00901]
FOXG_12326	457.794	577.455	440.553	64.225	49.7852	27.7487	491.934	47.2529	3.36772	1.06006e-47	hypothetical protein [Source:BROAD_F_oxysporum;Acc:FOXG_12326]
FOXG_05921	8573.89	9047.53	8585.16	4089.88	3913.12	3731.68	8735.53	3911.56	1.15898	3.16299e-47	acetyl-CoA acetyltransferase IB [Source:BROAD_F_oxysporum;Acc:FOXG_05921]
FOXG_07107	505.011	485.988	501.241	1402.25	1446.26	1657.73	497.413	1502.08	-1.59369	3.25195e-47	conserved hypothetical protein [Source:BROAD_F_oxysporum;Acc:FOXG_07107]
FOXG_04394	1496.56	1549.43	1547.55	211.407	266.351	371.01	1531.18	282.923	2.43967	3.50169e-47	conserved hypothetical protein [Source:BROAD_F_oxysporum;Acc:FOXG_04394]
FOXG_10426	3194.3	3319.27	3313.14	1461.12	1331.75	1332.96	3275.57	1375.28	1.25183	3.9207e-47	conserved hypothetical protein [Source:BROAD_F_oxysporum;Acc:FOXG_10426]
FOXG_01519	3485.81	3253.15	3254.69	933.938	882.858	1178.8	3331.22	998.533	1.73963	6.63849e-47	conserved hypothetical protein [Source:BROAD_F_oxysporum;Acc:FOXG_01519]
FOXG_16821	444.451	428.683	475.392	97.2295	82.9753	65.7746	449.509	81.9931	2.44858	2.47765e-46	conserved hypothetical protein [Source:BROAD_F_oxysporum;Acc:FOXG_16821]
FOXG_02210	478.323	466.152	495.622	84.7413	97.0812	117.161	480.032	99.6611	2.27344	3.45301e-46	predicted protein [Source:BROAD_F_oxysporum;Acc:FOXG_02210]
FOXG_08461	6315.72	5891.37	6086.82	1933.89	2049.49	2436.74	6097.97	2140.04	1.5113	4.68904e-46	hypothetical protein similar to LAP2 [Source:BROAD_F_oxysporum;Acc:FOXG_08461]
FOXG_09808	1170.15	1230.95	1200.28	295.256	227.352	170.603	1200.46	231.071	2.37388	5.28249e-46	conserved hypothetical protein [Source:BROAD_F_oxysporum;Acc:FOXG_09808]
FOXG_02983	9331.41	8147.19	7573.68	23476	21686.4	24821.7	8350.76	23328	-1.48197	5.57125e-46	hypothetical protein [Source:BROAD_F_oxysporum;Acc:FOXG_02983]
FOXG_04395	3268.2	3565.02	2824.26	922.342	1064.57	849.931	3219.16	945.616	1.76645	5.97623e-46	dihydroxy-acid dehydratase [Source:BROAD_F_oxysporum;Acc:FOXG_04395]
FOXG_00527	8565.68	8402.86	7796.21	3246.04	3078.39	3584.71	8254.92	3303.05	1.32186	6.36599e-46	ammonium transporter MEP1 [Source:BROAD_F_oxysporum;Acc:FOXG_00527]
FOXG_11133	739.04	740.553	687.801	214.975	226.523	200.407	722.465	213.968	1.75352	7.29382e-46	acetylornithine aminotransferase, mitochondrial precursor [Source:BROAD_F_oxysporum;Acc:FOXG_11133]
FOXG_05479	638.449	634.76	628.237	163.238	174.248	194.241	633.815	177.242	1.84106	1.54481e-45	predicted protein [Source:BROAD_F_oxysporum;Acc:FOXG_05479]
FOXG_05845	1112.67	1132.87	1140.72	374.646	416.536	416.23	1128.75	402.471	1.48801	1.67204e-45	conserved hypothetical protein [Source:BROAD_F_oxysporum;Acc:FOXG_05845]
FOXG_00501	3695.2	3623.42	3689.63	1054.36	1062.08	1370.99	3669.42	1162.48	1.65956	1.93324e-45	conserved hypothetical protein [Source:BROAD_F_oxysporum;Acc:FOXG_00501]
FOXG_05445	6406.04	6347.6	6664.48	2008.81	2076.04	2561.1	6472.71	2215.32	1.54746	2.22913e-45	delta-aminolevulinic acid dehydratase [Source:BROAD_F_oxysporum;Acc:FOXG_05445]
FOXG_11239	511.17	514.641	442.8	1380.84	1382.37	1357.63	489.537	1373.61	-1.48797	3.4872e-45	hypothetical protein similar to cyclin dependent kinase Pho85 [Source:BROAD_F_oxysporum;Acc:FOXG_11239]
FOXG_02252	2158.61	2217.25	2219.62	834.033	824.775	940.371	2198.5	866.393	1.34454	4.06232e-45	hypothetical protein similar to diacylglycerol O-acyltransferase DGAT [Source:BROAD_F_oxysporum;Acc:FOXG_02252]
FOXG_14491	461.9	577.455	481.011	100.798	100.4	115.106	506.789	105.434	2.26784	5.18765e-45	conserved hypothetical protein [Source:BROAD_F_oxysporum;Acc:FOXG_14491]
FOXG_04165	2864.81	2931.36	3068.13	6568.79	6254.68	6792.25	2954.77	6538.57	-1.14591	6.65188e-45	hypothetical protein [Source:BROAD_F_oxysporum;Acc:FOXG_04165]
FOXG_11384	104.697	101.385	98.8996	495.068	457.194	430.618	101.661	460.96	-2.18091	7.83559e-45	conserved hypothetical protein [Source:BROAD_F_oxysporum;Acc:FOXG_11384]
FOXG_08557	1085.98	1086.59	1151.96	330.937	355.134	402.869	1108.17	362.98	1.61215	2.44822e-44	hypothetical protein similar to FAD-dependent oxidoreductase [Source:BROAD_F_oxysporum;Acc:FOXG_08557]
FOXG_00980	4181.74	4280.22	4403.28	1710.88	1879.39	1929.05	4288.41	1839.77	1.2211	2.77222e-44	conserved hypothetical protein [Source:BROAD_F_oxysporum;Acc:FOXG_00980]
FOXG_11414	2950	2870.75	2855.72	520.936	718.566	828.349	2892.16	689.284	2.07004	3.09749e-44	conserved hypothetical protein [Source:BROAD_F_oxysporum;Acc:FOXG_11414]
FOXG_12735	6773.51	5897.98	6353.17	1367.46	1588.98	2030.79	6341.55	1662.41	1.93226	3.70347e-44	conserved hypothetical protein [Source:BROAD_F_oxysporum;Acc:FOXG_12735]
FOXG_08553	1759.33	1765.43	1725.12	524.504	524.404	659.801	1749.96	569.57	1.62156	4.15494e-44	conserved hypothetical protein [Source:BROAD_F_oxysporum;Acc:FOXG_08553]
FOXG_11952	1816.81	1808.4	1819.53	535.208	576.679	689.605	1814.91	600.497	1.59747	4.71359e-44	predicted protein [Source:BROAD_F_oxysporum;Acc:FOXG_11952]
novel.666	5165.07	5286.36	6004.78	2255.9	2039.53	2197.28	5485.4	2164.24	1.34184	7.46896e-44	-
FOXG_07801	2993.11	2551.16	3153.55	466.523	514.447	758.463	2899.27	579.811	2.32398	8.68672e-44	conserved hypothetical protein [Source:BROAD_F_oxysporum;Acc:FOXG_07801]
FOXG_06163	29241.4	28664.5	28610.1	9501.73	10025.1	7222.87	28838.6	8916.56	1.69328	9.53441e-44	78 kDa glucose-regulated protein precursor [Source:BROAD_F_oxysporum;Acc:FOXG_06163]
FOXG_11002	12659.1	13119.5	13941.5	5610.77	5926.1	5122.2	13240	5553.02	1.25332	1.13763e-43	hypothetical protein similar to NAD dependent epimerase/dehydratase family protein [Source:BROAD_F_oxysporum;Acc:FOXG_11002]
FOXG_01344	1095.22	1088.79	1202.53	336.289	365.092	404.925	1128.85	368.768	1.61557	1.31988e-43	conserved hypothetical protein [Source:BROAD_F_oxysporum;Acc:FOXG_01344]
FOXG_12038	207.342	197.26	183.189	722.531	700.312	639.247	195.93	687.363	-1.81046	1.47205e-43	conserved hypothetical protein [Source:BROAD_F_oxysporum;Acc:FOXG_12038]
FOXG_07582	196.051	203.873	231.515	10.7042	9.12729	5.13864	210.479	8.32336	4.63661	1.72387e-43	conserved hypothetical protein [Source:BROAD_F_oxysporum;Acc:FOXG_07582]
FOXG_02000	13087.2	12792.2	13879.7	6177.19	6321.89	5801.52	13253	6100.2	1.11923	2.17833e-43	hypothetical protein similar to protein mitochondrial targeting protein Mas1 [Source:BROAD_F_oxysporum;Acc:FOXG_02000]
FOXG_07056	255.585	245.749	248.373	807.272	778.309	736.881	249.902	774.154	-1.63144	5.59631e-43	conserved hypothetical protein [Source:BROAD_F_oxysporum;Acc:FOXG_07056]
FOXG_04321	1688.5	1635.39	1891.45	402.298	356.794	531.335	1738.45	430.142	2.01773	1.01249e-42	conserved hypothetical protein [Source:BROAD_F_oxysporum;Acc:FOXG_04321]
FOXG_05657	669.242	635.862	595.645	1629.71	1718.42	1894.1	633.583	1747.41	-1.46269	1.57367e-42	L-xylulose reductase [Source:BROAD_F_oxysporum;Acc:FOXG_05657]
FOXG_05349	7139.95	7275.5	6892.62	14963.5	14499.9	16048	7102.69	15170.5	-1.09474	1.84251e-42	transketolase [Source:BROAD_F_oxysporum;Acc:FOXG_05349]
FOXG_11434	2670.81	2643.73	2865.84	1139.99	1138.42	1225.05	2726.79	1167.82	1.22386	1.923e-42	hypothetical protein [Source:BROAD_F_oxysporum;Acc:FOXG_11434]
FOXG_01500	412.631	491.498	596.769	74.0371	44.8067	76.0519	500.299	64.9652	2.95243	2.29823e-42	predicted protein [Source:BROAD_F_oxysporum;Acc:FOXG_01500]
FOXG_07646	575.836	647.984	633.856	150.75	160.142	112.022	619.225	140.972	2.12867	2.38934e-42	conserved hypothetical protein [Source:BROAD_F_oxysporum;Acc:FOXG_07646]
FOXG_09859	529.646	587.373	552.938	107.934	75.5076	51.3864	556.652	78.2759	2.8227	2.55101e-42	conserved hypothetical protein [Source:BROAD_F_oxysporum;Acc:FOXG_09859]
FOXG_04199	1717.24	1765.43	1826.27	693.987	650.527	564.223	1769.65	636.245	1.47429	2.72152e-42	ATPase family AAA domain-containing protein 1-B [Source:BROAD_F_oxysporum;Acc:FOXG_04199]
FOXG_08653	755.463	851.857	810.302	143.614	107.868	61.6637	805.874	104.382	2.94167	3.29321e-42	glutamine amidotransferase subunit pdxT [Source:BROAD_F_oxysporum;Acc:FOXG_08653]
FOXG_04071	12190.1	11009.1	12426.5	3354.86	3220.27	4366.82	11875.2	3647.32	1.70345	4.08539e-42	conserved hypothetical protein [Source:BROAD_F_oxysporum;Acc:FOXG_04071]
FOXG_07794	1644.36	1658.53	1632.97	669.902	631.442	559.084	1645.29	620.143	1.40631	6.5132e-42	hypothetical protein similar to mitochondrial methylglutaconyl-CoA hydratase Auh [Source:BROAD_F_oxysporum;Acc:FOXG_07794]
FOXG_15675	386.97	389.011	373.121	74.0371	90.4431	85.3014	383.034	83.2606	2.20125	8.08903e-42	conserved hypothetical protein [Source:BROAD_F_oxysporum;Acc:FOXG_15675]
FOXG_03178	718.511	706.391	785.577	206.055	170.929	136.688	736.827	171.224	2.10146	1.0601e-41	2-oxoisovalerate dehydrogenase subunit beta, mitochondrial precursor [Source:BROAD_F_oxysporum;Acc:FOXG_03178]
FOXG_03464	326.409	318.482	296.699	60.6569	41.4877	45.22	313.863	49.1215	2.67603	1.13781e-41	conserved hypothetical protein [Source:BROAD_F_oxysporum;Acc:FOXG_03464]
FOXG_14598	414.684	360.359	398.97	54.4128	81.3158	52.4141	391.337	62.7143	2.63244	1.16017e-41	predicted protein [Source:BROAD_F_oxysporum;Acc:FOXG_14598]
FOXG_16428	501.932	494.804	528.214	132.91	141.888	146.965	508.316	140.588	1.85526	2.1113e-41	conserved hypothetical protein [Source:BROAD_F_oxysporum;Acc:FOXG_16428]
FOXG_13662	4139.65	3971.66	4259.42	859.901	1004	1335.02	4123.58	1066.31	1.95237	2.91598e-41	phosphopantothenoylcysteine decarboxylase [Source:BROAD_F_oxysporum;Acc:FOXG_13662]
FOXG_08692	3981.58	3898.93	3481.71	779.62	865.433	1195.25	3787.41	946.767	2.00144	4.50436e-41	conserved hypothetical protein [Source:BROAD_F_oxysporum;Acc:FOXG_08692]
FOXG_03351	1570.46	1502.04	1474.5	500.42	555.105	607.387	1515.67	554.304	1.45257	4.65001e-41	hypothetical protein similar to RING-13 protein [Source:BROAD_F_oxysporum;Acc:FOXG_03351]
FOXG_02954	395.181	382.399	409.085	97.2295	73.0183	76.0519	395.555	82.0999	2.26782	5.21044e-41	3-ketoacyl-CoA thiolase B [Source:BROAD_F_oxysporum;Acc:FOXG_02954]
FOXG_11556	6376.28	6752.04	5917.12	2202.38	2667.66	2464.49	6348.48	2444.84	1.37657	7.11073e-41	acetolactate synthase catalytic subunit, mitochondrial precursor [Source:BROAD_F_oxysporum;Acc:FOXG_11556]
FOXG_01161	17346.9	16827.8	16636.5	6857.8	7479.4	8062.53	16937.1	7466.57	1.1818	7.73527e-41	threonine dehydratase, mitochondrial precursor [Source:BROAD_F_oxysporum;Acc:FOXG_01161]
FOXG_05415	220.686	200.567	228.143	22.3003	23.2331	14.3882	216.465	19.9739	3.42167	1.24528e-40	predicted protein [Source:BROAD_F_oxysporum;Acc:FOXG_05415]
FOXG_17660	62.6131	63.9168	51.6975	419.246	548.467	849.931	59.4091	605.881	-3.34795	1.70741e-40	conserved hypothetical protein [Source:BROAD_F_oxysporum;Acc:FOXG_17660]
FOXG_13633	273.034	289.83	271.974	38.3566	27.3819	14.3882	278.279	26.7089	3.3634	1.76626e-40	hypothetical protein similar to appr-1-p processing enzyme family protein [Source:BROAD_F_oxysporum;Acc:FOXG_13633]
FOXG_11296	278.167	239.137	224.772	1007.98	805.691	899.262	247.358	904.309	-1.86855	1.91626e-40	O-acetylhomoserine [Source:BROAD_F_oxysporum;Acc:FOXG_11296]
FOXG_01517	206.315	202.771	200.047	10.7042	12.4463	21.5823	203.044	14.9109	3.79321	2.39097e-40	conserved hypothetical protein [Source:BROAD_F_oxysporum;Acc:FOXG_01517]
FOXG_00577	12819.3	13260.5	14262.9	5999.68	6411.5	6399.66	13447.6	6270.28	1.10073	2.52078e-40	phospho-2-dehydro-3-deoxyheptonate aldolase [Source:BROAD_F_oxysporum;Acc:FOXG_00577]
FOXG_12241	5582.83	5269.83	6120.53	943.75	1223.89	1613.53	5657.73	1260.39	2.16712	3.51601e-40	conserved hypothetical protein [Source:BROAD_F_oxysporum;Acc:FOXG_12241]
FOXG_00279	16939.4	17526.4	17787.3	33091.9	33382.6	34656	17417.7	33710.2	-0.952631	3.8088e-40	6-phosphogluconate dehydrogenase [Source:BROAD_F_oxysporum;Acc:FOXG_00279]
FOXG_06052	1868.13	1794.08	1843.13	387.134	465.492	598.138	1835.11	483.588	1.92618	6.50575e-40	hypothetical protein [Source:BROAD_F_oxysporum;Acc:FOXG_06052]
FOXG_08321	203.236	203.873	187.684	806.38	639.74	717.354	198.264	721.158	-1.86209	6.51914e-40	hypothetical protein [Source:BROAD_F_oxysporum;Acc:FOXG_08321]
FOXG_05123	3100.89	3130.82	3405.29	1019.57	1052.96	1299.05	3212.33	1123.86	1.51619	8.79497e-40	hypothetical protein [Source:BROAD_F_oxysporum;Acc:FOXG_05123]
FOXG_12998	276.114	263.381	284.336	24.9764	19.9141	43.1646	274.61	29.3517	3.24973	9.11529e-40	conserved hypothetical protein [Source:BROAD_F_oxysporum;Acc:FOXG_12998]
FOXG_07089	53.3751	57.3047	67.4315	407.65	331.901	324.762	59.3705	354.771	-2.58201	9.40449e-40	conserved hypothetical protein [Source:BROAD_F_oxysporum;Acc:FOXG_07089]
FOXG_11432	1030.55	900.345	1180.05	218.543	197.481	288.792	1036.98	234.939	2.14602	1.06872e-39	conserved hypothetical protein [Source:BROAD_F_oxysporum;Acc:FOXG_11432]
FOXG_06228	4484.54	4485.2	4176.26	9905.81	9835.07	8921.71	4382	9554.19	-1.12459	1.2212e-39	Beta-tubulin [Source:UniProtKB/TrEMBL;Acc:Q64F21]
FOXG_06816	62.6131	68.3249	62.9361	320.233	337.71	321.679	64.6247	326.54	-2.33796	1.22875e-39	conserved hypothetical protein [Source:BROAD_F_oxysporum;Acc:FOXG_06816]
novel.234	821.156	727.329	710.279	2644.82	2561.45	3735.79	752.921	2980.69	-1.98433	1.25145e-39	PF13976:GAG-pre-integrase domain|PF14223:gag-polypeptide of LTR copia-type|PF00665:Integrase core domain
FOXG_01362	1756.25	1667.35	1861.11	691.311	672.93	751.269	1761.57	705.17	1.3218	1.28651e-39	conserved hypothetical protein [Source:BROAD_F_oxysporum;Acc:FOXG_01362]
FOXG_06248	6307.5	6008.18	5908.12	2172.05	2237.02	2679.29	6074.6	2362.78	1.36289	1.81167e-39	conserved hypothetical protein [Source:BROAD_F_oxysporum;Acc:FOXG_06248]
FOXG_08969	990.519	1050.22	1062.05	373.754	348.496	293.93	1034.26	338.727	1.60786	1.81451e-39	Bifunctional dethiobiotin synthetase/adenosylmethionine-8-amino-7-oxononanoate aminotransferase [Source:UniProtKB/TrEMBL;Acc:E6PBQ4]
FOXG_04407	517.328	478.274	465.277	1230.09	1340.05	1425.46	486.96	1331.87	-1.45058	2.31037e-39	conserved hypothetical protein [Source:BROAD_F_oxysporum;Acc:FOXG_04407]
FOXG_08359	5300.56	5079.18	5541.75	2089.99	2354.84	2407.97	5307.16	2284.26	1.21637	2.4479e-39	conserved hypothetical protein [Source:BROAD_F_oxysporum;Acc:FOXG_08359]
FOXG_15704	803.706	763.696	768.719	277.416	284.605	264.126	778.707	275.383	1.49857	2.52841e-39	predicted protein [Source:BROAD_F_oxysporum;Acc:FOXG_15704]
FOXG_04454	272.008	276.605	349.52	46.3847	48.1257	47.2755	299.378	47.262	2.66213	4.19937e-39	hypothetical protein similar to response regulator receiver domain protein [Source:BROAD_F_oxysporum;Acc:FOXG_04454]
FOXG_03160	2710.84	2564.39	2760.2	1167.65	1259.57	1210.66	2678.47	1212.62	1.1431	9.93603e-39	conserved hypothetical protein [Source:BROAD_F_oxysporum;Acc:FOXG_03160]
novel.281	245.32	243.545	257.364	22.3003	36.5092	36.9982	248.743	31.9359	2.96455	1.07132e-38	-
FOXG_02019	4583.08	4470.87	4285.27	10432.1	9882.36	9067.64	4446.41	9794.04	-1.1393	1.87132e-38	ATP-dependent RNA helicase DED1 [Source:BROAD_F_oxysporum;Acc:FOXG_02019]
FOXG_10359	4144.78	4047.7	5230.44	1443.28	1236.33	1035.95	4474.31	1238.52	1.85241	1.89136e-38	conserved hypothetical protein [Source:BROAD_F_oxysporum;Acc:FOXG_10359]
FOXG_00376	2186.33	2189.7	2224.12	4498.42	4664.04	4331.87	2200.05	4498.11	-1.03199	2.11313e-38	hypothetical protein similar to dipeptidyl peptidase III [Source:BROAD_F_oxysporum;Acc:FOXG_00376]
FOXG_13953	55588.2	54827.4	58723.9	29643.4	28031.6	28997.3	56379.8	28890.8	0.964575	2.19043e-38	conserved hypothetical protein [Source:BROAD_F_oxysporum;Acc:FOXG_13953]
novel.308	809.865	809.98	813.674	209.623	229.842	283.653	811.173	241.039	1.75438	2.33525e-38	-
FOXG_04929	2434.73	2471.82	2804.03	1049.01	997.364	1098.64	2570.19	1048.34	1.2942	2.35055e-38	predicted protein [Source:BROAD_F_oxysporum;Acc:FOXG_04929]
FOXG_15455	720.564	832.021	963.147	220.327	226.523	247.682	838.577	231.511	1.85764	2.37355e-38	conserved hypothetical protein [Source:BROAD_F_oxysporum;Acc:FOXG_15455]
FOXG_10920	463.953	461.744	464.154	90.0934	100.4	130.521	463.284	107.005	2.12081	2.7953e-38	conserved hypothetical protein [Source:BROAD_F_oxysporum;Acc:FOXG_10920]
FOXG_07914	402.366	352.644	330.414	75.8212	62.2315	79.135	361.808	72.3959	2.32704	2.84313e-38	hypothetical protein similar to high-affinity iron ion transporter FtrA [Source:BROAD_F_oxysporum;Acc:FOXG_07914]
FOXG_08431	841.685	735.043	710.279	2179.19	1966.52	1920.82	762.336	2022.18	-1.40691	4.51718e-38	conserved hypothetical protein [Source:BROAD_F_oxysporum;Acc:FOXG_08431]
FOXG_00381	323.33	310.768	264.107	980.323	926.005	1160.3	299.402	1022.21	-1.76968	5.0443e-38	conserved hypothetical protein [Source:BROAD_F_oxysporum;Acc:FOXG_00381]
FOXG_03171	1972.83	1709.22	1857.74	620.841	684.547	748.186	1846.6	684.525	1.43279	6.81974e-38	conserved hypothetical protein [Source:BROAD_F_oxysporum;Acc:FOXG_03171]
FOXG_12806	323.33	336.114	247.249	1083.8	1006.49	1254.86	302.231	1115.05	-1.8818	9.14042e-38	conserved hypothetical protein [Source:BROAD_F_oxysporum;Acc:FOXG_12806]
FOXG_13157	4833.53	5348.07	5203.47	2413.79	2502.54	2430.58	5128.36	2448.97	1.06614	9.16948e-38	hypothetical protein similar to aspartate aminotransferase [Source:BROAD_F_oxysporum;Acc:FOXG_13157]
FOXG_05805	1937.93	1761.02	1846.5	795.676	828.924	772.851	1848.48	799.15	1.20935	1.25335e-37	conserved hypothetical protein [Source:BROAD_F_oxysporum;Acc:FOXG_05805]
FOXG_01284	19394.7	19959.7	19865.3	10705.1	10713.8	10392.4	19739.9	10603.7	0.896488	1.31195e-37	cerevisin precursor [Source:BROAD_F_oxysporum;Acc:FOXG_01284]
FOXG_07684	1523.24	1452.45	1400.33	3932.89	3253.46	3796.43	1458.68	3660.93	-1.32717	1.48621e-37	conserved hypothetical protein [Source:BROAD_F_oxysporum;Acc:FOXG_07684]
novel.230	451.636	515.743	538.328	1470.04	1559.11	1933.16	501.902	1654.1	-1.72058	2.12132e-37	-
FOXG_04562	177.575	190.648	107.89	783.188	743.459	800.6	158.705	775.749	-2.28717	2.31011e-37	predicted protein [Source:BROAD_F_oxysporum;Acc:FOXG_04562]
FOXG_01756	581.994	616.026	572.044	1548.54	2046.17	1758.44	590.021	1784.38	-1.5969	2.41062e-37	conserved hypothetical protein [Source:BROAD_F_oxysporum;Acc:FOXG_01756]
FOXG_03670	632.29	667.82	677.687	140.046	202.46	147.993	659.266	163.5	2.00728	2.68971e-37	conserved hypothetical protein [Source:BROAD_F_oxysporum;Acc:FOXG_03670]
FOXG_02233	18034.6	17902.2	19273.1	39439.5	39082.2	45413.2	18403.3	41311.6	-1.16656	3.51556e-37	triosephosphate isomerase [Source:BROAD_F_oxysporum;Acc:FOXG_02233]
FOXG_07804	1131.14	1212.22	1090.14	462.063	450.556	418.285	1144.5	443.635	1.36623	3.56436e-37	hypothetical protein similar to arginine biosynthesis bifunctional protein ArgJ [Source:BROAD_F_oxysporum;Acc:FOXG_07804]
FOXG_11062	6174.07	6249.52	6191.34	2995.38	3241.02	3152.04	6204.97	3129.48	0.987452	3.596e-37	conserved hypothetical protein [Source:BROAD_F_oxysporum;Acc:FOXG_11062]
FOXG_05355	596.364	553.211	472.021	1573.51	1468.66	1455.26	540.532	1499.15	-1.47087	4.4985e-37	Delta(24(24(1)))-sterol reductase [Source:BROAD_F_oxysporum;Acc:FOXG_05355]
FOXG_06252	2689.29	3008.5	2961.37	1248.82	1139.25	1027.73	2886.38	1138.6	1.34121	6.70221e-37	electron transfer flavoprotein subunit beta [Source:BROAD_F_oxysporum;Acc:FOXG_06252]
FOXG_00614	501.932	509.13	500.117	1494.12	1272.84	1274.38	503.726	1347.12	-1.41934	6.74718e-37	predicted protein [Source:BROAD_F_oxysporum;Acc:FOXG_00614]
FOXG_03471	10039.7	10422.8	10077.6	3670.64	3085.85	2408.99	10180	3055.16	1.73608	1.0772e-36	serine hydroxymethyltransferase [Source:BROAD_F_oxysporum;Acc:FOXG_03471]
FOXG_08166	1708	1563.76	1785.81	663.658	649.697	724.548	1685.86	679.301	1.31237	1.10654e-36	predicted protein [Source:BROAD_F_oxysporum;Acc:FOXG_08166]
novel.624	8543.1	7398.92	8666.07	3453.88	3506.54	3751.21	8202.7	3570.54	1.20014	1.59636e-36	-
FOXG_05930	6991.12	6521.72	7406.23	2910.64	2957.24	3305.17	6973.02	3057.68	1.18965	1.62643e-36	ubiquitin-conjugating enzyme E2-21 kDa 3 [Source:BROAD_F_oxysporum;Acc:FOXG_05930]
FOXG_11180	169.363	178.526	210.162	14.2722	18.2546	15.4159	186.017	15.9809	3.5351	2.09331e-36	predicted protein [Source:BROAD_F_oxysporum;Acc:FOXG_11180]
FOXG_00878	684.639	555.415	674.315	168.591	195.822	178.825	638.123	181.079	1.81636	2.49013e-36	conserved hypothetical protein [Source:BROAD_F_oxysporum;Acc:FOXG_00878]
FOXG_00916	4678.54	4615.23	4664.01	2271.96	2422.88	2383.3	4652.59	2359.38	0.979621	2.73009e-36	zinc/cadmium resistance protein [Source:BROAD_F_oxysporum;Acc:FOXG_00916]
FOXG_12240	14863.9	14238	16201.5	3216.6	3992.77	5135.56	15101.2	4114.98	1.87596	3.08896e-36	hypothetical protein similar to mfs-multidrug-resistance transporter [Source:BROAD_F_oxysporum;Acc:FOXG_12240]
FOXG_12949	179.628	173.016	183.189	19.6243	13.2761	14.3882	178.611	15.7628	3.50207	4.02616e-36	predicted protein [Source:BROAD_F_oxysporum;Acc:FOXG_12949]
FOXG_13475	2385.46	2359.41	2373.59	4722.32	4756.15	5203.39	2372.82	4893.95	-1.04417	4.84218e-36	conserved hypothetical protein [Source:BROAD_F_oxysporum;Acc:FOXG_13475]
FOXG_02991	619.973	634.76	630.485	188.215	193.333	228.156	628.406	203.234	1.63181	9.5339e-36	hypothetical protein similar to monocarboxylate transporter [Source:BROAD_F_oxysporum;Acc:FOXG_02991]
FOXG_10397	2472.71	2325.25	2699.51	817.976	968.322	1013.34	2499.15	933.213	1.4216	1.17848e-35	hypothetical protein [Source:BROAD_F_oxysporum;Acc:FOXG_10397]
novel.457	397.234	439.704	474.268	87.4173	58.9125	100.717	437.069	82.3491	2.41654	1.50552e-35	-
FOXG_02917	225.818	171.914	207.914	12.4882	23.2331	17.4714	201.882	17.7309	3.50214	1.53734e-35	conserved hypothetical protein [Source:BROAD_F_oxysporum;Acc:FOXG_02917]
FOXG_03046	1870.18	1954.97	1944.28	839.385	861.284	920.844	1923.14	873.838	1.13864	1.57926e-35	conserved hypothetical protein [Source:BROAD_F_oxysporum;Acc:FOXG_03046]
FOXG_13281	171.416	155.384	166.331	9.81215	7.46778	4.11091	164.377	7.13028	4.50318	1.67579e-35	conserved hypothetical protein [Source:BROAD_F_oxysporum;Acc:FOXG_13281]
FOXG_06169	89.3007	65.0188	62.9361	386.242	332.731	396.703	72.4185	371.892	-2.35516	1.6838e-35	conserved hypothetical protein [Source:BROAD_F_oxysporum;Acc:FOXG_06169]
FOXG_01638	439.318	504.722	532.709	141.83	124.463	109.967	492.25	125.42	1.96909	1.7504e-35	conserved hypothetical protein [Source:BROAD_F_oxysporum;Acc:FOXG_01638]
FOXG_10443	769.834	779.124	623.742	2045.39	1842.05	2076.01	724.233	1987.82	-1.45589	1.99623e-35	Chitin synthase class II [Source:UniProtKB/TrEMBL;Acc:Q5YCX0]
FOXG_13643	1127.04	1130.67	1218.26	277.416	386.665	380.259	1158.66	348.114	1.73521	2.23562e-35	predicted protein [Source:BROAD_F_oxysporum;Acc:FOXG_13643]
FOXG_01495	215.553	191.75	216.905	21.4083	4.97852	12.3327	208.07	12.9065	4.02332	2.5408e-35	glucose N-acetyltransferase 1 [Source:BROAD_F_oxysporum;Acc:FOXG_01495]
FOXG_09710	576.862	584.067	599.017	157.886	200.8	158.27	586.649	172.319	1.76366	3.02815e-35	conserved hypothetical protein [Source:BROAD_F_oxysporum;Acc:FOXG_09710]
FOXG_07977	8903.38	8937.33	9424.68	4718.75	4292.31	4603.19	9088.46	4538.09	1.00204	4.05121e-35	conserved hypothetical protein [Source:BROAD_F_oxysporum;Acc:FOXG_07977]
FOXG_04516	401.34	357.053	337.158	69.5771	81.3158	48.3032	365.183	66.3987	2.44923	4.24131e-35	conserved hypothetical protein [Source:BROAD_F_oxysporum;Acc:FOXG_04516]
FOXG_07654	1832.2	1834.85	1553.17	4725.89	4598.49	3995.81	1740.08	4440.06	-1.35143	4.56464e-35	conserved hypothetical protein [Source:BROAD_F_oxysporum;Acc:FOXG_07654]
FOXG_13837	605.603	586.271	590.026	1346.94	1435.47	1328.85	593.967	1370.42	-1.20638	4.69133e-35	conserved hypothetical protein [Source:BROAD_F_oxysporum;Acc:FOXG_13837]
FOXG_11179	237.109	173.016	229.267	18.7323	26.5521	21.5823	213.131	22.2889	3.25251	5.66767e-35	conserved hypothetical protein [Source:BROAD_F_oxysporum;Acc:FOXG_11179]
novel.551	381.838	357.053	402.341	1560.13	1369.09	2308.28	380.41	1745.83	-2.19761	5.72203e-35	PF07727:Reverse transcriptase (RNA-dependent DNA polymerase)
FOXG_16988	221.712	213.791	234.886	1.78403	4.14877	2.05546	223.463	2.66275	6.35821	7.62906e-35	hypothetical protein similar to reductase [Source:BROAD_F_oxysporum;Acc:FOXG_16988]
novel.577	751.358	797.858	874.362	287.228	247.267	220.962	807.859	251.819	1.6794	8.87656e-35	-
FOXG_03430	1068.53	1146.09	1236.24	2816.09	2775.53	3351.42	1150.29	2981.01	-1.37373	1.12014e-34	conserved hypothetical protein [Source:BROAD_F_oxysporum;Acc:FOXG_03430]
FOXG_12324	172.443	167.506	157.34	8.02812	5.80827	2.05546	165.763	5.29728	4.93132	1.2369e-34	hypothetical protein similar to arginine transporter [Source:BROAD_F_oxysporum;Acc:FOXG_12324]
FOXG_09760	715.432	805.572	709.155	1793.84	1685.23	1720.42	743.386	1733.16	-1.22135	1.2606e-34	hypothetical protein similar to mfs-multidrug-resistance transporter [Source:BROAD_F_oxysporum;Acc:FOXG_09760]
FOXG_11536	1177.33	1107.52	1063.17	464.739	437.28	467.616	1116.01	456.545	1.29055	1.3657e-34	hypothetical protein similar to acetoacetyl-CoA synthase [Source:BROAD_F_oxysporum;Acc:FOXG_11536]
FOXG_16901	2036.47	2018.89	2255.58	13.3802	22.4033	3.08318	2103.65	12.9556	7.32473	1.4729e-34	conserved hypothetical protein [Source:BROAD_F_oxysporum;Acc:FOXG_16901]
FOXG_08545	594.312	532.273	467.525	1661.82	1545	1390.52	531.37	1532.45	-1.52756	1.6002e-34	nucleolar GTP-binding protein 1 [Source:BROAD_F_oxysporum;Acc:FOXG_08545]
FOXG_09029	4380.87	4027.86	4508.92	1822.38	1941.62	1595.03	4305.88	1786.35	1.26862	1.81695e-34	hypothetical protein similar to ThiJ/PfpI family protein [Source:BROAD_F_oxysporum;Acc:FOXG_09029]
FOXG_03573	197.077	197.26	165.207	958.023	887.006	629.997	186.515	825.009	-2.14548	2.1839e-34	conserved hypothetical protein [Source:BROAD_F_oxysporum;Acc:FOXG_03573]
FOXG_03344	2179.14	2320.84	2354.48	795.676	702.801	947.565	2284.82	815.347	1.48815	2.20341e-34	hypothetical protein [Source:BROAD_F_oxysporum;Acc:FOXG_03344]
FOXG_05236	4750.39	4995.43	5047.25	9152.95	9361.28	9602.06	4931.02	9372.1	-0.926519	2.22224e-34	conserved hypothetical protein [Source:BROAD_F_oxysporum;Acc:FOXG_05236]
FOXG_03641	1408.28	1394.05	1218.26	3419.98	3345.57	2959.86	1340.2	3241.8	-1.27436	2.36818e-34	hypothetical protein similar to nonsense-mediated mRNA decay protein Nmd5 [Source:BROAD_F_oxysporum;Acc:FOXG_03641]
FOXG_08145	1410.34	1247.48	1531.82	428.167	473.789	533.391	1396.54	478.449	1.54671	2.36996e-34	hypothetical protein similar to FAD-dependent sulfhydryl oxidase Erv1 [Source:BROAD_F_oxysporum;Acc:FOXG_08145]
FOXG_03301	13791.3	14031.9	13760.5	6707.94	6918.48	7508.58	13861.3	7045	0.976532	3.94196e-34	aspartate-semialdehyde dehydrogenase [Source:BROAD_F_oxysporum;Acc:FOXG_03301]
FOXG_10578	557.36	547.701	506.86	1387.97	1263.71	1257.94	537.307	1303.21	-1.27797	4.37408e-34	conserved hypothetical protein [Source:BROAD_F_oxysporum;Acc:FOXG_10578]
FOXG_12753	1765.49	1720.24	1768.95	726.099	765.033	618.692	1751.56	703.275	1.31481	5.06147e-34	conserved hypothetical protein [Source:BROAD_F_oxysporum;Acc:FOXG_12753]
FOXG_11520	18444.2	18832.3	19262.9	5776.68	5024.99	3291.81	18846.5	4697.83	2.00399	6.48733e-34	NAD-specific glutamate dehydrogenase [Source:BROAD_F_oxysporum;Acc:FOXG_11520]
FOXG_03444	390.049	381.297	327.043	82.0652	67.21	93.5232	366.13	80.9328	2.18486	7.26064e-34	conserved hypothetical protein [Source:BROAD_F_oxysporum;Acc:FOXG_03444]
novel.181	533.751	511.334	587.778	146.29	112.017	83.246	544.288	113.851	2.2519	8.17473e-34	-
FOXG_10653	928.933	1016.06	930.555	2204.17	2017.13	2222.98	958.515	2148.09	-1.164	1.01374e-33	hypothetical protein similar to pyridine nucleotide-disulphide oxidoreductase [Source:BROAD_F_oxysporum;Acc:FOXG_10653]
novel.130	2671.84	2222.76	2154.44	950.886	823.115	844.792	2349.68	872.931	1.42874	1.01567e-33	-
FOXG_00995	850.923	794.552	895.715	332.721	328.582	320.651	847.063	327.318	1.37129	1.11646e-33	hypothetical protein similar to beclin 1 [Source:BROAD_F_oxysporum;Acc:FOXG_00995]
FOXG_15355	241.215	192.852	207.914	651.17	779.138	680.356	213.994	703.555	-1.71629	1.42263e-33	conserved hypothetical protein [Source:BROAD_F_oxysporum;Acc:FOXG_15355]
FOXG_04102	117.015	96.9772	116.881	387.134	464.662	466.588	110.291	439.461	-1.99347	1.43537e-33	conserved hypothetical protein [Source:BROAD_F_oxysporum;Acc:FOXG_04102]
FOXG_14278	11.2909	7.7141	7.86701	155.21	180.057	183.963	8.95733	173.077	-4.26347	1.70149e-33	predicted protein [Source:BROAD_F_oxysporum;Acc:FOXG_14278]
FOXG_05085	1930.74	1842.57	1882.46	3707.21	3981.16	3673.1	1885.26	3787.15	-1.00645	2.67295e-33	methionine aminopeptidase 2B [Source:BROAD_F_oxysporum;Acc:FOXG_05085]
FOXG_11101	1818.86	1628.78	1708.27	782.296	788.266	750.241	1718.63	773.601	1.15133	2.79658e-33	conserved hypothetical protein [Source:BROAD_F_oxysporum;Acc:FOXG_11101]
FOXG_07455	506.037	437.5	550.691	88.3093	102.06	137.716	498.076	109.362	2.19347	3.51253e-33	conserved hypothetical protein [Source:BROAD_F_oxysporum;Acc:FOXG_07455]
FOXG_11102	3591.53	3275.19	3260.31	8039.72	6892.76	7321.53	3375.68	7418	-1.13571	3.82372e-33	hypothetical protein similar to aminopeptidase B [Source:BROAD_F_oxysporum;Acc:FOXG_11102]
FOXG_06051	19765.2	19538.7	18649.3	5126.4	5573.45	7638.07	19317.7	6112.64	1.66029	4.19403e-33	hypothetical protein similar to FAD-dependent oxidoreductase [Source:BROAD_F_oxysporum;Acc:FOXG_06051]
FOXG_01540	2403.93	2331.86	2285.93	5501.94	5005.9	4683.36	2340.57	5063.73	-1.1134	4.20711e-33	conserved hypothetical protein [Source:BROAD_F_oxysporum;Acc:FOXG_01540]
FOXG_11142	508.09	415.459	451.791	132.018	132.761	129.494	458.447	131.424	1.80266	4.52181e-33	hypothetical protein similar to Zfr1 [Source:BROAD_F_oxysporum;Acc:FOXG_11142]
FOXG_01607	204.263	146.568	141.606	773.376	691.185	595.054	164.146	686.538	-2.06242	4.76013e-33	conserved hypothetical protein [Source:BROAD_F_oxysporum;Acc:FOXG_01607]
FOXG_01981	882.743	973.078	837.275	1966.89	2026.26	2094.51	897.699	2029.22	-1.17645	4.86059e-33	conserved hypothetical protein [Source:BROAD_F_oxysporum;Acc:FOXG_01981]
FOXG_00145	1860.94	1822.73	1955.51	610.137	689.525	805.739	1879.73	701.8	1.42271	5.03576e-33	hypothetical protein [Source:BROAD_F_oxysporum;Acc:FOXG_00145]
FOXG_05306	13796.4	12258.8	13119.9	32538	30712.5	40710.4	13058.4	34653.6	-1.40797	6.46637e-33	hypothetical protein [Source:BROAD_F_oxysporum;Acc:FOXG_05306]
FOXG_09292	635.369	541.089	573.168	177.511	116.165	132.577	583.209	142.084	2.038	6.51613e-33	peroxisomal biogenesis factor 6 [Source:BROAD_F_oxysporum;Acc:FOXG_09292]
FOXG_07803	973.07	1106.42	1084.52	383.566	412.387	327.845	1054.67	374.599	1.49062	6.63332e-33	imidazoleglycerol-phosphate dehydratase [Source:BROAD_F_oxysporum;Acc:FOXG_07803]
FOXG_08983	1225.58	1277.23	1308.17	541.452	583.317	557.029	1270.33	560.599	1.17957	6.99869e-33	nucleotide-binding protein 2 [Source:BROAD_F_oxysporum;Acc:FOXG_08983]
FOXG_05453	762.649	683.249	674.315	2037.36	1858.65	2556.99	706.737	2151	-1.6048	8.72086e-33	conserved hypothetical protein [Source:BROAD_F_oxysporum;Acc:FOXG_05453]
FOXG_16890	1324.11	1204.5	1278.95	545.02	571.7	549.834	1269.19	555.518	1.19181	8.88955e-33	conserved hypothetical protein [Source:BROAD_F_oxysporum;Acc:FOXG_16890]
FOXG_12943	5131.2	5049.43	5434.98	1421.87	1418.88	2043.12	5205.2	1627.96	1.67775	1.02394e-32	conserved hypothetical protein [Source:BROAD_F_oxysporum;Acc:FOXG_12943]
FOXG_03084	1258.42	1191.28	1365.49	482.579	531.872	538.529	1271.73	517.66	1.29698	1.08519e-32	conserved hypothetical protein [Source:BROAD_F_oxysporum;Acc:FOXG_03084]
FOXG_12894	397.234	459.54	475.392	123.098	128.612	131.549	444.055	127.753	1.79734	1.168e-32	hypothetical protein similar to Brt1 [Source:BROAD_F_oxysporum;Acc:FOXG_12894]
FOXG_13373	1941.01	1985.83	2209.51	748.399	843.03	900.29	2045.45	830.573	1.30075	1.27038e-32	hypothetical protein similar to N amino acid permease [Source:BROAD_F_oxysporum;Acc:FOXG_13373]
FOXG_11379	157.046	157.588	158.464	3.56805	4.97852	13.3605	157.699	7.30235	4.486	1.27936e-32	conserved hypothetical protein [Source:BROAD_F_oxysporum;Acc:FOXG_11379]
FOXG_03314	284.325	289.83	285.46	67.793	64.7208	48.3032	286.538	60.2723	2.24139	1.43451e-32	hypothetical protein similar to D-arabinitol dehydrogenase [Source:BROAD_F_oxysporum;Acc:FOXG_03314]
FOXG_05738	2626.67	2857.52	2728.73	1189.95	926.835	910.567	2737.64	1009.12	1.43944	1.52077e-32	conserved hypothetical protein [Source:BROAD_F_oxysporum;Acc:FOXG_05738]
FOXG_02777	5844.58	5710.64	5806.98	2327.26	1954.07	1575.51	5787.4	1952.28	1.56725	1.55325e-32	conserved hypothetical protein [Source:BROAD_F_oxysporum;Acc:FOXG_02777]
FOXG_12766	1262.53	1267.32	1375.6	561.969	569.211	590.944	1301.82	574.041	1.1816	1.57463e-32	conserved hypothetical protein [Source:BROAD_F_oxysporum;Acc:FOXG_12766]
FOXG_13804	1368.25	1325.72	1350.88	579.809	604.061	638.219	1348.28	607.363	1.15134	1.69569e-32	conserved hypothetical protein [Source:BROAD_F_oxysporum;Acc:FOXG_13804]
FOXG_00100	372.6	351.542	393.351	105.258	77.9968	72.9687	372.497	85.4077	2.12193	1.71913e-32	hypothetical protein similar to amino transferase [Source:BROAD_F_oxysporum;Acc:FOXG_00100]
FOXG_00837	135.491	117.915	120.253	431.735	414.047	423.424	124.553	423.068	-1.7625	1.88676e-32	ATP-dependent RNA helicase ROK1 [Source:BROAD_F_oxysporum;Acc:FOXG_00837]
FOXG_01411	315.119	285.422	315.804	886.661	787.436	973.258	305.448	882.452	-1.52934	1.89552e-32	hypothetical protein similar to conserved transmembrane protein [Source:BROAD_F_oxysporum;Acc:FOXG_01411]
FOXG_03887	519.381	563.129	550.691	173.051	136.909	113.05	544.4	141.003	1.94493	1.93399e-32	hypothetical protein similar to acyl-CoA oxidase [Source:BROAD_F_oxysporum;Acc:FOXG_03887]
FOXG_14493	636.396	595.088	686.678	97.2295	146.866	173.686	639.387	139.261	2.20255	2.26978e-32	predicted protein [Source:BROAD_F_oxysporum;Acc:FOXG_14493]
FOXG_00788	4087.3	3796.44	3610.96	8198.5	7491.01	7937.14	3831.57	7875.55	-1.03926	2.50405e-32	conserved hypothetical protein [Source:BROAD_F_oxysporum;Acc:FOXG_00788]
FOXG_00332	235.056	284.32	260.735	48.1687	54.7637	39.0537	260.037	47.3287	2.4487	2.62179e-32	predicted protein [Source:BROAD_F_oxysporum;Acc:FOXG_00332]
FOXG_05326	729.802	832.021	669.82	248.872	243.118	200.407	743.881	230.799	1.68574	2.71183e-32	conserved hypothetical protein [Source:BROAD_F_oxysporum;Acc:FOXG_05326]
FOXG_01533	1928.69	1973.71	1992.6	789.432	873.73	938.316	1965	867.159	1.18088	2.94738e-32	hypothetical protein similar to pyruvate dehydrogenase kinase [Source:BROAD_F_oxysporum;Acc:FOXG_01533]
FOXG_03014	5634.16	4962.37	4680.87	12345.5	12428.9	15470.4	5092.47	13414.9	-1.39722	3.893e-32	conserved hypothetical protein [Source:BROAD_F_oxysporum;Acc:FOXG_03014]
FOXG_08438	1149.62	1243.07	1178.93	499.528	523.574	539.557	1190.54	520.886	1.19296	4.81066e-32	conserved hypothetical protein [Source:BROAD_F_oxysporum;Acc:FOXG_08438]
FOXG_10540	660.004	662.31	627.113	1432.57	1470.32	1372.02	649.809	1424.97	-1.13303	4.85938e-32	conserved hypothetical protein [Source:BROAD_F_oxysporum;Acc:FOXG_10540]
FOXG_09273	5265.66	4792.66	4978.69	13288.3	11372.6	10641.1	5012.34	11767.3	-1.23124	5.11109e-32	adenosylhomocysteinase [Source:BROAD_F_oxysporum;Acc:FOXG_09273]
FOXG_07062	50.2958	37.4685	33.7158	227.463	269.67	250.766	40.4933	249.3	-2.6169	5.24061e-32	predicted protein [Source:BROAD_F_oxysporum;Acc:FOXG_07062]
FOXG_07277	68.7718	62.8148	56.1929	305.069	282.116	377.176	62.5932	321.454	-2.35633	7.02358e-32	conserved hypothetical protein [Source:BROAD_F_oxysporum;Acc:FOXG_07277]
FOXG_07685	715.432	687.657	564.177	1826.84	1690.21	2097.59	655.755	1871.55	-1.51192	7.91674e-32	hypothetical protein [Source:BROAD_F_oxysporum;Acc:FOXG_07685]
FOXG_04072	820.129	849.653	737.251	1802.76	1747.46	1900.27	802.344	1816.83	-1.17853	8.89936e-32	hypothetical protein similar to condensin complex subunit 1 [Source:BROAD_F_oxysporum;Acc:FOXG_04072]
FOXG_16588	32503.4	31431.6	34174.3	18039.2	17633.9	17993.5	32703.1	17888.9	0.870373	9.66307e-32	conserved hypothetical protein [Source:BROAD_F_oxysporum;Acc:FOXG_16588]
FOXG_13663	3612.06	3758.97	3930.13	1545.86	1569.89	1847.85	3767.05	1654.54	1.18767	1.21084e-31	monothiol glutaredoxin-5, mitochondrial precursor [Source:BROAD_F_oxysporum;Acc:FOXG_13663]
FOXG_05736	3673.65	3667.5	3795.27	1071.31	1132.61	1537.48	3712.14	1247.13	1.5747	1.37882e-31	conserved hypothetical protein [Source:BROAD_F_oxysporum;Acc:FOXG_05736]
FOXG_03164	1346.7	1311.4	1247.48	2958.81	2817.01	3451.11	1301.86	3075.64	-1.23973	2.23614e-31	cell cycle protein kinase DBF2 [Source:BROAD_F_oxysporum;Acc:FOXG_03164]
novel.727	340.78	255.667	295.575	1018.68	957.535	1348.38	297.341	1108.2	-1.89621	2.34839e-31	PF14223:gag-polypeptide of LTR copia-type|PF07727:Reverse transcriptase (RNA-dependent DNA polymerase)|PF00665:Integrase core domain|PF13976:GAG-pre-integrase domain|PF00078:Reverse transcriptase (RNA-dependent DNA polymerase)
FOXG_08575	312.039	335.012	351.768	76.7132	89.6134	61.6637	332.94	75.9967	2.12276	2.41817e-31	conserved hypothetical protein [Source:BROAD_F_oxysporum;Acc:FOXG_08575]
FOXG_03315	770.86	764.798	763.1	325.585	294.562	303.18	766.253	307.776	1.31611	2.4786e-31	hypothetical protein [Source:BROAD_F_oxysporum;Acc:FOXG_03315]
FOXG_13671	2278.71	2368.23	2236.48	1040.98	1109.38	933.177	2294.47	1027.85	1.15743	2.55413e-31	hypothetical protein similar to N-acetyl-gamma-glutamyl-phosphate reductase [Source:BROAD_F_oxysporum;Acc:FOXG_13671]
FOXG_08316	420.842	392.317	442.8	108.826	127.782	90.4401	418.653	109.016	1.93473	2.84096e-31	conserved hypothetical protein [Source:BROAD_F_oxysporum;Acc:FOXG_08316]
FOXG_08160	3056.75	3017.31	3013.06	1615.44	1611.38	1603.26	3029.04	1610.02	0.911769	3.21227e-31	hypothetical protein similar to mitochondrial RNA splicing protein [Source:BROAD_F_oxysporum;Acc:FOXG_08160]
FOXG_11699	291.51	307.462	293.327	793	745.948	728.659	297.433	755.869	-1.34605	3.70971e-31	conserved hypothetical protein [Source:BROAD_F_oxysporum;Acc:FOXG_11699]
FOXG_05165	1774.72	1627.67	1833.01	3689.37	3579.56	4067.75	1745.14	3778.89	-1.11435	3.84565e-31	spermidine synthase [Source:BROAD_F_oxysporum;Acc:FOXG_05165]
FOXG_03169	1755.22	1783.06	1949.89	705.583	752.586	847.876	1829.39	768.682	1.25185	4.26198e-31	predicted protein [Source:BROAD_F_oxysporum;Acc:FOXG_03169]
FOXG_09532	538.884	608.312	568.672	168.591	182.546	209.656	571.956	186.931	1.61603	4.38769e-31	hypothetical protein similar to peroxisomal carrier protein [Source:BROAD_F_oxysporum;Acc:FOXG_09532]
FOXG_11451	6202.81	5437.34	5284.38	17547.7	15096.5	12960.7	5641.51	15201.6	-1.43006	4.41157e-31	elongation factor 3 [Source:BROAD_F_oxysporum;Acc:FOXG_11451]
FOXG_03419	3216.88	3520.93	3140.06	7068.32	6590.73	6437.69	3292.62	6698.91	-1.02476	5.21019e-31	eukaryotic peptide chain release factor GTP-binding subunit [Source:BROAD_F_oxysporum;Acc:FOXG_03419]
FOXG_12922	105.724	103.589	106.767	394.27	351.815	435.757	105.36	393.947	-1.90102	6.07205e-31	conserved hypothetical protein [Source:BROAD_F_oxysporum;Acc:FOXG_12922]
FOXG_10446	552.227	551.007	565.301	166.807	195.822	204.518	556.178	189.049	1.5582	6.61052e-31	conserved hypothetical protein [Source:BROAD_F_oxysporum;Acc:FOXG_10446]
FOXG_09425	544.016	565.333	557.434	189.107	169.27	208.629	555.594	189.002	1.55909	6.68097e-31	conserved hypothetical protein [Source:BROAD_F_oxysporum;Acc:FOXG_09425]
novel.640	733.908	839.735	792.32	256.9	219.885	297.013	788.654	257.933	1.61579	6.68843e-31	-
FOXG_01195	781.125	742.757	727.137	1680.55	1600.59	1859.16	750.339	1713.44	-1.19037	7.69965e-31	hypothetical protein [Source:BROAD_F_oxysporum;Acc:FOXG_01195]
FOXG_08094	558.386	500.314	483.259	164.13	115.336	143.882	513.987	141.116	1.86762	7.7955e-31	hypothetical protein similar to succinyl-CoA:3-ketoacid-coenzyme A transferase [Source:BROAD_F_oxysporum;Acc:FOXG_08094]
FOXG_05041	3929.23	3623.42	3710.98	1556.56	1441.28	1805.72	3754.54	1601.19	1.2304	7.9342e-31	conserved hypothetical protein [Source:BROAD_F_oxysporum;Acc:FOXG_05041]
FOXG_00172	6367.04	6509.6	6108.17	2960.59	2954.75	2424.41	6328.27	2779.92	1.1863	8.03789e-31	carbamoyl-phosphate synthase arginine-specific large chain [Source:BROAD_F_oxysporum;Acc:FOXG_00172]
FOXG_00470	1022.34	1056.83	990.119	2017.73	2110.89	2063.68	1023.1	2064.1	-1.01258	8.67363e-31	conserved hypothetical protein [Source:BROAD_F_oxysporum;Acc:FOXG_00470]
FOXG_10440	2567.14	2685.61	2846.73	1060.6	1102.74	1290.83	2699.83	1151.39	1.23032	8.84262e-31	hypothetical protein similar to ribose 5-phosphate isomerase A [Source:BROAD_F_oxysporum;Acc:FOXG_10440]
FOXG_04081	6475.84	6631.92	6631.89	3683.12	3413.61	3388.42	6579.88	3495.05	0.912647	8.92369e-31	hypothetical protein [Source:BROAD_F_oxysporum;Acc:FOXG_04081]
FOXG_08846	4423.98	4160.1	4551.63	1500.37	1409.75	941.399	4378.57	1283.84	1.76908	9.38033e-31	conserved hypothetical protein [Source:BROAD_F_oxysporum;Acc:FOXG_08846]
FOXG_00468	908.404	967.568	879.981	1899.1	1975.64	2135.62	918.651	2003.45	-1.12454	1.2024e-30	conserved hypothetical protein [Source:BROAD_F_oxysporum;Acc:FOXG_00468]
FOXG_04224	2881.23	2871.85	2882.7	5224.52	5182.64	5131.45	2878.59	5179.54	-0.847489	1.35366e-30	conserved hypothetical protein [Source:BROAD_F_oxysporum;Acc:FOXG_04224]
FOXG_12829	7380.14	7458.43	7731.02	3684.02	3756.29	4129.41	7523.2	3856.57	0.964273	1.40614e-30	alanine-glyoxylate aminotransferase 1 [Source:BROAD_F_oxysporum;Acc:FOXG_12829]
novel.690	276.114	236.933	282.089	56.1969	59.7422	58.5805	265.045	58.1732	2.18774	1.43055e-30	-
FOXG_08213	1898.92	1837.06	1890.33	930.37	945.919	872.541	1875.44	916.277	1.03267	1.5065e-30	activating signal cointegrator 1 complex subunit 3 [Source:BROAD_F_oxysporum;Acc:FOXG_08213]
FOXG_08748	62.6131	67.2229	41.5828	305.961	365.921	512.836	57.1396	394.906	-2.78516	1.55505e-30	conserved hypothetical protein [Source:BROAD_F_oxysporum;Acc:FOXG_08748]
FOXG_11643	375.679	402.235	428.19	108.826	128.612	115.106	402.035	117.514	1.77213	1.76137e-30	conserved hypothetical protein [Source:BROAD_F_oxysporum;Acc:FOXG_11643]
novel.313	138.57	150.976	169.703	10.7042	11.6165	2.05546	153.083	8.12539	4.18779	1.85753e-30	-
FOXG_09375	633.317	686.555	594.521	1653.79	1506	1425.46	638.131	1528.42	-1.26036	1.89126e-30	conserved hypothetical protein [Source:BROAD_F_oxysporum;Acc:FOXG_09375]
FOXG_11592	160.125	188.444	111.262	649.386	698.652	575.528	153.277	641.189	-2.0642	2.09132e-30	conserved hypothetical protein [Source:BROAD_F_oxysporum;Acc:FOXG_11592]
FOXG_00038	710.3	742.757	684.43	2246.09	2192.21	1656.7	712.496	2031.67	-1.51227	2.27385e-30	conserved hypothetical protein [Source:BROAD_F_oxysporum;Acc:FOXG_00038]
novel.493	634.343	573.047	655.21	233.708	190.014	202.462	620.867	208.728	1.57297	2.28364e-30	-
FOXG_03128	2556.87	2639.32	2755.7	5229.88	4883.93	5303.08	2650.63	5138.96	-0.955123	2.43926e-30	conserved hypothetical protein [Source:BROAD_F_oxysporum;Acc:FOXG_03128]
FOXG_02477	39638.2	33515.5	31785	82134.8	76218.7	88029	34979.6	82127.5	-1.23132	2.53164e-30	hypothetical protein [Source:BROAD_F_oxysporum;Acc:FOXG_02477]
FOXG_00512	519.381	462.846	479.888	1139.99	1086.98	1119.2	487.372	1115.39	-1.19371	2.59861e-30	hypothetical protein similar to protein-tyrosine phosphatase [Source:BROAD_F_oxysporum;Acc:FOXG_00512]
FOXG_10213	176.549	159.792	189.932	20.5163	25.7224	24.6655	175.424	23.6347	2.89164	3.26483e-30	conserved hypothetical protein [Source:BROAD_F_oxysporum;Acc:FOXG_10213]
FOXG_16902	238.135	241.341	238.258	0.892014	3.31901	1.02773	239.245	1.74625	7.04187	3.32765e-30	Alfa-L-arabinofuranosidase [Source:UniProtKB/TrEMBL;Acc:B6F261]
FOXG_00897	942.276	959.854	994.615	396.946	401.601	440.895	965.582	413.147	1.22599	3.54144e-30	predicted protein [Source:BROAD_F_oxysporum;Acc:FOXG_00897]
FOXG_13742	2067.26	2089.42	2003.84	1035.63	1063.74	1010.26	2053.51	1036.54	0.985934	3.64976e-30	GTP cyclohydrolase-2 [Source:BROAD_F_oxysporum;Acc:FOXG_13742]
FOXG_14515	136.517	143.262	140.482	436.195	423.174	430.618	140.087	429.996	-1.61828	3.66794e-30	conserved hypothetical protein [Source:BROAD_F_oxysporum;Acc:FOXG_14515]
FOXG_09167	213.501	231.423	229.267	42.8167	43.1472	49.3309	224.73	45.0983	2.3209	3.82111e-30	predicted protein [Source:BROAD_F_oxysporum;Acc:FOXG_09167]
FOXG_00248	513.222	547.701	470.897	1221.17	1144.23	1257.94	510.607	1207.78	-1.24141	3.89126e-30	conserved hypothetical protein [Source:BROAD_F_oxysporum;Acc:FOXG_00248]
FOXG_02259	453.689	469.458	415.828	1136.43	1010.64	1164.42	446.325	1103.83	-1.30542	3.90841e-30	S-formylglutathione hydrolase [Source:BROAD_F_oxysporum;Acc:FOXG_02259]
FOXG_08114	726.723	722.921	602.388	1718.91	1576.53	1617.64	684.011	1637.7	-1.259	4.2892e-30	conserved hypothetical protein [Source:BROAD_F_oxysporum;Acc:FOXG_08114]
FOXG_06549	140.623	99.1813	102.271	472.767	463.832	640.274	114.025	525.625	-2.20047	4.40815e-30	hypothetical protein similar to response regulator receiver domain protein [Source:BROAD_F_oxysporum;Acc:FOXG_06549]
FOXG_10696	339.753	323.992	478.764	76.7132	83.8051	71.941	380.836	77.4864	2.29376	4.52606e-30	conserved hypothetical protein [Source:BROAD_F_oxysporum;Acc:FOXG_10696]
FOXG_11620	124.2	171.914	141.606	511.124	489.555	478.921	145.907	493.2	-1.75914	4.81111e-30	hypothetical protein [Source:BROAD_F_oxysporum;Acc:FOXG_11620]
FOXG_01440	623.052	617.128	648.466	1429.01	1383.2	1638.2	629.549	1483.47	-1.23596	5.2501e-30	conserved hypothetical protein [Source:BROAD_F_oxysporum;Acc:FOXG_01440]
FOXG_01937	21260.8	22207.8	22455.8	45211.7	42764.7	39558.3	21974.8	42511.5	-0.95204	5.3042e-30	hypothetical protein similar to transmembrane protein [Source:BROAD_F_oxysporum;Acc:FOXG_01937]
FOXG_05203	61836.1	60999.8	68189	17428.2	20671.6	26264.6	63675	21454.8	1.56948	6.5505e-30	conserved hypothetical protein [Source:BROAD_F_oxysporum;Acc:FOXG_05203]
FOXG_00990	652.819	686.555	619.246	238.168	229.842	263.098	652.873	243.703	1.42402	6.67451e-30	conserved hypothetical protein [Source:BROAD_F_oxysporum;Acc:FOXG_00990]
FOXG_09453	1112.67	1128.46	1085.65	2356.7	2136.62	2253.81	1108.93	2249.04	-1.01996	7.89033e-30	cell division control protein 42 [Source:BROAD_F_oxysporum;Acc:FOXG_09453]
FOXG_09184	1136.27	1154.91	1082.28	2689.42	2772.21	2285.67	1124.49	2582.43	-1.19986	8.71216e-30	hypothetical protein similar to Arc1p protein [Source:BROAD_F_oxysporum;Acc:FOXG_09184]
FOXG_00643	2326.95	2198.52	2216.25	1123.05	1107.72	1175.72	2247.24	1135.5	0.985427	9.47493e-30	hypothetical protein similar to MAP kinase kinase kinase [Source:BROAD_F_oxysporum;Acc:FOXG_00643]
FOXG_07841	3473.49	3000.78	3338.98	25454.5	27195.2	45908.6	3271.09	32852.8	-3.32815	1.02245e-29	formate dehydrogenase [Source:BROAD_F_oxysporum;Acc:FOXG_07841]
novel.325	239.162	245.749	283.212	49.0607	38.9984	59.6082	256.041	49.2225	2.38871	1.19492e-29	-
FOXG_08666	429.054	429.785	378.74	133.802	122.804	128.466	412.527	128.357	1.68533	1.23067e-29	conserved hypothetical protein [Source:BROAD_F_oxysporum;Acc:FOXG_08666]
FOXG_01671	6207.94	5804.31	6535.24	2932.94	3185.42	3180.82	6182.49	3099.73	0.996084	1.2848e-29	hypothetical protein similar to cystinosin [Source:BROAD_F_oxysporum;Acc:FOXG_01671]
FOXG_11670	136.517	188.444	153.969	13.3802	15.7653	17.4714	159.643	15.539	3.3652	1.34417e-29	conserved hypothetical protein [Source:BROAD_F_oxysporum;Acc:FOXG_11670]
FOXG_04566	180.654	128.936	196.675	11.5962	16.5951	16.4436	168.755	14.8783	3.50566	1.49488e-29	conserved hypothetical protein [Source:BROAD_F_oxysporum;Acc:FOXG_04566]
novel.85	1113.69	938.916	1203.65	385.35	272.989	277.487	1085.42	311.942	1.79835	1.50042e-29	-
FOXG_00117	302.801	293.136	315.804	81.1732	84.6349	82.2182	303.914	82.6754	1.87746	1.61105e-29	conserved hypothetical protein [Source:BROAD_F_oxysporum;Acc:FOXG_00117]
FOXG_13439	479.35	467.254	560.805	63.333	67.21	126.411	502.47	85.6512	2.56281	1.77887e-29	cytochrome c peroxidase, mitochondrial precursor [Source:BROAD_F_oxysporum;Acc:FOXG_13439]
FOXG_04076	5229.74	5103.43	5016.9	1840.22	2255.27	2385.36	5116.69	2160.28	1.2443	1.80185e-29	conserved hypothetical protein [Source:BROAD_F_oxysporum;Acc:FOXG_04076]
FOXG_02288	870.425	877.203	857.504	1738.53	1880.22	2018.46	868.377	1879.07	-1.11321	2.16518e-29	hypothetical protein [Source:BROAD_F_oxysporum;Acc:FOXG_02288]
novel.121	304.854	242.443	269.726	60.6569	43.9769	60.6359	272.341	55.0899	2.3125	2.69104e-29	-
FOXG_03336	651.793	538.885	564.177	2228.25	1926.69	1506.65	584.951	1887.2	-1.68986	3.44942e-29	prion formation protein 1 [Source:BROAD_F_oxysporum;Acc:FOXG_03336]
FOXG_12862	10410.2	10663.1	10572.1	5878.37	6127.73	6098.54	10548.5	6034.88	0.805635	4.06075e-29	saccharopine dehydrogenase [Source:BROAD_F_oxysporum;Acc:FOXG_12862]
FOXG_10680	402.366	347.134	410.208	115.07	90.4431	76.0519	386.57	93.8549	2.03814	4.71895e-29	hypothetical protein [Source:BROAD_F_oxysporum;Acc:FOXG_10680]
FOXG_13280	172.443	155.384	197.799	20.5163	14.1058	26.7209	175.209	20.4477	3.11779	5.03525e-29	conserved hypothetical protein [Source:BROAD_F_oxysporum;Acc:FOXG_13280]
FOXG_08979	12317.3	11891.8	12433.2	6140.62	5614.94	6614.46	12214.1	6123.34	0.996381	6.6716e-29	N amino acid transport system protein [Source:BROAD_F_oxysporum;Acc:FOXG_08979]
FOXG_10868	762.649	688.759	793.444	245.304	222.374	294.958	748.284	254.212	1.56122	7.08082e-29	conserved hypothetical protein [Source:BROAD_F_oxysporum;Acc:FOXG_10868]
FOXG_02778	277.14	336.114	319.176	86.5253	69.6993	65.7746	310.81	73.9997	2.06741	8.18102e-29	hypothetical protein similar to pyridoxamine-phosphate oxidase [Source:BROAD_F_oxysporum;Acc:FOXG_02778]
FOXG_05444	166.284	174.118	174.198	16.9483	22.4033	29.8041	171.533	23.0519	2.9079	8.31977e-29	conserved hypothetical protein [Source:BROAD_F_oxysporum;Acc:FOXG_05444]
FOXG_10695	406.472	385.705	472.021	132.018	98.7407	96.6064	421.399	109.122	1.94736	8.39665e-29	predicted protein [Source:BROAD_F_oxysporum;Acc:FOXG_10695]
FOXG_08337	959.726	849.653	948.537	336.289	346.007	399.786	919.305	360.694	1.35192	8.56451e-29	conserved hypothetical protein [Source:BROAD_F_oxysporum;Acc:FOXG_08337]
FOXG_12260	597.391	621.536	592.273	2002.57	1611.38	1450.12	603.733	1688.03	-1.48375	8.78911e-29	peroxidase/catalase 2 [Source:BROAD_F_oxysporum;Acc:FOXG_12260]
FOXG_00893	6247.97	6034.63	5647.39	18833.1	17859.6	13129.2	5976.66	16607.3	-1.47445	8.97438e-29	heat shock protein SSB1 [Source:BROAD_F_oxysporum;Acc:FOXG_00893]
FOXG_10472	3110.13	3051.48	3049.03	6447.47	6427.27	5600.09	3070.21	6158.28	-1.00436	9.13777e-29	conserved hypothetical protein [Source:BROAD_F_oxysporum;Acc:FOXG_10472]
FOXG_01635	3879.96	3876.89	4050.39	2103.37	2167.32	1997.9	3935.74	2089.53	0.913031	9.37425e-29	hypothetical protein similar to ABC transporter [Source:BROAD_F_oxysporum;Acc:FOXG_01635]
FOXG_12292	36.952	49.5906	38.2112	231.924	219.055	299.069	41.5846	250.016	-2.58711	9.44968e-29	predicted protein [Source:BROAD_F_oxysporum;Acc:FOXG_12292]
FOXG_16898	221.712	215.995	196.675	16.9483	27.3819	40.0814	211.461	28.1372	2.92557	9.96252e-29	conserved hypothetical protein [Source:BROAD_F_oxysporum;Acc:FOXG_16898]
FOXG_10425	6802.25	6340.99	6302.6	1800.08	1867.78	2688.54	6481.95	2118.8	1.61385	1.02335e-28	conserved hypothetical protein [Source:BROAD_F_oxysporum;Acc:FOXG_10425]
FOXG_00856	166.284	154.282	143.854	16.9483	18.2546	7.1941	154.807	14.1323	3.4259	1.02767e-28	predicted protein [Source:BROAD_F_oxysporum;Acc:FOXG_00856]
FOXG_05258	868.372	833.123	758.605	1974.03	2010.49	2558.01	820.033	2180.84	-1.41028	1.38424e-28	conserved hypothetical protein [Source:BROAD_F_oxysporum;Acc:FOXG_05258]
FOXG_02543	145.755	154.282	171.95	9.81215	13.2761	22.61	157.329	15.2327	3.39203	1.43849e-28	conserved hypothetical protein [Source:BROAD_F_oxysporum;Acc:FOXG_02543]
FOXG_06068	2351.59	2215.05	2225.24	1067.74	1150.04	1173.67	2263.96	1130.48	1.00232	1.49397e-28	hypothetical protein similar to bax Inhibitor family protein [Source:BROAD_F_oxysporum;Acc:FOXG_06068]
FOXG_08159	3280.52	3198.04	3189.51	1582.43	1762.4	1602.23	3222.69	1649.02	0.966277	1.49979e-28	hypothetical protein similar to DnaJ domain protein [Source:BROAD_F_oxysporum;Acc:FOXG_08159]
FOXG_07995	4597.45	4559.03	4832.59	8951.36	8691.67	8207.44	4663.02	8616.82	-0.886016	1.56e-28	conserved hypothetical protein [Source:BROAD_F_oxysporum;Acc:FOXG_07995]
FOXG_03350	869.399	821	808.054	241.736	246.437	335.039	832.818	274.404	1.60576	1.92718e-28	conserved hypothetical protein [Source:BROAD_F_oxysporum;Acc:FOXG_03350]
FOXG_01913	2492.21	2613.98	2502.83	1148.02	1208.95	1330.91	2536.34	1229.29	1.04561	2.01134e-28	predicted protein [Source:BROAD_F_oxysporum;Acc:FOXG_01913]
FOXG_10417	131.385	157.588	191.056	13.3802	5.80827	1.02773	160.01	6.73874	4.53214	2.34656e-28	conserved hypothetical protein [Source:BROAD_F_oxysporum;Acc:FOXG_10417]
FOXG_07638	784.204	743.859	832.779	205.163	194.992	104.828	786.948	168.328	2.21946	2.7694e-28	conserved hypothetical protein [Source:BROAD_F_oxysporum;Acc:FOXG_07638]
FOXG_04237	3623.35	3211.27	4027.91	1050.79	1055.45	1467.6	3620.84	1191.28	1.6048	2.85494e-28	conserved hypothetical protein [Source:BROAD_F_oxysporum;Acc:FOXG_04237]
FOXG_08578	721.591	731.737	632.732	1642.2	1480.28	1545.7	695.353	1556.06	-1.1616	4.07852e-28	hypothetical protein similar to nuclear condensin complex subunit Smc2 [Source:BROAD_F_oxysporum;Acc:FOXG_08578]
novel.117	270.981	315.176	314.68	82.0652	78.8266	64.7469	300.279	75.2129	1.99171	4.1863e-28	-
FOXG_02395	100.592	84.8551	78.6701	334.505	316.136	324.762	88.0389	325.134	-1.88189	4.37332e-28	conserved hypothetical protein [Source:BROAD_F_oxysporum;Acc:FOXG_02395]
FOXG_06059	1250.21	1392.95	1238.49	3306.69	3216.95	2664.9	1293.88	3062.85	-1.24359	4.37492e-28	hypothetical protein similar to DnaJ domain protein [Source:BROAD_F_oxysporum;Acc:FOXG_06059]
novel.272	342.833	305.258	303.442	55.3048	86.2944	76.0519	317.177	72.5504	2.12745	4.62878e-28	-
FOXG_05663	414.684	383.501	441.676	58.8729	69.6993	114.078	413.287	80.8833	2.3632	4.79025e-28	hypothetical protein [Source:BROAD_F_oxysporum;Acc:FOXG_05663]
FOXG_11072	335.647	391.215	384.36	859.901	893.644	904.401	370.407	885.982	-1.25902	4.88081e-28	conserved hypothetical protein [Source:BROAD_F_oxysporum;Acc:FOXG_11072]
FOXG_03300	1916.37	1925.22	1899.32	889.338	935.962	1007.17	1913.64	944.158	1.01998	5.30219e-28	conserved hypothetical protein [Source:BROAD_F_oxysporum;Acc:FOXG_03300]
FOXG_07986	802.68	839.735	876.61	241.736	293.733	338.122	839.675	291.197	1.52996	5.49485e-28	conserved hypothetical protein [Source:BROAD_F_oxysporum;Acc:FOXG_07986]
FOXG_03017	1717.24	1602.33	1685.79	760.888	784.947	853.014	1668.45	799.616	1.06209	5.83223e-28	cytochrome c oxidase assembly protein COX15 [Source:BROAD_F_oxysporum;Acc:FOXG_03017]
FOXG_17420	284.325	272.197	334.91	74.0371	78.8266	73.9964	297.144	75.62	1.97253	6.01663e-28	conserved hypothetical protein [Source:BROAD_F_oxysporum;Acc:FOXG_17420]
FOXG_03600	600.47	489.294	296.699	2222.9	2402.14	1828.33	462.154	2151.12	-2.21782	6.62762e-28	sulfate adenylyltransferase [Source:BROAD_F_oxysporum;Acc:FOXG_03600]
FOXG_11426	225.818	221.505	219.152	41.9246	46.4662	24.6655	222.158	37.6854	2.54409	7.31149e-28	hypothetical protein [Source:BROAD_F_oxysporum;Acc:FOXG_11426]
FOXG_10323	2147.32	2061.87	2216.25	546.804	593.274	855.07	2141.81	665.049	1.68915	7.57433e-28	conserved hypothetical protein [Source:BROAD_F_oxysporum;Acc:FOXG_10323]
FOXG_05834	1757.27	1869.02	1780.19	925.91	924.345	877.68	1802.16	909.312	0.986308	8.05536e-28	conserved hypothetical protein [Source:BROAD_F_oxysporum;Acc:FOXG_05834]
FOXG_11134	60832.3	58083.8	60563.6	28745.1	29783.2	33595.4	59826.6	30707.9	0.962219	1.06988e-27	glutamate decarboxylase 1 [Source:BROAD_F_oxysporum;Acc:FOXG_11134]
FOXG_03982	966.911	973.078	1049.68	372.862	336.88	439.868	996.558	383.203	1.3815	1.47502e-27	hypothetical protein similar to zinc-containing alcohol dehydrogenase superfamily [Source:BROAD_F_oxysporum;Acc:FOXG_03982]
FOXG_08629	7550.53	7166.4	7624.26	3389.65	3839.27	3970.11	7447.06	3733.01	0.99648	2.03564e-27	hypothetical protein similar to phosphatidylethanolamine methyltransferase [Source:BROAD_F_oxysporum;Acc:FOXG_08629]
FOXG_04115	2016.96	1988.03	1707.14	4468.1	4065.79	3907.42	1904.05	4147.1	-1.12292	2.08098e-27	N(4)-(beta-N-acetylglucosaminyl)-L-asparaginase precursor [Source:BROAD_F_oxysporum;Acc:FOXG_04115]
FOXG_05101	20225.1	19525.5	20330.6	6572.36	7212.22	9346.16	20027.1	7710.24	1.37728	2.3527e-27	conserved hypothetical protein [Source:BROAD_F_oxysporum;Acc:FOXG_05101]
FOXG_12214	13211.4	12398.8	13500.9	3902.56	4338.78	5775.83	13037	4672.39	1.48066	2.45464e-27	conserved hypothetical protein [Source:BROAD_F_oxysporum;Acc:FOXG_12214]
FOXG_07761	1700.82	1688.29	1901.57	857.225	778.309	842.737	1763.56	826.09	1.09444	2.46692e-27	conserved hypothetical protein [Source:BROAD_F_oxysporum;Acc:FOXG_07761]
FOXG_10631	2618.46	2805.73	2732.1	1267.55	1413.9	1416.21	2718.76	1365.89	0.993181	2.77773e-27	hypothetical protein similar to indoleamine 2,3-dioxygenase subfamily [Source:BROAD_F_oxysporum;Acc:FOXG_10631]
FOXG_13874	598.417	571.945	614.751	214.083	248.096	211.712	595.038	224.63	1.4031	2.84439e-27	conserved hypothetical protein [Source:BROAD_F_oxysporum;Acc:FOXG_13874]
FOXG_10259	4023.66	3669.71	3942.5	1510.18	1671.12	1928.02	3878.62	1703.11	1.18802	3.06683e-27	conserved hypothetical protein [Source:BROAD_F_oxysporum;Acc:FOXG_10259]
FOXG_05718	636.396	609.414	576.539	1462.9	1341.71	1708.08	607.45	1504.23	-1.30705	3.2121e-27	conserved hypothetical protein [Source:BROAD_F_oxysporum;Acc:FOXG_05718]
FOXG_02162	1403.15	1322.42	1380.1	625.302	630.613	517.975	1368.56	591.296	1.20898	4.14663e-27	pyrroline-5-carboxylate reductase [Source:BROAD_F_oxysporum;Acc:FOXG_02162]
FOXG_09840	294.59	196.158	188.808	35.6805	33.1901	31.8596	226.519	33.5767	2.75422	4.18726e-27	hypothetical protein similar to P-glycoprotein [Source:BROAD_F_oxysporum;Acc:FOXG_09840]
FOXG_01466	4056.51	3769.99	3872.82	8541.03	8937.27	11502.3	3899.77	9660.21	-1.30848	4.26672e-27	conserved hypothetical protein [Source:BROAD_F_oxysporum;Acc:FOXG_01466]
novel.290	320.251	315.176	336.034	56.1969	92.1026	55.4973	323.82	67.9323	2.24383	4.58285e-27	-
FOXG_02993	4935.15	4791.56	5091.08	2505.67	2651.89	2777.95	4939.26	2645.17	0.901156	5.55689e-27	conserved hypothetical protein [Source:BROAD_F_oxysporum;Acc:FOXG_02993]
FOXG_04561	79.0363	104.691	57.3168	429.951	331.072	415.202	80.3481	392.075	-2.28522	5.85666e-27	conserved hypothetical protein [Source:BROAD_F_oxysporum;Acc:FOXG_04561]
FOXG_05494	1589.96	1569.27	1548.68	3343.27	3153.89	2884.83	1569.3	3127.33	-0.995029	6.51662e-27	ATP-dependent helicase NAM7 [Source:BROAD_F_oxysporum;Acc:FOXG_05494]
FOXG_02398	786.257	922.386	987.872	270.28	183.376	136.688	898.838	196.781	2.18844	7.09571e-27	hypothetical protein [Source:BROAD_F_oxysporum;Acc:FOXG_02398]
FOXG_12294	1202.99	1163.73	1236.24	581.593	584.146	529.28	1200.99	565.006	1.08669	7.5763e-27	conserved hypothetical protein [Source:BROAD_F_oxysporum;Acc:FOXG_12294]
FOXG_11065	1284.08	1260.7	1218.26	503.096	432.302	573.472	1254.35	502.956	1.32085	7.6724e-27	conserved hypothetical protein [Source:BROAD_F_oxysporum;Acc:FOXG_11065]
FOXG_05166	533.751	530.069	511.356	1158.73	1066.23	1181.89	525.059	1135.62	-1.11217	7.67374e-27	hypothetical protein similar to spermidine synthase [Source:BROAD_F_oxysporum;Acc:FOXG_05166]
FOXG_03267	740.067	771.41	669.82	1720.69	1644.57	1492.26	727.099	1619.18	-1.15524	8.23607e-27	serine/threonine-protein kinase pctaire-3 [Source:BROAD_F_oxysporum;Acc:FOXG_03267]
FOXG_03027	798.574	733.941	717.022	284.552	254.734	320.651	749.846	286.646	1.39062	8.3343e-27	conserved hypothetical protein [Source:BROAD_F_oxysporum;Acc:FOXG_03027]
FOXG_00072	3234.33	3150.66	2786.05	8037.04	7429.61	6231.11	3057.01	7232.59	-1.24243	8.50224e-27	hypothetical protein similar to eukaryotic translation initiation factor 3 subunit EifCd [Source:BROAD_F_oxysporum;Acc:FOXG_00072]
FOXG_12649	1017.21	895.937	1039.57	2315.67	2067.75	2051.34	984.238	2144.92	-1.12387	9.89362e-27	conserved hypothetical protein [Source:BROAD_F_oxysporum;Acc:FOXG_12649]
FOXG_12647	1469.87	1592.41	1447.53	2874.07	3085.02	3344.23	1503.27	3101.11	-1.04446	1.19777e-26	hypothetical protein similar to serine/threonine protein kinase [Source:BROAD_F_oxysporum;Acc:FOXG_12647]
FOXG_00255	625.105	528.967	504.613	2273.74	1987.26	1425.46	552.895	1895.49	-1.77748	1.23706e-26	HNRNP arginine N-methyltransferase [Source:BROAD_F_oxysporum;Acc:FOXG_00255]
FOXG_05911	789.336	943.324	863.123	299.717	364.262	289.819	865.261	317.933	1.44184	1.32056e-26	conserved hypothetical protein [Source:BROAD_F_oxysporum;Acc:FOXG_05911]
FOXG_05229	4300.8	4625.15	4778.65	2020.41	2001.37	1521.04	4568.2	1847.6	1.30522	1.3899e-26	multiprotein-bridging factor 1 [Source:BROAD_F_oxysporum;Acc:FOXG_05229]
FOXG_15372	133.438	127.834	170.827	11.5962	18.2546	12.3327	144.033	14.0612	3.34373	1.52995e-26	hypothetical protein similar to short chain dehydrogenase/reductase family protein [Source:BROAD_F_oxysporum;Acc:FOXG_15372]
FOXG_16605	153.967	186.24	219.152	30.3285	24.0629	14.3882	186.453	22.9265	3.00842	1.95352e-26	hypothetical protein similar to alanyl-tRNA synthetase [Source:BROAD_F_oxysporum;Acc:FOXG_16605]
FOXG_13645	212.474	185.138	187.684	33.0045	43.1472	34.9427	195.099	37.0315	2.39296	2.04242e-26	conserved hypothetical protein [Source:BROAD_F_oxysporum;Acc:FOXG_13645]
FOXG_06050	225.818	221.505	220.276	40.1406	53.1042	54.4696	222.533	49.2381	2.17855	2.16224e-26	conserved hypothetical protein [Source:BROAD_F_oxysporum;Acc:FOXG_06050]
FOXG_12705	19.5025	26.4483	22.4772	158.778	165.951	231.239	22.8093	185.323	-3.02244	2.31903e-26	glutathione-dependent formaldehyde-activating enzyme [Source:BROAD_F_oxysporum;Acc:FOXG_12705]
FOXG_01933	1961.54	1916.4	2011.71	3786.6	3468.37	3807.73	1963.22	3687.57	-0.909271	2.43289e-26	hypothetical protein similar to alpha-1,6-mannosyltransferase subunit Mnn10 [Source:BROAD_F_oxysporum;Acc:FOXG_01933]
FOXG_08785	520.408	523.457	494.498	1280.93	1095.27	1121.25	512.787	1165.82	-1.18479	2.5615e-26	helicase SWR1 [Source:BROAD_F_oxysporum;Acc:FOXG_08785]
FOXG_07836	2826.83	2882.87	3328.87	1420.98	1296.07	1472.73	3012.86	1396.6	1.10958	2.72065e-26	conserved hypothetical protein [Source:BROAD_F_oxysporum;Acc:FOXG_07836]
FOXG_08379	3388.29	3355.63	3443.5	5965.79	5790.85	5792.27	3395.81	5849.64	-0.784623	3.02675e-26	FK506-binding protein 1 [Source:BROAD_F_oxysporum;Acc:FOXG_08379]
FOXG_06251	2494.26	2768.26	2582.63	1369.24	1393.16	1340.16	2615.05	1367.52	0.934933	3.12548e-26	carbamoyl-phosphate synthase, mitochondrial precursor [Source:BROAD_F_oxysporum;Acc:FOXG_06251]
FOXG_13952	90586.8	87325.8	99980.7	49777.9	47963.9	51186	92631.1	49642.6	0.899926	3.2102e-26	Histone H3 [Source:UniProtKB/TrEMBL;Acc:Q9UVT7]
FOXG_04861	3574.08	3923.17	4298.76	1880.36	1876.9	1635.12	3932	1797.46	1.12869	3.38879e-26	conserved hypothetical protein [Source:BROAD_F_oxysporum;Acc:FOXG_04861]
FOXG_03077	1155.78	1251.89	1132.85	2295.15	2232.04	2398.72	1180.17	2308.63	-0.967824	3.55266e-26	conserved hypothetical protein [Source:BROAD_F_oxysporum;Acc:FOXG_03077]
FOXG_01702	1449.34	1712.53	1537.44	3524.35	3410.29	3078.05	1566.44	3337.56	-1.09174	3.76718e-26	translation initiation factor RLI1 [Source:BROAD_F_oxysporum;Acc:FOXG_01702]
FOXG_09241	1842.47	1809.51	2066.78	895.582	933.473	951.676	1906.25	926.91	1.0403	4.07841e-26	conserved hypothetical protein [Source:BROAD_F_oxysporum;Acc:FOXG_09241]
FOXG_17180	243.267	230.321	267.478	66.009	56.4232	61.6637	247.022	61.3653	2.01035	4.34529e-26	peroxidase/catalase 2 [Source:BROAD_F_oxysporum;Acc:FOXG_17180]
FOXG_08206	2293.08	2273.45	2566.89	1115.91	1172.44	983.536	2377.81	1090.63	1.12341	4.53023e-26	conserved hypothetical protein [Source:BROAD_F_oxysporum;Acc:FOXG_08206]
FOXG_11448	1306.66	1174.75	1028.33	3182.7	2784.65	2599.12	1169.91	2855.49	-1.28708	4.68809e-26	conserved hypothetical protein [Source:BROAD_F_oxysporum;Acc:FOXG_11448]
FOXG_09723	3194.3	3270.78	2997.33	5770.44	5619.09	6122.18	3154.13	5837.23	-0.887833	4.69433e-26	oligo-1,6-glucosidase [Source:BROAD_F_oxysporum;Acc:FOXG_09723]
FOXG_10430	1461.66	1400.66	1308.17	2655.52	2612.06	2784.11	1390.16	2683.9	-0.948566	5.01558e-26	MedA homolog [Source:UniProtKB/TrEMBL;Acc:Q876Z6]
FOXG_00554	1124.98	1148.3	997.986	2138.16	2394.67	2420.3	1090.42	2317.71	-1.08747	5.19689e-26	vacuolar transporter chaperone 4 [Source:BROAD_F_oxysporum;Acc:FOXG_00554]
FOXG_07769	316.145	295.34	304.566	690.418	735.162	799.572	305.35	741.717	-1.27928	5.21651e-26	conserved hypothetical protein [Source:BROAD_F_oxysporum;Acc:FOXG_07769]
FOXG_11066	674.374	696.473	737.251	187.323	219.055	279.542	702.699	228.64	1.62337	5.95606e-26	conserved hypothetical protein [Source:BROAD_F_oxysporum;Acc:FOXG_11066]
FOXG_01177	772.913	741.655	660.829	1513.75	1533.38	1673.14	725.132	1573.42	-1.11665	5.963e-26	hypothetical protein [Source:BROAD_F_oxysporum;Acc:FOXG_01177]
FOXG_08494	2326.95	2121.38	2110.61	1102.53	1137.59	1142.83	2186.31	1127.65	0.955478	7.2599e-26	hypothetical protein [Source:BROAD_F_oxysporum;Acc:FOXG_08494]
FOXG_01543	2766.27	3462.53	3613.21	8303.75	7569.84	7268.09	3280.67	7713.9	-1.23372	7.55008e-26	hypothetical protein similar to PX domain protein [Source:BROAD_F_oxysporum;Acc:FOXG_01543]
FOXG_10192	282.272	274.401	304.566	76.7132	45.6364	40.0814	287.08	54.1437	2.4017	8.32042e-26	conserved hypothetical protein [Source:BROAD_F_oxysporum;Acc:FOXG_10192]
FOXG_01529	687.718	557.619	613.627	3000.73	2475.15	1654.64	619.655	2376.84	-1.93962	8.85828e-26	conserved hypothetical protein [Source:BROAD_F_oxysporum;Acc:FOXG_01529]
FOXG_09985	945.356	1064.55	960.899	308.637	369.24	424.452	990.267	367.443	1.43209	8.8857e-26	conserved hypothetical protein [Source:BROAD_F_oxysporum;Acc:FOXG_09985]
FOXG_02291	887.875	962.058	993.491	423.706	445.578	406.98	947.808	425.421	1.15427	9.36365e-26	conserved hypothetical protein [Source:BROAD_F_oxysporum;Acc:FOXG_02291]
FOXG_15712	488.588	465.05	558.558	171.267	140.228	181.908	504.065	164.468	1.61917	9.94419e-26	hypothetical protein similar to ABC transporter [Source:BROAD_F_oxysporum;Acc:FOXG_15712]
FOXG_04121	247.373	211.587	223.648	678.822	595.763	817.044	227.536	697.21	-1.61326	1.08644e-25	conserved hypothetical protein [Source:BROAD_F_oxysporum;Acc:FOXG_04121]
FOXG_12695	451.636	418.765	420.323	900.042	945.919	964.009	430.241	936.656	-1.12162	1.12377e-25	conserved hypothetical protein [Source:BROAD_F_oxysporum;Acc:FOXG_12695]
FOXG_05321	873.505	859.571	794.568	2185.43	2070.23	1711.17	842.548	1988.95	-1.23949	1.23194e-25	ATP-dependent RNA helicase DBP5 [Source:BROAD_F_oxysporum;Acc:FOXG_05321]
FOXG_12889	601.497	573.047	648.466	204.271	233.99	250.766	607.67	229.676	1.40517	1.24605e-25	conserved hypothetical protein [Source:BROAD_F_oxysporum;Acc:FOXG_12889]
FOXG_08257	1048	992.915	830.532	2523.51	2113.38	2242.5	957.149	2293.13	-1.26	1.27855e-25	Topoisomerase II [Source:UniProtKB/TrEMBL;Acc:A9YG31]
FOXG_05492	1624.86	1682.78	1625.1	563.753	688.695	764.63	1644.25	672.359	1.29117	1.33294e-25	conserved hypothetical protein [Source:BROAD_F_oxysporum;Acc:FOXG_05492]
FOXG_12918	200.157	219.301	240.506	28.5444	51.4447	32.8873	219.988	37.6255	2.53721	1.36614e-25	conserved hypothetical protein [Source:BROAD_F_oxysporum;Acc:FOXG_12918]
FOXG_11757	152.94	141.058	118.005	7.13611	9.12729	18.4991	137.334	11.5875	3.59958	1.47699e-25	hypothetical protein similar to glycosyl hydrolase family protein [Source:BROAD_F_oxysporum;Acc:FOXG_11757]
FOXG_10278	247.373	303.054	209.038	697.555	748.438	795.461	253.155	747.151	-1.56078	1.71302e-25	conserved hypothetical protein [Source:BROAD_F_oxysporum;Acc:FOXG_10278]
FOXG_03462	98714.2	96787.7	106023	34172.1	37953.8	48394.7	100508	40173.5	1.32303	1.87e-25	conserved hypothetical protein [Source:BROAD_F_oxysporum;Acc:FOXG_03462]
FOXG_01361	238.135	186.24	240.506	25.8684	43.9769	44.1923	221.627	38.0125	2.54643	1.95449e-25	conserved hypothetical protein [Source:BROAD_F_oxysporum;Acc:FOXG_01361]
FOXG_05342	1809.62	1738.98	1816.16	815.3	882.028	947.565	1788.25	881.631	1.02109	2.04481e-25	conserved hypothetical protein [Source:BROAD_F_oxysporum;Acc:FOXG_05342]
FOXG_10435	1129.09	1171.44	1291.31	2376.32	2407.11	2283.61	1197.28	2355.68	-0.976935	2.15461e-25	conserved hypothetical protein [Source:BROAD_F_oxysporum;Acc:FOXG_10435]
FOXG_09114	4048.3	4024.55	4176.26	2090.88	2087.66	2340.14	4083.04	2172.89	0.91051	2.19365e-25	amino-acid permease inda1 [Source:BROAD_F_oxysporum;Acc:FOXG_09114]
FOXG_03823	1186.57	1103.12	1112.62	3005.19	2519.96	2331.91	1134.1	2619.02	-1.20756	2.37103e-25	conserved hypothetical protein [Source:BROAD_F_oxysporum;Acc:FOXG_03823]
FOXG_09238	147.808	170.812	124.748	607.461	563.403	1001.01	147.79	723.957	-2.2907	2.37372e-25	hypothetical protein [Source:BROAD_F_oxysporum;Acc:FOXG_09238]
FOXG_02495	90.3272	85.9571	48.3259	393.378	325.263	342.233	74.8701	353.625	-2.23591	2.57e-25	predicted protein [Source:BROAD_F_oxysporum;Acc:FOXG_02495]
FOXG_01793	6190.49	6190.01	6445.33	3364.68	3670.83	3565.19	6275.28	3533.56	0.828492	2.72285e-25	conserved hypothetical protein [Source:BROAD_F_oxysporum;Acc:FOXG_01793]
FOXG_01291	1981.04	1954.97	1991.48	1086.47	1082	1055.48	1975.83	1074.65	0.878356	2.72331e-25	hypothetical protein similar to homoserine O-acetyltransferase [Source:BROAD_F_oxysporum;Acc:FOXG_01291]
FOXG_08697	195.025	214.893	197.799	18.7323	28.2116	44.1923	202.572	30.3787	2.75336	2.80085e-25	peroxisomal catalase [Source:BROAD_F_oxysporum;Acc:FOXG_08697]
FOXG_07881	663.083	607.21	654.086	1328.21	1265.37	1299.05	641.46	1297.54	-1.01604	3.18169e-25	hypothetical protein similar to cpc-3 protein [Source:BROAD_F_oxysporum;Acc:FOXG_07881]
FOXG_10530	7501.26	7357.05	7255.63	2648.39	2816.18	3648.43	7371.31	3037.67	1.27942	3.24458e-25	C-5 sterol desaturase [Source:BROAD_F_oxysporum;Acc:FOXG_10530]
FOXG_02064	1937.93	1885.55	1668.93	4193.36	4252.49	3549.77	1830.8	3998.54	-1.12708	3.31958e-25	T-complex protein 1 subunit theta [Source:BROAD_F_oxysporum;Acc:FOXG_02064]
FOXG_00407	4803.76	5363.5	6001.4	2313.88	1941.62	1584.76	5389.56	1946.75	1.46861	3.93556e-25	hypothetical protein similar to annexin XIV [Source:BROAD_F_oxysporum;Acc:FOXG_00407]
FOXG_03580	447.53	470.56	434.933	174.835	165.121	172.658	451.008	170.871	1.40094	4.06811e-25	conserved hypothetical protein [Source:BROAD_F_oxysporum;Acc:FOXG_03580]
FOXG_11742	247.373	223.709	278.717	60.6569	57.253	67.83	249.933	61.9133	2.01709	4.18877e-25	conserved hypothetical protein [Source:BROAD_F_oxysporum;Acc:FOXG_11742]
FOXG_02423	508.09	452.928	509.108	147.182	146.037	192.185	490.042	161.801	1.60368	4.23544e-25	conserved hypothetical protein [Source:BROAD_F_oxysporum;Acc:FOXG_02423]
FOXG_11516	511.17	483.784	418.075	1579.76	1579.02	1114.06	471.01	1424.28	-1.59665	4.51473e-25	conserved hypothetical protein [Source:BROAD_F_oxysporum;Acc:FOXG_11516]
FOXG_05537	7303.16	6958.12	7489.39	3743.78	3918.93	4192.1	7250.22	3951.6	0.875789	4.52939e-25	hypothetical protein similar to RING-15 protein [Source:BROAD_F_oxysporum;Acc:FOXG_05537]
FOXG_09537	124.2	114.609	143.854	3.56805	0	6.16637	127.554	3.24481	5.38231	5.65912e-25	protein indc11 [Source:BROAD_F_oxysporum;Acc:FOXG_09537]
FOXG_11214	1329.25	1165.93	1094.64	2731.35	2622.02	3308.26	1196.61	2887.21	-1.26996	5.95921e-25	hypothetical protein similar to ras GTPase activating protein [Source:BROAD_F_oxysporum;Acc:FOXG_11214]
FOXG_10000	49.2694	44.0806	40.4589	221.219	190.843	252.821	44.6029	221.628	-2.30828	6.0162e-25	hypothetical protein similar to glycerol kinase [Source:BROAD_F_oxysporum;Acc:FOXG_10000]
FOXG_10871	119.068	132.242	169.703	14.2722	16.5951	17.4714	140.337	16.1129	3.12418	9.30692e-25	hypothetical protein similar to D-aminopeptidase [Source:BROAD_F_oxysporum;Acc:FOXG_10871]
FOXG_11984	2497.34	2667.98	2502.83	1131.07	1247.95	1361.74	2556.05	1246.92	1.03615	1.00922e-24	hypothetical protein similar to MSF membrane transporter [Source:BROAD_F_oxysporum;Acc:FOXG_11984]
novel.137	119.068	106.895	124.748	10.7042	3.31901	9.24955	116.904	7.75758	3.93838	1.11461e-24	-
FOXG_05119	372.6	408.847	421.447	145.398	124.463	104.828	400.965	124.896	1.67858	1.21657e-24	conserved hypothetical protein [Source:BROAD_F_oxysporum;Acc:FOXG_05119]
FOXG_00094	2464.49	2363.82	2121.85	4319.13	4553.69	4802.57	2316.72	4558.46	-0.976136	1.24612e-24	G2/mitotic-specific cyclin-B [Source:BROAD_F_oxysporum;Acc:FOXG_00094]
FOXG_00971	553.254	493.702	520.347	1115.02	1103.57	1273.35	522.434	1163.98	-1.15455	1.35709e-24	conserved hypothetical protein [Source:BROAD_F_oxysporum;Acc:FOXG_00971]
FOXG_08297	775.992	768.104	724.889	326.477	336.88	356.622	756.328	339.993	1.15474	1.46985e-24	conserved hypothetical protein [Source:BROAD_F_oxysporum;Acc:FOXG_08297]
FOXG_12800	500.905	485.988	492.25	1044.55	979.109	1022.59	493.048	1015.42	-1.0419	1.47652e-24	conserved hypothetical protein [Source:BROAD_F_oxysporum;Acc:FOXG_12800]
FOXG_15630	962.805	1114.14	1017.09	488.823	449.726	470.699	1031.34	469.75	1.13463	1.50227e-24	pre-mRNA-splicing factor slt-11 [Source:BROAD_F_oxysporum;Acc:FOXG_15630]
FOXG_01893	3392.4	3471.34	3323.25	5700.86	5981.69	5779.94	3395.66	5820.83	-0.777572	1.58474e-24	eukaryotic peptide chain release factor subunit 1 [Source:BROAD_F_oxysporum;Acc:FOXG_01893]
FOXG_12238	257.638	297.544	287.708	75.8212	71.3588	45.22	280.963	64.1333	2.12138	1.63188e-24	conserved hypothetical protein [Source:BROAD_F_oxysporum;Acc:FOXG_12238]
FOXG_04941	907.377	830.919	958.651	322.909	275.478	386.426	898.982	328.271	1.4566	1.65014e-24	conserved hypothetical protein [Source:BROAD_F_oxysporum;Acc:FOXG_04941]
FOXG_00403	704.141	797.858	831.655	1634.17	1557.45	1671.09	777.885	1620.9	-1.05956	1.70262e-24	conserved hypothetical protein [Source:BROAD_F_oxysporum;Acc:FOXG_00403]
FOXG_07102	65.6925	52.8967	50.5736	217.651	247.267	272.348	56.3876	245.755	-2.11932	1.7127e-24	conserved hypothetical protein [Source:BROAD_F_oxysporum;Acc:FOXG_07102]
FOXG_08615	1399.04	1336.74	1476.75	2692.99	2581.36	2894.08	1404.18	2722.81	-0.955102	1.7519e-24	survival factor 1 [Source:BROAD_F_oxysporum;Acc:FOXG_08615]
FOXG_02175	345.912	387.909	306.813	838.493	847.178	804.711	346.878	830.127	-1.25896	1.76781e-24	GTP-binding protein 128up [Source:BROAD_F_oxysporum;Acc:FOXG_02175]
FOXG_15430	443.424	510.232	359.635	1206	1273.67	1081.17	437.764	1186.95	-1.43918	1.94601e-24	mitochondrial peroxiredoxin PRX1 [Source:BROAD_F_oxysporum;Acc:FOXG_15430]
FOXG_05425	886.848	877.203	894.591	311.313	326.093	413.147	886.214	350.184	1.34249	2.12163e-24	hypothetical protein similar to Fox2 protein [Source:BROAD_F_oxysporum;Acc:FOXG_05425]
FOXG_08523	31130	32390.4	30467.8	17388.9	14370.5	14149.8	31329.4	15303.1	1.03367	2.31399e-24	acyl-CoA desaturase [Source:BROAD_F_oxysporum;Acc:FOXG_08523]
FOXG_07706	826.288	819.898	881.105	389.81	402.43	362.788	842.431	385.009	1.1281	2.51304e-24	4-hydroxyphenylpyruvate dioxygenase [Source:BROAD_F_oxysporum;Acc:FOXG_07706]
FOXG_00567	11595.7	11406.9	10913.8	3851.71	4685.62	5494.23	11305.5	4677.19	1.27353	2.97897e-24	conserved hypothetical protein [Source:BROAD_F_oxysporum;Acc:FOXG_00567]
FOXG_10702	270.981	246.851	247.249	67.793	54.7637	76.0519	255.027	66.2029	1.95329	3.02616e-24	predicted protein [Source:BROAD_F_oxysporum;Acc:FOXG_10702]
FOXG_07693	2125.77	2233.78	2560.15	1033.84	984.088	1146.94	2306.57	1054.96	1.12916	3.38186e-24	conserved hypothetical protein [Source:BROAD_F_oxysporum;Acc:FOXG_07693]
FOXG_13626	478.323	492.6	472.021	97.2295	111.187	169.575	480.981	125.997	1.9397	3.41285e-24	conserved hypothetical protein [Source:BROAD_F_oxysporum;Acc:FOXG_13626]
FOXG_01191	324.357	374.685	336.034	904.502	848.008	755.38	345.025	835.963	-1.27795	3.85978e-24	hypothetical protein similar to Npt1p [Source:BROAD_F_oxysporum;Acc:FOXG_01191]
FOXG_01608	656.925	646.882	643.971	1325.53	1419.71	1241.5	649.259	1328.91	-1.03396	3.88704e-24	hypothetical protein similar to GTP-binding protein [Source:BROAD_F_oxysporum;Acc:FOXG_01608]
FOXG_03129	541.963	471.662	468.649	1090.93	1114.36	1314.46	494.091	1173.25	-1.24618	4.75471e-24	conserved hypothetical protein [Source:BROAD_F_oxysporum;Acc:FOXG_03129]
FOXG_13885	1581.75	1565.96	1422.8	781.404	768.352	781.073	1523.51	776.943	0.971854	5.30294e-24	conserved hypothetical protein [Source:BROAD_F_oxysporum;Acc:FOXG_13885]
FOXG_00896	806.786	778.022	996.863	304.177	352.645	329.901	860.557	328.908	1.3868	5.44201e-24	predicted protein [Source:BROAD_F_oxysporum;Acc:FOXG_00896]
FOXG_06358	945.356	1031.49	992.367	2039.14	2003.02	2452.16	989.736	2164.78	-1.1287	5.63235e-24	conserved hypothetical protein [Source:BROAD_F_oxysporum;Acc:FOXG_06358]
FOXG_01922	1269.71	1087.69	1227.25	503.988	521.085	582.722	1194.88	535.932	1.15815	6.10395e-24	conserved hypothetical protein [Source:BROAD_F_oxysporum;Acc:FOXG_01922]
FOXG_03381	3929.23	4023.45	4140.3	2376.32	2300.08	2222.98	4030.99	2299.79	0.809367	6.97276e-24	hypothetical protein similar to brain protein 44 [Source:BROAD_F_oxysporum;Acc:FOXG_03381]
FOXG_16510	953.567	912.468	988.996	415.678	456.364	465.561	951.677	445.868	1.09434	6.99123e-24	conserved hypothetical protein [Source:BROAD_F_oxysporum;Acc:FOXG_16510]
FOXG_01307	386.97	397.827	401.218	132.91	141.888	156.215	395.338	143.671	1.46256	7.30952e-24	hypothetical protein similar to glutathione-S-transferase [Source:BROAD_F_oxysporum;Acc:FOXG_01307]
FOXG_01759	1235.84	1210.01	1103.63	2606.46	2404.63	2227.09	1183.16	2412.73	-1.02805	7.42149e-24	hypothetical protein similar to splicing factor u2af large subunit [Source:BROAD_F_oxysporum;Acc:FOXG_01759]
FOXG_07525	763.675	722.921	695.668	291.688	315.306	339.15	727.422	315.382	1.20739	7.46792e-24	hypothetical protein similar to siderochrome-iron transporter [Source:BROAD_F_oxysporum;Acc:FOXG_07525]
FOXG_15236	189.892	182.934	204.542	7.13611	14.9356	32.8873	192.456	18.3197	3.42238	7.62257e-24	hypothetical protein similar to mfs-multidrug-resistance transporter [Source:BROAD_F_oxysporum;Acc:FOXG_15236]
FOXG_05896	242.241	235.831	213.533	49.0607	62.2315	62.6914	230.535	57.9946	1.99289	8.63262e-24	conserved hypothetical protein [Source:BROAD_F_oxysporum;Acc:FOXG_05896]
novel.488	897.113	886.019	936.174	403.19	444.748	438.84	906.435	428.926	1.07946	9.04254e-24	-
FOXG_05975	4216.64	4078.55	4370.69	2167.59	2251.12	2445.99	4221.96	2288.24	0.884043	9.37695e-24	conserved hypothetical protein [Source:BROAD_F_oxysporum;Acc:FOXG_05975]
FOXG_03074	38090.3	38243.2	40437.6	20015.9	20226.1	23010.8	38923.7	21084.3	0.884537	9.64105e-24	transaldolase [Source:BROAD_F_oxysporum;Acc:FOXG_03074]
FOXG_00077	519.381	551.007	520.347	1267.55	1194.02	1051.37	530.245	1170.98	-1.14379	9.84435e-24	conserved hypothetical protein [Source:BROAD_F_oxysporum;Acc:FOXG_00077]
FOXG_02784	410.578	454.03	398.97	103.474	107.868	155.187	421.193	122.176	1.79221	9.89257e-24	hypothetical protein similar to high affinity methionine permease [Source:BROAD_F_oxysporum;Acc:FOXG_02784]
FOXG_05519	37176.8	36568.1	41029.8	15230.2	15945.4	19929.7	38258.3	17035.1	1.16733	9.96766e-24	hypothetical protein [Source:BROAD_F_oxysporum;Acc:FOXG_05519]
FOXG_13051	356.176	343.828	301.194	806.38	757.565	917.761	333.733	827.235	-1.30778	1.02475e-23	Endopolygalacturonase [Source:UniProtKB/TrEMBL;Acc:Q14TQ5]
FOXG_10431	462.927	480.478	356.263	1212.25	1038.85	1109.95	433.223	1120.35	-1.36995	1.04326e-23	DNA replication licensing factor mcm6 [Source:BROAD_F_oxysporum;Acc:FOXG_10431]
FOXG_11147	365.414	301.952	261.859	87.4173	79.6563	64.7469	309.742	77.2735	1.9997	1.08059e-23	xanthine dehydrogenase [Source:BROAD_F_oxysporum;Acc:FOXG_11147]
FOXG_02183	2978.74	3146.25	2968.11	6360.95	5768.45	5362.68	3031.03	5830.69	-0.944011	1.29025e-23	serine/threonine-protein phosphatase PP1 [Source:BROAD_F_oxysporum;Acc:FOXG_02183]
FOXG_13927	4874.59	4970.08	4812.36	2887.45	2623.68	2546.71	4885.68	2685.95	0.862948	1.2927e-23	1,4-alpha-glucan branching enzyme [Source:BROAD_F_oxysporum;Acc:FOXG_13927]
FOXG_07109	114.962	130.038	123.624	3.56805	3.31901	0	122.875	2.29569	5.66943	1.30572e-23	hypothetical protein similar to small heat shock protein [Source:BROAD_F_oxysporum;Acc:FOXG_07109]
FOXG_17535	672.321	725.125	747.366	272.064	291.243	330.928	714.938	298.079	1.26389	1.4068e-23	conserved hypothetical protein [Source:BROAD_F_oxysporum;Acc:FOXG_17535]
FOXG_00471	312.039	293.136	321.424	103.474	103.719	96.6064	308.866	101.266	1.60713	1.42726e-23	conserved hypothetical protein [Source:BROAD_F_oxysporum;Acc:FOXG_00471]
FOXG_09876	5007	5081.39	5331.59	2283.55	2395.5	2834.47	5139.99	2504.51	1.03771	1.65568e-23	conserved hypothetical protein [Source:BROAD_F_oxysporum;Acc:FOXG_09876]
FOXG_08110	3713.68	3857.05	4129.06	2088.2	1822.97	1673.14	3899.93	1861.44	1.06657	2.22248e-23	conserved hypothetical protein [Source:BROAD_F_oxysporum;Acc:FOXG_08110]
FOXG_01126	509.117	586.271	537.204	200.703	151.015	120.244	544.198	157.321	1.78674	2.25029e-23	hypothetical protein similar to class II aldolase/adducin domain protein [Source:BROAD_F_oxysporum;Acc:FOXG_01126]
FOXG_12143	147.808	112.405	97.7757	9.81215	11.6165	9.24955	119.33	10.2261	3.53878	2.58767e-23	phytoene dehydrogenase [Source:BROAD_F_oxysporum;Acc:FOXG_12143]
novel.359	27.714	30.8564	19.1056	151.642	154.334	182.936	25.892	162.971	-2.64936	3.30849e-23	-
FOXG_03656	8977.29	8334.53	9239.24	4105.05	4307.25	4957.76	8850.35	4456.69	0.990023	3.65022e-23	conserved hypothetical protein [Source:BROAD_F_oxysporum;Acc:FOXG_03656]
FOXG_07944	2500.42	2465.21	2389.32	767.132	913.559	1151.06	2451.65	943.915	1.37819	3.73236e-23	conserved hypothetical protein [Source:BROAD_F_oxysporum;Acc:FOXG_07944]
FOXG_03079	732.882	638.066	674.315	1452.2	1335.07	1549.81	681.754	1445.7	-1.08339	3.85614e-23	hypothetical protein similar to myosin type II heavy chain [Source:BROAD_F_oxysporum;Acc:FOXG_03079]
FOXG_02318	784.204	772.512	717.022	1790.27	1715.1	1455.26	757.912	1653.54	-1.12582	3.91915e-23	conserved hypothetical protein [Source:BROAD_F_oxysporum;Acc:FOXG_02318]
FOXG_06167	3378.03	3376.57	3594.1	1404.92	1559.94	1827.3	3449.57	1597.39	1.11135	4.26675e-23	hypothetical protein similar to nicotinamide mononucleotide adenylyl transferase [Source:BROAD_F_oxysporum;Acc:FOXG_06167]
FOXG_03424	1822.97	1684.98	1527.32	738.587	817.307	829.376	1678.42	795.09	1.07848	4.5351e-23	hypothetical protein similar to phytochrome-1 [Source:BROAD_F_oxysporum;Acc:FOXG_03424]
FOXG_11617	179.628	165.302	152.845	639.574	568.381	432.673	165.925	546.876	-1.72111	5.27913e-23	XPA-binding protein 1 [Source:BROAD_F_oxysporum;Acc:FOXG_11617]
FOXG_03041	3139.9	3551.79	3439.01	1768.86	1828.78	1592.98	3376.9	1730.21	0.964068	6.36077e-23	hypothetical protein similar to signal sequence receptor subunit alpha [Source:BROAD_F_oxysporum;Acc:FOXG_03041]
FOXG_00832	1760.35	2000.16	2049.92	6282.45	5355.23	4111.94	1936.81	5249.87	-1.43892	6.73273e-23	UDP-N-acetylglucosamine pyrophosphorylase [Source:BROAD_F_oxysporum;Acc:FOXG_00832]
FOXG_01946	3012.62	3378.77	3219.85	9678.35	8227.01	6515.79	3203.75	8140.38	-1.34551	7.10464e-23	calcium/calmodulin-dependent protein kinase [Source:BROAD_F_oxysporum;Acc:FOXG_01946]
FOXG_03015	516.302	481.58	440.553	1024.03	1000.68	995.868	479.478	1006.86	-1.06956	7.16745e-23	vacuolar calcium ion transporter [Source:BROAD_F_oxysporum;Acc:FOXG_03015]
FOXG_01409	151.914	149.874	150.597	380.89	424.834	473.783	150.795	426.502	-1.49867	9.16919e-23	conserved hypothetical protein [Source:BROAD_F_oxysporum;Acc:FOXG_01409]
FOXG_03342	1696.71	1712.53	1575.65	789.432	833.072	658.774	1661.63	760.426	1.12626	1.03431e-22	protein arg-6, mitochondrial precursor [Source:BROAD_F_oxysporum;Acc:FOXG_03342]
FOXG_07679	623.052	587.373	505.736	1414.73	1394.82	1924.93	572.054	1578.16	-1.46282	1.07992e-22	conserved hypothetical protein [Source:BROAD_F_oxysporum;Acc:FOXG_07679]
FOXG_05916	175.522	176.322	167.455	417.462	464.662	452.2	173.1	444.775	-1.36122	1.14576e-22	conserved hypothetical protein [Source:BROAD_F_oxysporum;Acc:FOXG_05916]
FOXG_08282	1832.2	1880.04	1810.54	3155.94	3168	3105.79	1840.93	3143.25	-0.771898	1.32045e-22	Ras protein [Source:UniProtKB/TrEMBL;Acc:Q874F1]
FOXG_01448	209.395	210.485	193.304	544.128	543.489	469.672	204.394	519.096	-1.34541	1.32703e-22	conserved hypothetical protein [Source:BROAD_F_oxysporum;Acc:FOXG_01448]
FOXG_05720	3550.47	4046.6	3482.84	1567.27	1515.13	1063.7	3693.3	1382.03	1.41726	1.35989e-22	5-oxoprolinase [Source:BROAD_F_oxysporum;Acc:FOXG_05720]
FOXG_07963	3201.48	3116.5	3332.24	1865.2	1777.33	1665.95	3216.74	1769.49	0.861843	1.50395e-22	hypothetical protein similar to phosphoserine aminotransferase [Source:BROAD_F_oxysporum;Acc:FOXG_07963]
FOXG_02081	463.953	455.132	556.31	1043.66	1100.25	1169.55	491.798	1104.49	-1.1675	1.62224e-22	conserved hypothetical protein [Source:BROAD_F_oxysporum;Acc:FOXG_02081]
FOXG_13896	3036.22	2887.28	3056.9	1669.85	1709.29	1760.5	2993.47	1713.21	0.805349	1.68284e-22	conserved hypothetical protein [Source:BROAD_F_oxysporum;Acc:FOXG_13896]
FOXG_11313	372.6	336.114	341.653	742.155	745.119	774.907	350.122	754.06	-1.10575	1.91601e-22	conserved hypothetical protein [Source:BROAD_F_oxysporum;Acc:FOXG_11313]
FOXG_03633	322.304	277.708	365.254	79.3892	92.9324	104.828	321.755	92.3833	1.80329	1.93851e-22	conserved hypothetical protein [Source:BROAD_F_oxysporum;Acc:FOXG_03633]
FOXG_01155	205.289	192.852	222.524	51.7368	48.1257	29.8041	206.888	43.2222	2.24748	1.94098e-22	conserved hypothetical protein [Source:BROAD_F_oxysporum;Acc:FOXG_01155]
FOXG_12789	1343.62	1293.76	1360.99	703.799	712.758	643.358	1332.79	686.638	0.955785	2.02884e-22	hypothetical protein similar to heavy metal ion transporter [Source:BROAD_F_oxysporum;Acc:FOXG_12789]
FOXG_08750	48.2429	65.0188	41.5828	241.736	253.075	412.119	51.6148	302.31	-2.54797	2.22463e-22	predicted protein [Source:BROAD_F_oxysporum;Acc:FOXG_08750]
FOXG_04701	727.749	807.776	645.095	1610.08	1476.96	1568.31	726.874	1551.79	-1.09382	2.36285e-22	predicted protein [Source:BROAD_F_oxysporum;Acc:FOXG_04701]
FOXG_05014	529.646	586.271	632.732	226.571	180.886	236.377	582.883	214.612	1.44407	2.41636e-22	hypothetical protein [Source:BROAD_F_oxysporum;Acc:FOXG_05014]
FOXG_02945	264.823	326.196	258.487	1350.51	929.324	795.461	283.169	1025.1	-1.85667	2.58101e-22	hypothetical protein [Source:BROAD_F_oxysporum;Acc:FOXG_02945]
FOXG_02174	202.21	160.894	215.781	509.34	511.128	582.722	192.962	534.397	-1.46852	2.72557e-22	conserved hypothetical protein [Source:BROAD_F_oxysporum;Acc:FOXG_02174]
FOXG_04446	626.131	534.477	687.801	162.346	204.119	237.405	616.137	201.29	1.61649	2.79357e-22	hypothetical protein [Source:BROAD_F_oxysporum;Acc:FOXG_04446]
FOXG_08980	2769.35	2600.75	2918.66	1342.48	991.555	941.399	2762.92	1091.81	1.33905	2.93871e-22	conserved hypothetical protein [Source:BROAD_F_oxysporum;Acc:FOXG_08980]
FOXG_00743	604.576	557.619	581.035	1148.91	1101.08	1177.78	581.077	1142.59	-0.974781	3.15593e-22	conserved hypothetical protein [Source:BROAD_F_oxysporum;Acc:FOXG_00743]
FOXG_05020	417.763	478.274	379.864	1017.79	919.367	961.953	425.3	966.369	-1.18388	3.35211e-22	hypothetical protein similar to cell division control protein 15 [Source:BROAD_F_oxysporum;Acc:FOXG_05020]
FOXG_01052	1193.76	1102.01	1124.98	2562.75	2332.44	2093.48	1140.25	2329.56	-1.03087	3.58625e-22	adenine phosphoribosyltransferase [Source:BROAD_F_oxysporum;Acc:FOXG_01052]
FOXG_10623	300.748	299.748	266.354	720.747	666.292	628.969	288.95	672.003	-1.21758	3.69103e-22	conserved hypothetical protein [Source:BROAD_F_oxysporum;Acc:FOXG_10623]
FOXG_12736	1441.13	1442.54	1673.43	701.123	725.205	779.018	1519.03	735.115	1.04754	3.72603e-22	glutaryl-CoA dehydrogenase, mitochondrial precursor [Source:BROAD_F_oxysporum;Acc:FOXG_12736]
FOXG_04802	47875.4	40104.5	37439.1	88255.8	82041.9	94944.6	41806.3	88414.1	-1.08053	3.87536e-22	hypothetical protein [Source:BROAD_F_oxysporum;Acc:FOXG_04802]
FOXG_01556	6647.26	6821.47	6830.81	4105.05	4138.81	4218.82	6766.51	4154.23	0.703874	4.15414e-22	hypothetical protein [Source:BROAD_F_oxysporum;Acc:FOXG_01556]
FOXG_15235	205.289	240.239	197.799	32.1125	41.4877	58.5805	214.442	44.0602	2.29355	4.54497e-22	conserved hypothetical protein [Source:BROAD_F_oxysporum;Acc:FOXG_15235]
FOXG_07088	14.3702	16.5302	20.2295	122.206	122.804	156.215	17.0433	133.741	-2.97438	4.84599e-22	conserved hypothetical protein [Source:BROAD_F_oxysporum;Acc:FOXG_07088]
FOXG_04333	5520.22	5593.82	5857.55	3464.58	3281.67	3294.9	5657.2	3347.05	0.757119	4.8571e-22	hypothetical protein [Source:BROAD_F_oxysporum;Acc:FOXG_04333]
FOXG_09193	2115.5	2121.38	2275.81	891.122	952.557	1152.08	2170.9	998.587	1.12141	4.8853e-22	predicted protein [Source:BROAD_F_oxysporum;Acc:FOXG_09193]
FOXG_02033	946.382	913.57	967.642	1767.97	1859.48	1675.2	942.531	1767.55	-0.90762	4.97713e-22	hypothetical protein similar to translation initiation factor eIF4E3 [Source:BROAD_F_oxysporum;Acc:FOXG_02033]
FOXG_07715	4020.58	4055.41	3790.78	7335.92	6996.48	6561.01	3955.59	6964.47	-0.816181	5.12568e-22	leucyl-tRNA synthetase [Source:BROAD_F_oxysporum;Acc:FOXG_07715]
FOXG_03513	682.586	606.108	655.21	256.9	303.69	260.015	647.968	273.535	1.24259	7.0157e-22	conserved hypothetical protein [Source:BROAD_F_oxysporum;Acc:FOXG_03513]
FOXG_15716	535.804	528.967	494.498	143.614	137.739	211.712	519.756	164.355	1.66728	7.17706e-22	conserved hypothetical protein [Source:BROAD_F_oxysporum;Acc:FOXG_15716]
FOXG_06317	1527.35	1687.18	1495.86	613.705	728.524	784.156	1570.13	708.795	1.14821	7.19258e-22	conserved hypothetical protein [Source:BROAD_F_oxysporum;Acc:FOXG_06317]
FOXG_08841	317.171	317.38	218.029	781.404	939.281	1173.67	284.193	964.783	-1.76174	7.27988e-22	predicted protein [Source:BROAD_F_oxysporum;Acc:FOXG_08841]
FOXG_07652	755.463	778.022	815.921	366.618	388.325	375.121	783.136	376.688	1.05527	7.35295e-22	conserved hypothetical protein [Source:BROAD_F_oxysporum;Acc:FOXG_07652]
FOXG_01535	142.676	130.038	132.615	8.02812	22.4033	7.1941	135.11	12.5419	3.39701	7.516e-22	hypothetical protein similar to ABC transporter [Source:BROAD_F_oxysporum;Acc:FOXG_01535]
FOXG_08562	2397.78	2304.31	2552.28	1373.7	1333.41	1311.38	2418.12	1339.5	0.851972	7.54509e-22	hypothetical protein similar to MFS multidrug transporter [Source:BROAD_F_oxysporum;Acc:FOXG_08562]
FOXG_00908	3218.93	2935.77	3215.36	5300.34	5601.67	5861.13	3123.35	5587.71	-0.839014	7.55677e-22	conserved hypothetical protein [Source:BROAD_F_oxysporum;Acc:FOXG_00908]
FOXG_11327	2146.3	2289.98	2219.62	1237.22	1235.5	1287.74	2218.63	1253.49	0.823941	7.60954e-22	hypothetical protein similar to ABC transporter Adp1 [Source:BROAD_F_oxysporum;Acc:FOXG_11327]
FOXG_07886	219.659	230.321	210.162	620.841	497.022	636.164	220.047	584.676	-1.40845	7.97139e-22	conserved hypothetical protein [Source:BROAD_F_oxysporum;Acc:FOXG_07886]
FOXG_07602	863.24	905.855	876.61	456.711	420.685	403.897	881.902	427.098	1.04517	8.05485e-22	DNA repair protein RAD16 [Source:BROAD_F_oxysporum;Acc:FOXG_07602]
FOXG_05120	318.198	346.032	421.447	99.0135	125.293	105.856	361.892	110.054	1.71414	8.55564e-22	conserved hypothetical protein [Source:BROAD_F_oxysporum;Acc:FOXG_05120]
FOXG_01162	433.16	427.581	415.828	181.079	165.121	169.575	425.523	171.925	1.30778	8.59361e-22	predicted protein [Source:BROAD_F_oxysporum;Acc:FOXG_01162]
novel.214	643.581	649.086	724.889	273.848	265.521	317.568	672.519	285.646	1.23758	9.54055e-22	PF13445:RING-type zinc-finger
FOXG_13579	61.5867	79.345	65.1838	256.9	231.501	246.655	68.7052	245.019	-1.83546	9.75251e-22	hypothetical protein similar to actVA 4 protein [Source:BROAD_F_oxysporum;Acc:FOXG_13579]
FOXG_08751	1981.04	2012.28	1722.88	3786.6	4122.22	4967.01	1905.4	4291.94	-1.17117	9.82214e-22	hypothetical protein [Source:BROAD_F_oxysporum;Acc:FOXG_08751]
FOXG_00645	885.822	863.979	1054.18	161.454	155.994	314.485	934.66	210.644	2.15449	1.20727e-21	peroxisomal 2,4-dienoyl-CoA reductase SPS19 [Source:BROAD_F_oxysporum;Acc:FOXG_00645]
FOXG_11329	440.345	465.05	442.8	1293.42	1085.32	942.426	449.398	1107.05	-1.3014	1.31115e-21	nucleolar GTP-binding protein 2 [Source:BROAD_F_oxysporum;Acc:FOXG_11329]
FOXG_13474	3839.93	3673.01	3698.62	6435.88	6338.49	7195.12	3737.19	6656.5	-0.83257	1.34404e-21	conserved hypothetical protein [Source:BROAD_F_oxysporum;Acc:FOXG_13474]
FOXG_16838	8221.82	7326.19	7363.52	14298.1	13944.8	16722.2	7637.18	14988.4	-0.97259	1.35308e-21	hypothetical protein similar to endoglucanase [Source:BROAD_F_oxysporum;Acc:FOXG_16838]
FOXG_04080	384.917	384.603	433.809	152.534	152.675	159.298	401.11	154.836	1.37371	1.35883e-21	conserved hypothetical protein [Source:BROAD_F_oxysporum;Acc:FOXG_04080]
FOXG_11041	962.805	1005.04	921.564	490.607	490.384	455.283	963.135	478.758	1.00754	1.40027e-21	hypothetical protein similar to DNA repair protein rad14 [Source:BROAD_F_oxysporum;Acc:FOXG_11041]
FOXG_02224	1100.35	1135.07	1122.73	1932.1	1969.83	2036.96	1119.39	1979.63	-0.822428	1.41675e-21	conserved hypothetical protein [Source:BROAD_F_oxysporum;Acc:FOXG_02224]
FOXG_13678	631.264	636.964	596.769	1188.16	1218.91	1155.17	621.666	1187.41	-0.933732	1.43557e-21	predicted protein [Source:BROAD_F_oxysporum;Acc:FOXG_13678]
FOXG_03722	1113.69	1249.68	1047.44	2222.01	2177.27	2161.31	1136.94	2186.86	-0.943743	1.45269e-21	hypothetical protein similar to serine palmitoyltransferase 1 [Source:BROAD_F_oxysporum;Acc:FOXG_03722]
FOXG_15303	137.544	117.915	126.996	17.8403	21.5736	21.5823	127.485	20.332	2.65032	1.67853e-21	conserved hypothetical protein [Source:BROAD_F_oxysporum;Acc:FOXG_15303]
FOXG_08561	12955.8	12898	13471.7	28175.1	32090.7	44782.2	13108.5	35016	-1.41748	1.92617e-21	positive regulator of purine utilization [Source:BROAD_F_oxysporum;Acc:FOXG_08561]
FOXG_01659	1616.65	1562.66	1440.79	3659.93	3268.4	2856.06	1540.03	3261.46	-1.08266	1.9626e-21	importin subunit alpha [Source:BROAD_F_oxysporum;Acc:FOXG_01659]
FOXG_10988	281.246	261.177	323.671	93.6614	92.1026	89.4123	288.698	91.7255	1.65301	2.09617e-21	hypothetical protein similar to amidohydrolase family protein [Source:BROAD_F_oxysporum;Acc:FOXG_10988]
FOXG_08417	571.73	580.761	606.884	262.252	261.372	215.823	586.458	246.482	1.2474	2.14979e-21	thioredoxin [Source:BROAD_F_oxysporum;Acc:FOXG_08417]
FOXG_00039	12452.8	11831.2	14302.2	6195.93	5140.32	4251.71	12862.1	5195.99	1.30748	2.23118e-21	alternative oxidase, mitochondrial precursor [Source:BROAD_F_oxysporum;Acc:FOXG_00039]
FOXG_09492	4822.24	4794.86	4949.47	2134.59	2022.11	2667.98	4855.52	2274.89	1.09448	2.48766e-21	ribonucleoside-diphosphate reductase small chain [Source:BROAD_F_oxysporum;Acc:FOXG_09492]
novel.405	19839.1	19213.6	21542.1	11111.8	10980.1	12130.3	20198.3	11407.4	0.824334	2.5481e-21	-
FOXG_01955	28067.1	27231.9	29445.1	13754	13660.2	16530	28248	14648.1	0.947536	2.70016e-21	hypothetical protein similar to cutinase G-box binding protein [Source:BROAD_F_oxysporum;Acc:FOXG_01955]
FOXG_10629	506.037	441.908	477.64	981.215	955.046	1095.56	475.195	1010.61	-1.08736	3.21394e-21	conserved hypothetical protein [Source:BROAD_F_oxysporum;Acc:FOXG_10629]
FOXG_09202	374.652	395.623	425.942	149.858	147.696	164.436	398.739	153.997	1.37415	3.34536e-21	predicted protein [Source:BROAD_F_oxysporum;Acc:FOXG_09202]
FOXG_04340	1054.16	1063.44	1035.07	1847.36	2081.85	2202.42	1050.89	2043.88	-0.959354	3.42207e-21	hypothetical protein similar to ytp1 protein [Source:BROAD_F_oxysporum;Acc:FOXG_04340]
novel.54	251.479	254.565	242.753	603.001	549.297	691.661	249.599	614.653	-1.2985	3.48052e-21	-
FOXG_06276	11857.5	11772.8	11312.8	18490.5	18634.6	18319.2	11647.7	18481.5	-0.666025	3.98541e-21	hypothetical protein similar to elongation factor 2 [Source:BROAD_F_oxysporum;Acc:FOXG_06276]
FOXG_14218	145.755	152.078	176.446	37.4646	28.2116	28.7764	158.093	31.4842	2.32612	4.16928e-21	conserved hypothetical protein [Source:BROAD_F_oxysporum;Acc:FOXG_14218]
FOXG_00615	1905.08	1921.91	1907.19	3351.29	3464.22	3977.31	1911.39	3597.61	-0.912084	4.33324e-21	hypothetical protein [Source:BROAD_F_oxysporum;Acc:FOXG_00615]
FOXG_11141	567.624	517.947	659.705	227.463	244.777	213.767	581.759	228.669	1.34512	4.51872e-21	conserved hypothetical protein [Source:BROAD_F_oxysporum;Acc:FOXG_11141]
FOXG_00461	1396.99	1267.32	1463.26	2684.96	2491.75	2898.19	1375.86	2691.63	-0.967799	4.90712e-21	hypothetical protein [Source:BROAD_F_oxysporum;Acc:FOXG_00461]
FOXG_02142	1965.64	2044.24	2016.2	851.873	815.648	1076.03	2008.69	914.517	1.13663	4.93669e-21	hypothetical protein similar to bete-glucosidase [Source:BROAD_F_oxysporum;Acc:FOXG_02142]
FOXG_07108	98.5387	128.936	128.12	386.242	339.369	341.206	118.531	355.606	-1.58771	5.0916e-21	predicted protein [Source:BROAD_F_oxysporum;Acc:FOXG_07108]
FOXG_05510	594.312	634.76	602.388	1278.26	1174.1	1139.75	610.487	1197.37	-0.972294	5.52374e-21	conserved hypothetical protein [Source:BROAD_F_oxysporum;Acc:FOXG_05510]
novel.77	734.935	587.373	655.21	1383.51	1331.75	1382.29	659.173	1365.85	-1.05026	5.76024e-21	-
FOXG_10898	1364.15	1528.49	1457.64	2690.31	3202.02	3545.66	1450.09	3146	-1.11727	6.29647e-21	predicted protein [Source:BROAD_F_oxysporum;Acc:FOXG_10898]
novel.92	1466.79	1293.76	1401.45	702.907	616.507	721.465	1387.34	680.293	1.02937	6.41348e-21	-
FOXG_09418	29879.8	25528.2	29074.2	6704.37	7724.17	12053.2	28160.7	8827.25	1.67379	6.59525e-21	heat shock protein HSP98 [Source:BROAD_F_oxysporum;Acc:FOXG_09418]
FOXG_04015	102.644	121.222	91.0325	13.3802	9.95704	9.24955	104.966	10.8623	3.26794	7.01728e-21	hypothetical protein similar to aminoglycoside acetyltransferase [Source:BROAD_F_oxysporum;Acc:FOXG_04015]
FOXG_09046	347.965	349.338	292.203	1090.04	864.603	764.63	329.835	906.424	-1.45851	7.13522e-21	calcium-transporting ATPase 3 [Source:BROAD_F_oxysporum;Acc:FOXG_09046]
FOXG_11169	570.703	610.516	719.27	270.28	230.671	258.987	633.496	253.313	1.3229	7.20149e-21	conserved hypothetical protein [Source:BROAD_F_oxysporum;Acc:FOXG_11169]
FOXG_00161	1633.07	1596.82	1494.73	2668.9	2895.01	2931.08	1574.87	2831.66	-0.846118	7.96408e-21	hypothetical protein similar to NAD dependent epimerase/dehydratase family protein [Source:BROAD_F_oxysporum;Acc:FOXG_00161]
FOXG_09809	532.725	541.089	543.948	201.595	177.567	245.627	539.254	208.263	1.37707	8.24338e-21	conserved hypothetical protein [Source:BROAD_F_oxysporum;Acc:FOXG_09809]
FOXG_01463	817.05	683.249	772.091	1999.89	2163.17	1532.34	757.463	1898.47	-1.32598	8.72531e-21	hypothetical protein similar to actin binding protein [Source:BROAD_F_oxysporum;Acc:FOXG_01463]
FOXG_06385	3386.24	3605.79	3710.98	1445.06	1510.15	1921.85	3567.67	1625.69	1.13467	8.74981e-21	ferrochelatase, mitochondrial precursor [Source:BROAD_F_oxysporum;Acc:FOXG_06385]
FOXG_04379	3310.28	2998.58	3181.64	1758.16	1811.35	1862.24	3163.5	1810.58	0.805352	8.78899e-21	conserved hypothetical protein [Source:BROAD_F_oxysporum;Acc:FOXG_04379]
FOXG_01631	863.24	827.612	714.774	1907.12	1817.16	1550.84	801.876	1758.38	-1.13283	8.79976e-21	hypothetical protein similar to chromosome segregation protein [Source:BROAD_F_oxysporum;Acc:FOXG_01631]
FOXG_10110	161.152	136.65	132.615	7.13611	24.0629	19.5268	143.472	16.9086	3.08335	8.83064e-21	conserved hypothetical protein [Source:BROAD_F_oxysporum;Acc:FOXG_10110]
FOXG_12171	1236.87	1210.01	1341.89	591.405	634.761	680.356	1262.92	635.507	0.991496	1.00818e-20	conserved hypothetical protein [Source:BROAD_F_oxysporum;Acc:FOXG_12171]
FOXG_04755	803.706	802.266	887.848	312.205	337.71	409.036	831.274	352.983	1.23798	1.06309e-20	conserved hypothetical protein [Source:BROAD_F_oxysporum;Acc:FOXG_04755]
novel.33	303.828	220.403	276.469	53.5208	81.3158	56.525	266.9	63.7872	2.05944	1.06808e-20	-
FOXG_17129	532.725	487.09	584.406	171.267	162.632	229.183	534.741	187.694	1.5151	1.14363e-20	conserved hypothetical protein [Source:BROAD_F_oxysporum;Acc:FOXG_17129]
FOXG_13687	104.697	114.609	115.757	14.2722	18.2546	13.3605	111.688	15.2958	2.85794	1.19735e-20	predicted protein [Source:BROAD_F_oxysporum;Acc:FOXG_13687]
FOXG_09929	3636.69	3913.25	3948.12	1414.73	1133.44	681.384	3832.69	1076.52	1.83112	1.19827e-20	hypothetical protein [Source:BROAD_F_oxysporum;Acc:FOXG_09929]
FOXG_08665	345.912	395.623	407.961	817.084	940.111	1096.59	383.165	951.26	-1.31179	1.31901e-20	conserved hypothetical protein [Source:BROAD_F_oxysporum;Acc:FOXG_08665]
FOXG_13008	1365.17	1521.88	1332.9	2486.93	2674.3	2588.85	1406.65	2583.36	-0.877099	1.3246e-20	conserved hypothetical protein [Source:BROAD_F_oxysporum;Acc:FOXG_13008]
FOXG_00580	3778.34	3809.66	3776.16	1738.53	1808.86	2182.89	3788.06	1910.1	0.988501	1.41751e-20	hypothetical protein similar to iron only hydrogenase large subunit [Source:BROAD_F_oxysporum;Acc:FOXG_00580]
FOXG_07933	1636.15	1570.37	1519.46	2654.63	2714.12	2832.42	1575.33	2733.72	-0.794826	1.47059e-20	hypothetical protein similar to DENN domain protein [Source:BROAD_F_oxysporum;Acc:FOXG_07933]
FOXG_06384	4921.8	4945.84	4778.65	7938.03	7654.48	8081.02	4882.1	7891.18	-0.692634	1.47325e-20	conserved hypothetical protein [Source:BROAD_F_oxysporum;Acc:FOXG_06384]
FOXG_08912	1379.54	1534	1084.52	487.931	383.346	270.292	1332.69	380.523	1.8066	1.50453e-20	general amino-acid permease GAP1 [Source:BROAD_F_oxysporum;Acc:FOXG_08912]
FOXG_07603	3081.39	2734.1	3179.4	1638.63	1595.62	1666.97	2998.29	1633.74	0.876173	1.51886e-20	ornithine decarboxylase [Source:BROAD_F_oxysporum;Acc:FOXG_07603]
FOXG_02078	16234.3	16753.9	16927.6	7687.37	5848.1	4511.73	16638.6	6015.73	1.46757	1.57454e-20	4-aminobutyrate aminotransferase [Source:BROAD_F_oxysporum;Acc:FOXG_02078]
FOXG_05456	879.663	908.059	790.073	1577.97	1627.15	1641.28	859.265	1615.47	-0.910426	1.57931e-20	conserved hypothetical protein [Source:BROAD_F_oxysporum;Acc:FOXG_05456]
FOXG_10405	1198.89	1074.46	1091.27	2102.48	2015.47	2305.19	1121.54	2141.05	-0.932054	1.62204e-20	hypothetical protein [Source:BROAD_F_oxysporum;Acc:FOXG_10405]
FOXG_02433	4932.07	5112.24	4837.09	2430.74	2473.5	2930.05	4960.47	2611.43	0.926142	1.68354e-20	hypothetical protein similar to hydrolase [Source:BROAD_F_oxysporum;Acc:FOXG_02433]
FOXG_04330	616.893	591.781	627.113	1185.49	1173.27	1108.92	611.929	1155.89	-0.917967	1.68436e-20	conserved hypothetical protein [Source:BROAD_F_oxysporum;Acc:FOXG_04330]
FOXG_09941	34.8991	20.9383	16.8579	136.478	163.461	168.547	24.2318	156.162	-2.6775	1.77445e-20	conserved hypothetical protein [Source:BROAD_F_oxysporum;Acc:FOXG_09941]
FOXG_05746	1298.45	1227.64	1576.77	581.593	608.209	652.607	1367.62	614.136	1.15542	1.86439e-20	conserved hypothetical protein [Source:BROAD_F_oxysporum;Acc:FOXG_05746]
FOXG_01077	8795.61	8707.01	9293.19	5119.27	5300.47	5587.76	8931.94	5335.83	0.743368	1.88753e-20	conserved hypothetical protein [Source:BROAD_F_oxysporum;Acc:FOXG_01077]
FOXG_15469	303.828	335.012	312.433	102.582	96.2514	125.383	317.091	108.072	1.55814	1.97389e-20	uric acid-xanthine permease [Source:BROAD_F_oxysporum;Acc:FOXG_15469]
FOXG_01776	5851.76	5371.22	5612.55	3269.23	3133.15	3429.53	5611.84	3277.3	0.77628	2.01325e-20	conserved hypothetical protein [Source:BROAD_F_oxysporum;Acc:FOXG_01776]
FOXG_04524	94.4329	99.1813	111.262	8.92014	13.2761	4.11091	101.625	8.76903	3.49779	2.10464e-20	conserved hypothetical protein [Source:BROAD_F_oxysporum;Acc:FOXG_04524]
FOXG_12762	911.483	854.061	950.784	1684.12	1676.93	1604.28	905.443	1655.11	-0.870517	2.30895e-20	conserved hypothetical protein [Source:BROAD_F_oxysporum;Acc:FOXG_12762]
FOXG_00610	658.978	671.126	720.393	1509.29	1375.73	1262.05	683.499	1382.36	-1.0169	2.33342e-20	conserved hypothetical protein [Source:BROAD_F_oxysporum;Acc:FOXG_00610]
FOXG_12682	3033.14	2736.3	2689.39	1456.66	1415.56	1145.92	2819.61	1339.38	1.07322	2.38429e-20	conserved hypothetical protein [Source:BROAD_F_oxysporum;Acc:FOXG_12682]
FOXG_10001	140.623	181.832	150.597	422.814	443.088	568.334	157.684	478.079	-1.59956	2.40784e-20	hypothetical protein similar to aquaglyceroporin [Source:BROAD_F_oxysporum;Acc:FOXG_10001]
FOXG_13651	207.342	175.22	215.781	23.1924	27.3819	52.4141	199.448	34.3294	2.55629	2.41042e-20	conserved hypothetical protein [Source:BROAD_F_oxysporum;Acc:FOXG_13651]
novel.114	354.123	395.623	474.268	127.558	116.165	154.159	408.005	132.628	1.6248	2.52543e-20	-
FOXG_03526	132.411	103.589	106.767	15.1642	12.4463	18.4991	114.256	15.3699	2.908	2.59875e-20	conserved hypothetical protein [Source:BROAD_F_oxysporum;Acc:FOXG_03526]
FOXG_04047	690.797	660.106	765.348	300.609	279.627	341.206	705.417	307.147	1.20183	2.61717e-20	conserved hypothetical protein [Source:BROAD_F_oxysporum;Acc:FOXG_04047]
FOXG_01182	8937.26	8981.41	8989.74	14050.1	13912.5	13819.9	8969.47	13927.5	-0.634854	2.69197e-20	biotin synthase [Source:BROAD_F_oxysporum;Acc:FOXG_01182]
FOXG_02475	687.718	692.065	708.031	1349.62	1304.37	1230.19	695.938	1294.73	-0.896156	2.8878e-20	conserved hypothetical protein [Source:BROAD_F_oxysporum;Acc:FOXG_02475]
FOXG_00190	16563.7	17681.8	18072.8	32286.4	30633.7	28230.7	17439.4	30383.6	-0.800991	2.89818e-20	glucosamine-fructose-6-phosphate aminotransferase [Source:BROAD_F_oxysporum;Acc:FOXG_00190]
FOXG_08497	1279.98	1343.35	1435.17	441.547	558.424	646.441	1352.83	548.804	1.30283	3.04387e-20	predicted protein [Source:BROAD_F_oxysporum;Acc:FOXG_08497]
FOXG_02087	1500.66	1535.11	1648.7	454.927	480.427	721.465	1561.49	552.273	1.5016	3.11199e-20	predicted protein [Source:BROAD_F_oxysporum;Acc:FOXG_02087]
novel.558	130.359	126.732	175.322	9.81215	26.5521	15.4159	144.137	17.2601	3.04786	3.49362e-20	PF13639:Ring finger domain
FOXG_12923	142.676	156.486	139.358	35.6805	23.2331	24.6655	146.173	27.8597	2.3903	3.51462e-20	conserved hypothetical protein [Source:BROAD_F_oxysporum;Acc:FOXG_12923]
FOXG_09243	6227.44	6237.4	6612.78	3861.53	3426.88	3741.96	6359.21	3676.79	0.790528	3.56215e-20	conserved hypothetical protein [Source:BROAD_F_oxysporum;Acc:FOXG_09243]
FOXG_08842	1836.31	1837.06	1731.87	3704.53	3657.55	3068.8	1801.74	3476.96	-0.948707	3.7489e-20	T-complex protein 1 subunit beta [Source:BROAD_F_oxysporum;Acc:FOXG_08842]
FOXG_03156	942.276	838.633	809.178	2786.65	2384.71	1781.05	863.362	2317.47	-1.42466	3.76211e-20	hypothetical protein similar to Hsp70 chaperone BiP [Source:BROAD_F_oxysporum;Acc:FOXG_03156]
FOXG_03705	132.411	111.303	124.748	338.965	380.857	499.476	122.821	406.433	-1.72382	3.76565e-20	conserved hypothetical protein [Source:BROAD_F_oxysporum;Acc:FOXG_03705]
FOXG_00396	3075.23	2687.81	2818.64	5236.12	5122.07	4845.74	2860.56	5067.97	-0.825051	3.83281e-20	conserved hypothetical protein [Source:BROAD_F_oxysporum;Acc:FOXG_00396]
FOXG_17467	70.8247	78.243	71.927	300.609	227.352	373.065	73.6649	300.342	-2.02532	3.91322e-20	conserved hypothetical protein [Source:BROAD_F_oxysporum;Acc:FOXG_17467]
FOXG_09785	1135.25	932.304	1032.83	374.646	282.116	445.006	1033.46	367.256	1.49566	4.17188e-20	hypothetical protein similar to nonribosomal peptide synthetase 6 [Source:BROAD_F_oxysporum;Acc:FOXG_09785]
FOXG_10556	539.91	481.58	521.47	1014.22	1047.15	1216.83	514.32	1092.73	-1.08606	4.23988e-20	conserved hypothetical protein [Source:BROAD_F_oxysporum;Acc:FOXG_10556]
FOXG_03186	1446.26	1308.09	1549.8	583.377	685.376	725.576	1434.72	664.776	1.11048	4.27759e-20	conserved hypothetical protein [Source:BROAD_F_oxysporum;Acc:FOXG_03186]
FOXG_09271	804.733	807.776	769.843	389.81	409.898	353.538	794.117	384.416	1.04491	4.28915e-20	conserved hypothetical protein [Source:BROAD_F_oxysporum;Acc:FOXG_09271]
FOXG_00325	3392.4	3231.1	3226.6	1821.49	1873.58	2012.29	3283.37	1902.46	0.787803	4.79311e-20	hypothetical protein similar to IZH family channel protein Izh3 [Source:BROAD_F_oxysporum;Acc:FOXG_00325]
FOXG_00296	5422.71	5642.31	5695.72	9274.26	8816.96	8894.99	5586.91	8995.4	-0.687196	4.97185e-20	GTP-binding nuclear protein GSP1/Ran [Source:BROAD_F_oxysporum;Acc:FOXG_00296]
FOXG_11025	9250.32	9589.73	9617.98	5005.09	4898.03	5806.66	9486.01	5236.6	0.857426	5.12102e-20	hypothetical protein similar to hydrolase [Source:BROAD_F_oxysporum;Acc:FOXG_11025]
FOXG_12351	1790.12	1732.37	1794.8	462.063	511.958	794.434	1772.43	589.485	1.59023	5.87905e-20	conserved hypothetical protein [Source:BROAD_F_oxysporum;Acc:FOXG_12351]
FOXG_05183	2627.7	2701.04	2846.73	1350.51	1518.45	1569.34	2725.16	1479.43	0.881507	6.25962e-20	conserved hypothetical protein [Source:BROAD_F_oxysporum;Acc:FOXG_05183]
FOXG_13178	415.71	404.439	504.613	156.994	180.886	157.242	441.587	165.041	1.41744	6.27515e-20	-
FOXG_10899	1775.75	2099.34	1885.83	3554.67	4291.48	4698.77	1920.31	4181.64	-1.12269	6.28837e-20	predicted protein [Source:BROAD_F_oxysporum;Acc:FOXG_10899]
FOXG_01627	188.866	238.035	180.941	42.8167	31.5306	55.4973	202.614	43.2815	2.23869	6.32734e-20	hypothetical protein similar to isopenicillin N-CoA epimerase [Source:BROAD_F_oxysporum;Acc:FOXG_01627]
FOXG_04911	162.178	184.036	155.092	39.2486	38.1687	43.1646	167.102	40.1939	2.05907	6.35804e-20	predicted protein [Source:BROAD_F_oxysporum;Acc:FOXG_04911]
FOXG_16809	176.549	214.893	271.974	55.3048	34.0199	47.2755	221.138	45.5334	2.2831	6.47937e-20	predicted protein [Source:BROAD_F_oxysporum;Acc:FOXG_16809]
FOXG_01811	835.526	858.469	718.146	1615.44	1542.51	1537.48	804.047	1565.14	-0.960624	6.49531e-20	glucan synthesis regulatory protein [Source:BROAD_F_oxysporum;Acc:FOXG_01811]
FOXG_10572	601.497	654.596	720.393	305.961	292.073	260.015	658.829	286.016	1.20157	7.26214e-20	hypothetical protein similar to HesB/YadR/YfhF [Source:BROAD_F_oxysporum;Acc:FOXG_10572]
FOXG_11436	5078.85	4890.74	5502.41	2936.51	2951.43	2592.96	5157.33	2826.97	0.866972	7.33922e-20	succinate-semialdehyde dehydrogenase [Source:BROAD_F_oxysporum;Acc:FOXG_11436]
FOXG_01408	212.474	166.404	160.712	546.804	441.429	504.614	179.863	497.616	-1.46553	8.42753e-20	hypothetical protein similar to enoyl-CoA hydratase/isomerase family protein [Source:BROAD_F_oxysporum;Acc:FOXG_01408]
FOXG_15279	78.0098	81.549	110.138	4.46007	5.80827	7.1941	89.899	5.82081	3.95966	9.21824e-20	conserved hypothetical protein [Source:BROAD_F_oxysporum;Acc:FOXG_15279]
FOXG_00956	7412.99	7267.78	7074.69	11674.7	11293.8	11352.3	7251.82	11440.2	-0.657667	9.54477e-20	hypothetical protein similar to alpha-tubulin B [Source:BROAD_F_oxysporum;Acc:FOXG_00956]
FOXG_02348	205.289	229.219	173.074	503.096	518.596	484.06	202.527	501.917	-1.30924	1.02085e-19	Delta(14)-sterol reductase [Source:BROAD_F_oxysporum;Acc:FOXG_02348]
FOXG_02458	1873.26	1699.31	1674.55	959.807	966.663	873.569	1749.04	933.346	0.905567	1.08389e-19	hypothetical protein similar to nonribosomal peptide synthetase 10 [Source:BROAD_F_oxysporum;Acc:FOXG_02458]
FOXG_01836	3776.29	3703.87	4100.96	2180.97	2293.44	2282.58	3860.37	2252.33	0.777276	1.09092e-19	conserved hypothetical protein [Source:BROAD_F_oxysporum;Acc:FOXG_01836]
FOXG_02931	324.357	391.215	365.254	133.802	134.42	101.745	360.275	123.322	1.54124	1.23639e-19	conserved hypothetical protein [Source:BROAD_F_oxysporum;Acc:FOXG_02931]
FOXG_05167	786.257	944.426	857.504	404.082	421.515	362.788	862.729	396.128	1.12098	1.26102e-19	hydrolase [Source:BROAD_F_oxysporum;Acc:FOXG_05167]
FOXG_05893	108.803	90.3651	83.1655	1.78403	4.14877	1.02773	94.1113	2.32017	5.28697	1.27091e-19	conserved hypothetical protein [Source:BROAD_F_oxysporum;Acc:FOXG_05893]
FOXG_08098	275.087	304.156	269.726	1131.97	926.835	652.607	282.99	903.802	-1.67622	1.38663e-19	conserved hypothetical protein [Source:BROAD_F_oxysporum;Acc:FOXG_08098]
FOXG_12665	3963.1	4154.59	4340.34	2188.11	2134.96	2493.27	4152.68	2272.11	0.870463	1.48069e-19	gamma-aminobutyric acid receptor-associated protein [Source:BROAD_F_oxysporum;Acc:FOXG_12665]
FOXG_01779	1555.06	1428.21	1510.47	3497.59	3249.31	2658.73	1497.91	3135.21	-1.06588	1.5082e-19	conserved hypothetical protein [Source:BROAD_F_oxysporum;Acc:FOXG_01779]
FOXG_01750	713.379	744.961	797.94	285.444	370.07	328.873	752.093	328.129	1.1955	1.64847e-19	hypothetical protein similar to fumarylacetoacetate hydrolase family protein [Source:BROAD_F_oxysporum;Acc:FOXG_01750]
novel.586	461.9	406.643	524.842	167.699	172.589	194.241	464.462	178.176	1.3841	1.66612e-19	-
FOXG_01449	2345.43	2778.18	2499.46	4716.97	4479.84	4514.81	2541.02	4570.54	-0.847123	1.71484e-19	hypothetical protein similar to tropomyosin 1 [Source:BROAD_F_oxysporum;Acc:FOXG_01449]
FOXG_08452	2288.97	2299.9	2647.81	1134.64	1337.56	1204.5	2412.23	1225.57	0.976404	1.75379e-19	conserved hypothetical protein [Source:BROAD_F_oxysporum;Acc:FOXG_08452]
FOXG_07978	1071.61	1079.97	954.156	1921.4	1837.9	2054.43	1035.25	1937.91	-0.903853	1.84489e-19	conserved hypothetical protein [Source:BROAD_F_oxysporum;Acc:FOXG_07978]
FOXG_13760	1877.37	1856.89	1915.06	912.53	982.428	1098.64	1883.11	997.866	0.917094	1.87421e-19	conserved hypothetical protein [Source:BROAD_F_oxysporum;Acc:FOXG_13760]
FOXG_16842	502.958	541.089	620.37	239.06	196.652	166.492	554.806	200.734	1.46371	1.91918e-19	hypothetical protein similar to potassium uptake transporter [Source:BROAD_F_oxysporum;Acc:FOXG_16842]
FOXG_11658	1054.16	1088.79	1157.57	1973.13	1882.71	2061.62	1100.17	1972.49	-0.842211	1.94702e-19	hypothetical protein [Source:BROAD_F_oxysporum;Acc:FOXG_11658]
FOXG_05185	7290.84	6779.59	6801.59	3816.03	3886.57	4318.51	6957.34	4007.04	0.796314	1.98122e-19	C-1-tetrahydrofolate synthase, mitochondrial precursor [Source:BROAD_F_oxysporum;Acc:FOXG_05185]
FOXG_17276	164.231	139.956	138.235	35.6805	28.2116	20.5546	147.474	28.1489	2.38075	2.06602e-19	predicted protein [Source:BROAD_F_oxysporum;Acc:FOXG_17276]
FOXG_13067	218.633	170.812	256.24	23.1924	45.6364	13.3605	215.228	27.3964	2.95296	2.10963e-19	hypothetical protein similar to cation transport ATPase [Source:BROAD_F_oxysporum;Acc:FOXG_13067]
FOXG_05801	100.592	107.997	80.9178	0.892014	3.31901	2.05546	96.5023	2.08883	5.51035	2.30827e-19	conserved hypothetical protein [Source:BROAD_F_oxysporum;Acc:FOXG_05801]
FOXG_00619	344.885	278.81	307.937	691.311	704.461	654.663	310.544	683.478	-1.13755	2.31541e-19	conserved hypothetical protein [Source:BROAD_F_oxysporum;Acc:FOXG_00619]
FOXG_07073	55.428	55.1007	49.4498	206.947	214.076	175.741	53.3262	198.922	-1.90027	2.54267e-19	conserved hypothetical protein [Source:BROAD_F_oxysporum;Acc:FOXG_07073]
FOXG_08612	510.143	437.5	556.31	189.107	160.142	211.712	501.318	186.987	1.42625	2.88677e-19	conserved hypothetical protein [Source:BROAD_F_oxysporum;Acc:FOXG_08612]
FOXG_00572	7667.54	6929.46	6782.49	3989.08	3768.74	3202.4	7126.5	3653.41	0.963712	2.89015e-19	predicted protein [Source:BROAD_F_oxysporum;Acc:FOXG_00572]
FOXG_05509	599.444	551.007	601.264	1288.96	1146.72	1086.31	583.905	1174	-1.00791	3.29322e-19	conserved hypothetical protein [Source:BROAD_F_oxysporum;Acc:FOXG_05509]
FOXG_03731	3127.58	3617.91	3639.05	6403.77	5941.03	6660.7	3461.51	6335.17	-0.872027	3.32415e-19	conserved hypothetical protein [Source:BROAD_F_oxysporum;Acc:FOXG_03731]
FOXG_13225	233.003	241.341	261.859	64.225	75.5076	88.3846	245.401	76.039	1.69449	3.5077e-19	predicted protein [Source:BROAD_F_oxysporum;Acc:FOXG_13225]
FOXG_03112	229.924	249.055	251.744	66.901	81.3158	47.2755	243.574	65.1641	1.89157	3.61614e-19	conserved hypothetical protein [Source:BROAD_F_oxysporum;Acc:FOXG_03112]
FOXG_08360	734.935	639.168	694.545	341.641	326.923	319.623	689.549	329.396	1.06572	3.65e-19	conserved hypothetical protein [Source:BROAD_F_oxysporum;Acc:FOXG_08360]
FOXG_01938	290.484	370.277	359.635	787.648	944.259	754.352	340.132	828.753	-1.28682	3.74794e-19	conserved hypothetical protein [Source:BROAD_F_oxysporum;Acc:FOXG_01938]
FOXG_05346	2567.14	2749.52	2451.14	4292.37	4464.9	4714.19	2589.27	4490.49	-0.794176	3.96221e-19	conserved hypothetical protein [Source:BROAD_F_oxysporum;Acc:FOXG_05346]
FOXG_04993	1289.21	1478.9	1375.6	749.291	746.778	734.825	1381.24	743.632	0.892895	4.22219e-19	hypothetical protein similar to FAD synthetase [Source:BROAD_F_oxysporum;Acc:FOXG_04993]
FOXG_03357	11895.5	11796	12698.5	5217.39	5792.51	6945.39	12130	5985.09	1.01932	4.41364e-19	conserved hypothetical protein [Source:BROAD_F_oxysporum;Acc:FOXG_03357]
FOXG_03759	783.177	805.572	787.825	290.796	386.665	367.927	792.192	348.463	1.18485	4.72618e-19	conserved hypothetical protein [Source:BROAD_F_oxysporum;Acc:FOXG_03759]
FOXG_09938	480.376	538.885	531.585	1000.84	965.003	1053.42	516.949	1006.42	-0.961219	4.72913e-19	predicted protein [Source:BROAD_F_oxysporum;Acc:FOXG_09938]
FOXG_00304	265.849	229.219	221.4	528.072	560.084	643.358	238.823	577.171	-1.27069	4.76016e-19	hypothetical protein [Source:BROAD_F_oxysporum;Acc:FOXG_00304]
FOXG_11472	186.813	249.055	236.01	674.362	562.573	535.446	223.959	590.794	-1.40142	5.19426e-19	conserved hypothetical protein [Source:BROAD_F_oxysporum;Acc:FOXG_11472]
FOXG_10616	534.778	384.603	421.447	1176.57	1073.7	986.619	446.943	1078.96	-1.27072	5.37552e-19	ATP-dependent RNA helicase DBP3 [Source:BROAD_F_oxysporum;Acc:FOXG_10616]
FOXG_05502	335.647	304.156	307.937	118.638	126.123	119.216	315.914	121.326	1.38018	5.96669e-19	transcriptional activator protein acu-15 [Source:BROAD_F_oxysporum;Acc:FOXG_05502]
FOXG_01410	59.5338	70.5289	67.4315	214.975	211.587	270.292	65.8314	232.285	-1.81824	6.34771e-19	conserved hypothetical protein [Source:BROAD_F_oxysporum;Acc:FOXG_01410]
FOXG_01578	192.972	138.854	144.978	495.96	473.789	398.758	158.934	456.169	-1.51988	6.39103e-19	conserved hypothetical protein [Source:BROAD_F_oxysporum;Acc:FOXG_01578]
FOXG_06069	2204.8	2071.79	1962.26	4321.81	3894.86	3567.24	2079.62	3927.97	-0.917489	6.4977e-19	hypothetical protein similar to septin [Source:BROAD_F_oxysporum;Acc:FOXG_06069]
FOXG_07948	187.839	138.854	152.845	532.532	467.151	395.675	159.846	465.12	-1.54022	6.50216e-19	protein MAK16 [Source:BROAD_F_oxysporum;Acc:FOXG_07948]
FOXG_11139	1915.35	1957.18	1998.22	1182.81	1142.57	1097.61	1956.91	1141	0.777805	6.7569e-19	hypothetical protein [Source:BROAD_F_oxysporum;Acc:FOXG_11139]
novel.467	173.469	142.16	202.295	33.8965	35.6794	45.22	172.641	38.2653	2.18018	6.76869e-19	-
FOXG_11260	142.676	113.507	104.519	368.402	319.455	349.427	120.234	345.761	-1.52065	6.99388e-19	conserved hypothetical protein [Source:BROAD_F_oxysporum;Acc:FOXG_11260]
FOXG_03795	128.306	131.14	159.588	31.2205	28.2116	27.7487	139.678	29.0602	2.26298	6.99402e-19	Arylamine N-acetyltransferase 3 [Source:UniProtKB/TrEMBL;Acc:D8FSU5]
FOXG_07010	15.3967	16.5302	10.1147	118.638	92.9324	129.494	14.0139	113.688	-3.0136	7.01036e-19	conserved hypothetical protein [Source:BROAD_F_oxysporum;Acc:FOXG_07010]
FOXG_14244	2126.79	2194.11	2180.29	3621.58	3453.43	3811.84	2167.06	3628.95	-0.743613	7.04972e-19	predicted protein [Source:BROAD_F_oxysporum;Acc:FOXG_14244]
FOXG_06120	1987.2	1743.39	1715.01	3314.72	3138.13	3282.56	1815.2	3245.14	-0.83773	7.19321e-19	conserved hypothetical protein [Source:BROAD_F_oxysporum;Acc:FOXG_06120]
FOXG_08059	773.939	780.226	862	417.462	404.09	393.62	805.388	405.057	0.990793	7.20274e-19	conserved hypothetical protein [Source:BROAD_F_oxysporum;Acc:FOXG_08059]
FOXG_11049	668.216	581.863	591.15	1495.91	1315.16	1168.53	613.743	1326.53	-1.11198	7.26631e-19	ATP-dependent RNA helicase DOB1 [Source:BROAD_F_oxysporum;Acc:FOXG_11049]
FOXG_05182	120939	121935	129497	64704.9	70052.8	77157.7	124123	70638.4	0.813261	7.73833e-19	glutamine synthetase [Source:BROAD_F_oxysporum;Acc:FOXG_05182]
FOXG_00604	94.4329	74.9369	88.7848	356.805	330.242	237.405	86.0516	308.151	-1.8414	8.05709e-19	hypothetical protein similar to periodic tryptophan protein Pwp1 [Source:BROAD_F_oxysporum;Acc:FOXG_00604]
FOXG_04440	2446.02	2168.76	2573.64	1021.36	1106.89	1305.21	2396.14	1144.49	1.06684	8.13805e-19	hypothetical protein similar to glutaredoxin [Source:BROAD_F_oxysporum;Acc:FOXG_04440]
FOXG_10445	244.294	219.301	182.065	517.368	565.062	695.772	215.22	592.734	-1.45895	8.49654e-19	conserved hypothetical protein [Source:BROAD_F_oxysporum;Acc:FOXG_10445]
FOXG_01859	1347.72	1228.75	1240.74	2434.3	2218.76	2190.09	1272.4	2281.05	-0.841985	8.78277e-19	hypothetical protein similar to rna binding protein with Puf domains [Source:BROAD_F_oxysporum;Acc:FOXG_01859]
FOXG_07174	130.359	134.446	129.244	13.3802	24.8926	28.7764	131.349	22.3497	2.56338	8.87234e-19	conserved hypothetical protein [Source:BROAD_F_oxysporum;Acc:FOXG_07174]
FOXG_08550	153.967	158.69	177.57	379.998	397.452	437.812	163.409	405.087	-1.30973	9.09835e-19	conserved hypothetical protein [Source:BROAD_F_oxysporum;Acc:FOXG_08550]
novel.636	185.787	215.995	247.249	57.0889	59.7422	66.8023	216.343	61.2111	1.82324	9.34348e-19	-
FOXG_11443	1460.63	1654.12	1535.19	867.929	832.243	760.519	1549.98	820.23	0.917195	9.8077e-19	aldehyde dehydrogenase, mitochondrial precursor [Source:BROAD_F_oxysporum;Acc:FOXG_11443]
FOXG_05490	21776	22256.3	22697.4	14388.2	14727.3	14136.4	22243.3	14417.3	0.625519	9.84412e-19	asparagine synthetase 2 [Source:BROAD_F_oxysporum;Acc:FOXG_05490]
FOXG_10369	485.508	411.051	436.057	150.75	160.142	199.379	444.206	170.091	1.38932	1.00959e-18	hypothetical protein similar to allantoate permease [Source:BROAD_F_oxysporum;Acc:FOXG_10369]
FOXG_11701	326.409	239.137	332.662	75.8212	77.9968	103.801	299.403	85.8728	1.80766	1.06372e-18	predicted protein [Source:BROAD_F_oxysporum;Acc:FOXG_11701]
FOXG_15425	383.89	357.053	321.424	128.45	141.888	141.826	354.122	137.388	1.36711	1.08356e-18	conserved hypothetical protein [Source:BROAD_F_oxysporum;Acc:FOXG_15425]
FOXG_03227	167.311	167.506	180.941	402.298	451.386	392.592	171.919	415.425	-1.27452	1.10444e-18	conserved hypothetical protein [Source:BROAD_F_oxysporum;Acc:FOXG_03227]
novel.448	78.0098	82.651	97.7757	244.412	270.5	262.071	86.1455	258.994	-1.59022	1.13559e-18	-
FOXG_05979	1020.29	1076.67	1110.37	585.161	548.467	491.254	1069.11	541.627	0.979542	1.1752e-18	conserved hypothetical protein [Source:BROAD_F_oxysporum;Acc:FOXG_05979]
FOXG_06266	3175.82	3018.42	3176.02	1581.54	1599.76	1887.94	3123.42	1689.75	0.887076	1.21268e-18	conserved hypothetical protein [Source:BROAD_F_oxysporum;Acc:FOXG_06266]
FOXG_13145	396.208	476.07	459.658	177.511	187.524	143.882	443.979	169.639	1.38349	1.22367e-18	predicted protein [Source:BROAD_F_oxysporum;Acc:FOXG_13145]
FOXG_10105	90.3272	114.609	87.661	3.56805	0.829753	1.02773	97.5325	1.80851	5.74503	1.2584e-18	predicted protein [Source:BROAD_F_oxysporum;Acc:FOXG_10105]
FOXG_05909	793.442	934.508	845.142	407.65	419.855	440.895	857.697	422.8	1.02085	1.37053e-18	conserved hypothetical protein [Source:BROAD_F_oxysporum;Acc:FOXG_05909]
FOXG_07428	705.168	714.105	684.43	1313.94	1219.74	1250.74	701.234	1261.47	-0.846992	1.38519e-18	conserved hypothetical protein [Source:BROAD_F_oxysporum;Acc:FOXG_07428]
FOXG_12357	162.178	209.383	188.808	32.1125	49.7852	21.5823	186.79	34.4933	2.41997	1.43714e-18	hypothetical protein similar to acetamidase [Source:BROAD_F_oxysporum;Acc:FOXG_12357]
FOXG_06225	1062.37	1105.32	968.766	1906.23	2061.94	1830.38	1045.49	1932.85	-0.886787	1.44695e-18	conserved hypothetical protein [Source:BROAD_F_oxysporum;Acc:FOXG_06225]
FOXG_03259	693.877	513.538	638.352	264.036	212.417	239.461	615.256	238.638	1.3676	1.5084e-18	hypothetical protein [Source:BROAD_F_oxysporum;Acc:FOXG_03259]
FOXG_08205	741.093	776.92	851.885	361.265	365.921	273.376	789.966	333.521	1.24084	1.55624e-18	hypothetical protein similar to catalytic LigB subunit of aromatic ring-opening dioxygenase [Source:BROAD_F_oxysporum;Acc:FOXG_08205]
FOXG_06451	1270.74	1294.87	1282.32	3881.15	3207	2452.16	1282.64	3180.1	-1.31027	1.67598e-18	hypothetical protein similar to choline oxidase CodA [Source:BROAD_F_oxysporum;Acc:FOXG_06451]
FOXG_06189	1123.96	1146.09	1320.53	454.927	520.255	612.526	1196.86	529.236	1.17856	1.73048e-18	predicted protein [Source:BROAD_F_oxysporum;Acc:FOXG_06189]
FOXG_03668	1821.94	1813.91	1706.02	4108.61	3714.81	3085.24	1780.62	3636.22	-1.03028	2.0059e-18	hypothetical protein similar to protein mannosyltransferase 1 [Source:BROAD_F_oxysporum;Acc:FOXG_03668]
FOXG_00196	1053.13	1191.28	1205.9	2106.94	2022.94	2300.06	1150.1	2143.31	-0.898064	2.03183e-18	conserved hypothetical protein [Source:BROAD_F_oxysporum;Acc:FOXG_00196]
FOXG_00136	1289.21	1303.68	1312.67	718.071	701.142	769.768	1301.85	729.66	0.836173	2.05874e-18	conserved hypothetical protein [Source:BROAD_F_oxysporum;Acc:FOXG_00136]
FOXG_01719	290.484	296.442	268.602	586.053	594.933	587.86	285.176	589.615	-1.04762	2.18725e-18	conserved hypothetical protein [Source:BROAD_F_oxysporum;Acc:FOXG_01719]
FOXG_11954	1318.98	1230.95	1371.11	414.786	524.404	640.274	1307.01	526.488	1.31339	2.23309e-18	conserved hypothetical protein [Source:BROAD_F_oxysporum;Acc:FOXG_11954]
FOXG_08173	46445.6	45206.8	50845.6	29856.6	28760.1	28467	47499.3	29027.9	0.710453	2.40626e-18	histone H2A [Source:BROAD_F_oxysporum;Acc:FOXG_08173]
FOXG_05956	1723.4	1882.24	1843.13	1008.87	1081.17	983.536	1816.26	1024.52	0.825207	2.54692e-18	homoserine dehydrogenase [Source:BROAD_F_oxysporum;Acc:FOXG_05956]
FOXG_00452	1332.33	1246.38	1365.49	681.498	692.844	760.519	1314.73	711.62	0.886554	2.56027e-18	conserved hypothetical protein [Source:BROAD_F_oxysporum;Acc:FOXG_00452]
novel.721	96.4858	116.813	125.872	331.829	307.839	427.535	113.057	355.734	-1.65357	2.57456e-18	PF14529:Endonuclease-reverse transcriptase
FOXG_05439	1760.35	1800.69	1675.67	3806.22	3481.65	2965	1745.57	3417.62	-0.969554	2.85495e-18	hypothetical protein similar to eukaryotic translation initiation factor 3 subunit EifCf [Source:BROAD_F_oxysporum;Acc:FOXG_05439]
FOXG_04427	6684.21	6358.62	6626.27	2571.68	2964.71	3655.63	6556.37	3064	1.09787	3.13886e-18	conserved hypothetical protein [Source:BROAD_F_oxysporum;Acc:FOXG_04427]
FOXG_14853	197.077	195.056	215.781	68.685	46.4662	54.4696	202.638	56.5403	1.8428	3.30809e-18	conserved hypothetical protein [Source:BROAD_F_oxysporum;Acc:FOXG_14853]
FOXG_14485	89.3007	80.447	121.377	2.67604	0	3.08318	97.0415	1.91974	5.72851	3.3431e-18	conserved hypothetical protein [Source:BROAD_F_oxysporum;Acc:FOXG_14485]
FOXG_13422	145.755	128.936	210.162	29.4364	34.8496	26.7209	161.617	30.3357	2.4066	3.70253e-18	conserved hypothetical protein [Source:BROAD_F_oxysporum;Acc:FOXG_13422]
FOXG_01180	828.341	919.08	849.637	436.195	407.409	467.616	865.686	437.073	0.987332	3.71352e-18	histone acetyltransferase GCN5 [Source:BROAD_F_oxysporum;Acc:FOXG_01180]
FOXG_12892	2269.47	2504.88	2116.23	1170.32	1245.46	996.896	2296.86	1137.56	1.01278	3.88157e-18	homoaconitase, mitochondrial precursor [Source:BROAD_F_oxysporum;Acc:FOXG_12892]
FOXG_05311	1713.14	1731.26	1845.38	833.141	805.691	1014.37	1763.26	884.4	0.996802	3.96791e-18	geranylgeranyl pyrophosphate synthetase [Source:BROAD_F_oxysporum;Acc:FOXG_05311]
FOXG_03264	265.849	257.871	283.212	83.8493	69.6993	104.828	268.978	86.1256	1.65063	3.9919e-18	conserved hypothetical protein [Source:BROAD_F_oxysporum;Acc:FOXG_03264]
FOXG_09386	360.282	393.419	339.405	156.102	142.718	123.327	364.369	140.716	1.3697	4.06647e-18	hypothetical protein similar to D-xylulose kinase [Source:BROAD_F_oxysporum;Acc:FOXG_09386]
FOXG_02132	2399.83	2377.04	2125.22	1344.26	1264.54	1318.57	2300.7	1309.13	0.813807	4.33823e-18	D-lactate dehydrogenase 2, mitochondrial precursor [Source:BROAD_F_oxysporum;Acc:FOXG_02132]
FOXG_08260	655.898	692.065	643.971	1209.57	1194.02	1368.93	663.978	1257.51	-0.920629	4.39761e-18	conserved hypothetical protein [Source:BROAD_F_oxysporum;Acc:FOXG_08260]
FOXG_07036	93.4065	83.7531	51.6975	264.036	283.776	267.209	76.2857	271.674	-1.82869	4.55494e-18	predicted protein [Source:BROAD_F_oxysporum;Acc:FOXG_07036]
FOXG_00591	395.181	338.318	338.281	778.728	726.864	715.299	357.26	740.297	-1.05027	4.79179e-18	conserved hypothetical protein [Source:BROAD_F_oxysporum;Acc:FOXG_00591]
FOXG_09472	190.919	241.341	209.038	69.5771	61.4018	62.6914	213.766	64.5567	1.72655	4.99449e-18	conserved hypothetical protein [Source:BROAD_F_oxysporum;Acc:FOXG_09472]
FOXG_07842	307.933	279.912	266.354	613.705	571.7	644.385	284.733	609.93	-1.09716	5.56703e-18	conserved hypothetical protein [Source:BROAD_F_oxysporum;Acc:FOXG_07842]
FOXG_00167	686.692	845.245	806.93	381.782	367.581	340.178	779.622	363.18	1.10055	5.72064e-18	hypothetical protein similar to CORD and CS domain protein [Source:BROAD_F_oxysporum;Acc:FOXG_00167]
FOXG_08081	100.592	106.895	105.643	12.4882	16.5951	20.5546	104.377	16.5459	2.66684	5.78186e-18	conserved hypothetical protein [Source:BROAD_F_oxysporum;Acc:FOXG_08081]
FOXG_08537	2326.95	2428.84	2274.69	1301.45	1361.63	1444.99	2343.49	1369.35	0.775631	5.81731e-18	conserved hypothetical protein [Source:BROAD_F_oxysporum;Acc:FOXG_08537]
FOXG_03009	61115.6	60726.5	68330.6	22046.1	25344.8	33630.3	63390.9	27007.1	1.23098	5.86604e-18	hypothetical protein [Source:BROAD_F_oxysporum;Acc:FOXG_03009]
FOXG_07906	3559.71	3256.45	3431.14	1850.04	1871.92	2113.01	3415.77	1944.99	0.813052	5.901e-18	hypothetical protein similar to CDP-diacylglycerol-inositol 3-phosphatidyltransferase PIS [Source:BROAD_F_oxysporum;Acc:FOXG_07906]
FOXG_11076	871.452	862.877	851.885	1719.8	1559.94	1467.6	862.071	1582.44	-0.876579	6.1145e-18	histone H2A.Z [Source:BROAD_F_oxysporum;Acc:FOXG_11076]
FOXG_07538	1320.01	1530.7	1545.31	3417.3	2750.63	2791.31	1465.34	2986.42	-1.02752	6.21306e-18	conserved hypothetical protein [Source:BROAD_F_oxysporum;Acc:FOXG_07538]
novel.444	224.791	195.056	256.24	59.7649	74.6778	66.8023	225.363	67.0817	1.74632	6.67305e-18	-
FOXG_00385	6113.51	5705.13	5933.97	12424	11359.3	9705.86	5917.54	11163.1	-0.915739	6.70904e-18	elongation factor 1-beta [Source:BROAD_F_oxysporum;Acc:FOXG_00385]
FOXG_05944	2757.03	2591.94	2645.56	1636.84	1559.94	1648.48	2664.84	1615.09	0.722825	7.44417e-18	hypothetical protein similar to stomatin family protein [Source:BROAD_F_oxysporum;Acc:FOXG_05944]
novel.501	1300.51	1215.52	1350.88	464.739	482.087	670.079	1288.97	538.968	1.26015	7.55315e-18	-
FOXG_05344	2123.71	2249.21	2310.65	660.982	745.948	1097.61	2227.86	834.848	1.41745	7.69262e-18	conserved hypothetical protein [Source:BROAD_F_oxysporum;Acc:FOXG_05344]
novel.366	179.628	150.976	195.551	42.8167	33.1901	51.3864	175.385	42.4644	2.05588	7.99141e-18	PF05225:helix-turn-helix, Psq domain|PF03184:DDE superfamily endonuclease
FOXG_06319	3689.04	3738.03	3633.43	6441.23	5864.7	7035.83	3686.84	6447.25	-0.806079	8.54362e-18	glycogen phosphorylase [Source:BROAD_F_oxysporum;Acc:FOXG_06319]
FOXG_03570	5051.14	4808.09	4797.75	2874.07	2987.11	2533.35	4885.66	2798.18	0.803653	8.65616e-18	conserved hypothetical protein [Source:BROAD_F_oxysporum;Acc:FOXG_03570]
FOXG_11428	529.646	553.211	538.328	984.783	1027.23	1178.8	540.395	1063.61	-0.976143	8.90286e-18	hypothetical protein [Source:BROAD_F_oxysporum;Acc:FOXG_11428]
FOXG_00419	4507.12	4494.01	4676.38	2192.57	2222.91	2753.28	4559.17	2389.59	0.932577	9.06866e-18	hypothetical protein similar to MGS207 protein [Source:BROAD_F_oxysporum;Acc:FOXG_00419]
FOXG_05935	4961.83	5067.06	4968.58	3219.28	3179.62	3260.98	4999.16	3219.96	0.634727	9.27953e-18	conserved hypothetical protein [Source:BROAD_F_oxysporum;Acc:FOXG_05935]
FOXG_03391	985.387	1062.34	879.981	2024.87	1912.58	1736.86	975.903	1891.44	-0.954866	9.41804e-18	conserved hypothetical protein [Source:BROAD_F_oxysporum;Acc:FOXG_03391]
FOXG_09352	1735.72	1613.35	1761.09	988.351	955.046	854.042	1703.38	932.48	0.868414	9.46326e-18	anthranilate synthase component 2 [Source:BROAD_F_oxysporum;Acc:FOXG_09352]
FOXG_11057	137.544	120.12	112.386	308.637	316.966	352.511	123.35	326.038	-1.39926	1.03136e-17	conserved hypothetical protein [Source:BROAD_F_oxysporum;Acc:FOXG_11057]
FOXG_03456	31681.2	30730.8	35474.6	11419.6	12640.5	17322.4	32628.9	13794.1	1.24218	1.03742e-17	hypothetical protein similar to vip1 protein [Source:BROAD_F_oxysporum;Acc:FOXG_03456]
FOXG_00713	2284.87	2789.2	2506.2	1106.1	1091.96	710.16	2526.76	969.404	1.38089	1.04674e-17	saccharopine dehydrogenase [Source:BROAD_F_oxysporum;Acc:FOXG_00713]
FOXG_06553	12.3173	47.3866	26.9726	272.064	157.653	290.847	28.8922	240.188	-3.06061	1.08984e-17	conserved hypothetical protein [Source:BROAD_F_oxysporum;Acc:FOXG_06553]
FOXG_01492	2083.68	1969.3	1892.58	5385.98	4697.23	3582.66	1981.85	4555.29	-1.20084	1.09519e-17	hypothetical protein similar to elongation factor 1-gamma 2 [Source:BROAD_F_oxysporum;Acc:FOXG_01492]
FOXG_00483	854.002	903.651	862	426.382	485.406	404.925	873.218	438.904	0.990498	1.1019e-17	conserved hypothetical protein [Source:BROAD_F_oxysporum;Acc:FOXG_00483]
FOXG_04073	163.205	152.078	119.129	405.866	369.24	365.871	144.804	380.326	-1.39131	1.18601e-17	hypothetical protein similar to cell cycle protein kinase [Source:BROAD_F_oxysporum;Acc:FOXG_04073]
FOXG_09048	6579.51	6526.13	7312.95	3002.52	3275.04	3949.56	6806.2	3409.04	0.997796	1.19944e-17	conserved hypothetical protein [Source:BROAD_F_oxysporum;Acc:FOXG_09048]
FOXG_07883	449.583	458.438	507.984	206.947	219.885	175.741	472.002	200.858	1.22886	1.22963e-17	conserved hypothetical protein [Source:BROAD_F_oxysporum;Acc:FOXG_07883]
FOXG_03906	117.015	127.834	118.005	21.4083	24.0629	28.7764	120.951	24.7492	2.29549	1.35215e-17	hypothetical protein similar to choline transport protein [Source:BROAD_F_oxysporum;Acc:FOXG_03906]
FOXG_07938	742.12	663.412	752.985	344.317	335.22	379.232	719.506	352.923	1.02937	1.38264e-17	hypothetical protein similar to aminotransferase [Source:BROAD_F_oxysporum;Acc:FOXG_07938]
FOXG_01680	9480.25	9658.05	10475.5	5328	5017.52	6079.01	9871.26	5474.84	0.850634	1.40437e-17	hypothetical protein similar to serine/threonine-protein kinase chk2 [Source:BROAD_F_oxysporum;Acc:FOXG_01680]
FOXG_08446	810.891	854.061	769.843	365.726	421.515	426.507	811.598	404.582	1.00491	1.5218e-17	conserved hypothetical protein [Source:BROAD_F_oxysporum;Acc:FOXG_08446]
FOXG_00292	643.581	659.004	756.357	1323.75	1244.63	1287.74	686.314	1285.37	-0.905706	1.5943e-17	hypothetical protein similar to dipeptidyl peptidase [Source:BROAD_F_oxysporum;Acc:FOXG_00292]
FOXG_13311	74.9305	74.9369	102.271	0.892014	1.65951	4.11091	84.0462	2.22081	5.29918	1.67879e-17	conserved hypothetical protein [Source:BROAD_F_oxysporum;Acc:FOXG_13311]
FOXG_15723	90.3272	89.2631	98.8996	12.4882	12.4463	15.4159	92.8299	13.4501	2.79463	1.81542e-17	predicted protein [Source:BROAD_F_oxysporum;Acc:FOXG_15723]
FOXG_13884	722.617	822.102	691.173	338.965	384.176	343.261	745.298	355.467	1.06695	1.83657e-17	conserved hypothetical protein [Source:BROAD_F_oxysporum;Acc:FOXG_13884]
FOXG_13870	159.099	169.71	146.102	34.7885	47.2959	29.8041	158.304	37.2962	2.075	1.84458e-17	predicted protein [Source:BROAD_F_oxysporum;Acc:FOXG_13870]
FOXG_13330	2302.32	2340.68	2432.03	3845.47	4842.44	4544.61	2358.34	4410.84	-0.90337	1.93693e-17	hypothetical protein [Source:BROAD_F_oxysporum;Acc:FOXG_13330]
FOXG_12110	78.0098	72.7329	93.2803	2.67604	4.14877	10.2773	81.341	5.7007	3.88109	1.96332e-17	conserved hypothetical protein [Source:BROAD_F_oxysporum;Acc:FOXG_12110]
FOXG_07677	7585.43	7395.62	8198.55	4427.06	4298.12	3524.08	7726.53	4083.09	0.919837	2.02341e-17	nucleoside diphosphate kinase [Source:BROAD_F_oxysporum;Acc:FOXG_07677]
FOXG_10295	1713.14	1788.57	1657.69	578.025	525.234	858.153	1719.8	653.804	1.39734	2.0331e-17	predicted protein [Source:BROAD_F_oxysporum;Acc:FOXG_10295]
FOXG_03469	3379.06	3002.99	2993.96	1634.17	1126.81	1089.39	3125.33	1283.46	1.28376	2.08618e-17	glycine dehydrogenase [Source:BROAD_F_oxysporum;Acc:FOXG_03469]
FOXG_07972	727.749	666.718	690.049	214.083	262.202	335.039	694.839	270.442	1.36459	2.12091e-17	multidrug resistance protein 1 [Source:BROAD_F_oxysporum;Acc:FOXG_07972]
FOXG_11197	580.968	589.577	634.98	305.069	300.371	270.292	601.842	291.911	1.0419	2.1554e-17	conserved hypothetical protein [Source:BROAD_F_oxysporum;Acc:FOXG_11197]
FOXG_08577	466.006	544.395	470.897	1126.61	980.769	943.454	493.766	1016.95	-1.04296	2.24299e-17	conserved hypothetical protein [Source:BROAD_F_oxysporum;Acc:FOXG_08577]
FOXG_00767	556.333	589.577	555.186	1065.06	995.704	1023.62	567.032	1028.13	-0.858528	2.36865e-17	maintenance of ploidy protein mob1 [Source:BROAD_F_oxysporum;Acc:FOXG_00767]
FOXG_01814	227.871	233.627	233.763	74.0371	58.0827	87.3569	231.753	73.1589	1.67139	2.52202e-17	hypothetical protein similar to erythromycin esterase family protein [Source:BROAD_F_oxysporum;Acc:FOXG_01814]
FOXG_03193	2021.07	1945.05	2013.95	1189.95	1168.29	1244.58	1993.36	1200.94	0.731558	2.55276e-17	conserved hypothetical protein [Source:BROAD_F_oxysporum;Acc:FOXG_03193]
FOXG_06396	2183.25	1983.63	2109.48	915.206	1124.32	1160.3	2092.12	1066.61	0.972402	2.55897e-17	nitrogen assimilation transcription factor nit-4 [Source:BROAD_F_oxysporum;Acc:FOXG_06396]
FOXG_11433	148.835	125.63	165.207	29.4364	38.1687	33.915	146.557	33.84	2.1124	2.76958e-17	predicted protein [Source:BROAD_F_oxysporum;Acc:FOXG_11433]
FOXG_01579	5016.24	4516.05	4530.27	1728.72	1850.35	2547.74	4687.52	2042.27	1.19933	2.78269e-17	conserved hypothetical protein [Source:BROAD_F_oxysporum;Acc:FOXG_01579]
FOXG_03165	4751.41	4894.04	4604.45	2648.39	2807.06	3034.88	4749.97	2830.11	0.747381	2.82505e-17	GATA transcription factor FNR1 [Source:UniProtKB/TrEMBL;Acc:Q27QB2]
FOXG_08892	68.7718	96.9772	84.2894	9.81215	7.46778	3.08318	83.3461	6.7877	3.58947	2.98559e-17	conserved hypothetical protein [Source:BROAD_F_oxysporum;Acc:FOXG_08892]
FOXG_14235	148.835	144.364	150.597	366.618	346.007	337.095	147.932	349.907	-1.24245	3.16561e-17	conserved hypothetical protein [Source:BROAD_F_oxysporum;Acc:FOXG_14235]
FOXG_01276	208.368	177.424	196.675	458.495	464.662	627.942	194.156	517.033	-1.41065	3.28698e-17	conserved hypothetical protein [Source:BROAD_F_oxysporum;Acc:FOXG_01276]
FOXG_03063	16810.1	16854.2	17472.6	9048.59	9330.58	10902.1	17045.6	9760.43	0.804518	3.29253e-17	conserved hypothetical protein [Source:BROAD_F_oxysporum;Acc:FOXG_03063]
FOXG_00600	4056.51	3859.25	4183	2396.84	2381.39	2583.71	4032.92	2453.98	0.717028	3.35623e-17	hypothetical protein similar to cystathionine gamma-synthase [Source:BROAD_F_oxysporum;Acc:FOXG_00600]
FOXG_12659	5742.96	5650.03	6335.19	3206.79	3165.51	3663.85	5909.39	3345.38	0.821133	3.40312e-17	hypothetical protein [Source:BROAD_F_oxysporum;Acc:FOXG_12659]
FOXG_08476	230.95	203.873	238.258	809.056	660.484	492.282	224.36	653.941	-1.54438	3.57364e-17	protein bys [Source:BROAD_F_oxysporum;Acc:FOXG_08476]
FOXG_09783	177.575	195.056	158.464	51.7368	48.9555	31.8596	177.032	44.1839	1.99281	3.8523e-17	conserved hypothetical protein [Source:BROAD_F_oxysporum;Acc:FOXG_09783]
FOXG_13830	225.818	179.628	184.313	683.282	642.229	436.784	196.586	587.432	-1.57954	3.99907e-17	hypothetical protein similar to small nucleolar ribonucleoprotein complex subunit [Source:BROAD_F_oxysporum;Acc:FOXG_13830]
FOXG_05251	253.532	220.403	203.418	727.883	648.867	484.06	225.784	620.27	-1.45816	4.81828e-17	conserved hypothetical protein [Source:BROAD_F_oxysporum;Acc:FOXG_05251]
FOXG_07661	991.546	1023.77	1068.79	440.655	511.128	334.012	1028.04	428.598	1.2593	4.96974e-17	conserved hypothetical protein [Source:BROAD_F_oxysporum;Acc:FOXG_07661]
FOXG_13743	1299.48	1137.28	1432.92	669.902	572.53	508.725	1289.89	583.719	1.14289	5.0654e-17	conserved hypothetical protein [Source:BROAD_F_oxysporum;Acc:FOXG_13743]
FOXG_02290	798.574	708.595	806.93	358.589	402.43	398.758	771.367	386.593	0.996892	5.08661e-17	hypothetical protein [Source:BROAD_F_oxysporum;Acc:FOXG_02290]
FOXG_00459	2596.91	2543.45	2746.71	1623.46	1627.98	1538.51	2629.02	1596.65	0.719069	5.17074e-17	conserved hypothetical protein [Source:BROAD_F_oxysporum;Acc:FOXG_00459]
FOXG_06184	5694.72	5363.5	5644.02	3577.87	3535.58	3616.57	5567.41	3576.67	0.638489	5.197e-17	predicted protein [Source:BROAD_F_oxysporum;Acc:FOXG_06184]
FOXG_08111	691.824	787.94	969.89	354.129	306.179	239.461	816.551	299.923	1.44246	5.52721e-17	predicted protein [Source:BROAD_F_oxysporum;Acc:FOXG_08111]
FOXG_02074	2461.41	2479.53	2423.04	1493.23	1399.79	1234.3	2454.66	1375.78	0.834575	5.54268e-17	hypothetical protein similar to cdc37 protein [Source:BROAD_F_oxysporum;Acc:FOXG_02074]
FOXG_08597	983.334	964.262	860.876	1829.52	1723.4	1598.12	936.157	1717.01	-0.875082	5.6498e-17	kinesin heavy chain [Source:BROAD_F_oxysporum;Acc:FOXG_08597]
FOXG_13919	644.607	563.129	537.204	1270.23	1087.81	1127.42	581.647	1161.82	-0.997408	5.7399e-17	hypothetical protein similar to spliceosome associated protein 145 [Source:BROAD_F_oxysporum;Acc:FOXG_13919]
FOXG_01419	1066.48	1164.83	1118.24	627.978	577.508	638.219	1116.51	614.568	0.862044	6.00712e-17	predicted protein [Source:BROAD_F_oxysporum;Acc:FOXG_01419]
FOXG_03564	131.385	155.384	105.643	27.6524	24.0629	27.7487	130.804	26.488	2.30766	6.16259e-17	predicted protein [Source:BROAD_F_oxysporum;Acc:FOXG_03564]
FOXG_08579	178.601	163.098	166.331	404.082	380.857	373.065	169.344	386.001	-1.18823	6.24575e-17	conserved hypothetical protein [Source:BROAD_F_oxysporum;Acc:FOXG_08579]
FOXG_05238	506.037	519.049	415.828	1066.85	936.792	966.064	480.305	989.901	-1.04274	6.27314e-17	conserved hypothetical protein [Source:BROAD_F_oxysporum;Acc:FOXG_05238]
FOXG_08883	111.882	110.201	106.767	18.7323	9.95704	23.6377	109.617	17.4424	2.6739	6.32026e-17	conserved hypothetical protein [Source:BROAD_F_oxysporum;Acc:FOXG_08883]
novel.343	28.7405	38.5705	24.7249	132.91	133.59	160.326	30.6786	142.275	-2.21161	6.52394e-17	PF13976:GAG-pre-integrase domain|PF14223:gag-polypeptide of LTR copia-type|PF00665:Integrase core domain|PF07727:Reverse transcriptase (RNA-dependent DNA polymerase)
FOXG_08762	5516.12	5365.71	5343.95	8892.48	8714.07	8085.14	5408.59	8563.9	-0.663089	6.56187e-17	hypothetical protein similar to mRNA binding post-transcriptional regulator [Source:BROAD_F_oxysporum;Acc:FOXG_08762]
FOXG_06274	482.429	500.314	445.048	898.258	888.666	865.347	475.93	884.09	-0.893391	6.9212e-17	conserved hypothetical protein [Source:BROAD_F_oxysporum;Acc:FOXG_06274]
FOXG_10991	1355.93	1344.46	1314.91	662.766	769.181	770.796	1338.44	734.248	0.866572	7.02573e-17	conserved hypothetical protein [Source:BROAD_F_oxysporum;Acc:FOXG_10991]
FOXG_01275	461.9	492.6	450.667	962.483	1281.14	1677.25	468.389	1306.96	-1.47978	7.15249e-17	hypothetical protein [Source:BROAD_F_oxysporum;Acc:FOXG_01275]
novel.390	46.19	26.4483	43.8305	206.055	161.802	155.187	38.8229	174.348	-2.1653	7.15498e-17	-
FOXG_07877	1344.64	1348.87	1511.59	2610.92	2797.1	3592.94	1401.7	3000.32	-1.09766	7.22081e-17	hypothetical protein similar to HAD superfamily hydrolase [Source:BROAD_F_oxysporum;Acc:FOXG_07877]
FOXG_07937	1332.33	1259.6	1260.97	732.343	698.652	599.165	1284.3	676.72	0.923132	7.31885e-17	Glutathione reductase [Source:UniProtKB/TrEMBL;Acc:E9RJT7]
FOXG_03194	85.1949	123.426	88.7848	286.336	399.111	300.097	99.1351	328.515	-1.73103	7.38798e-17	hexokinase-1 [Source:BROAD_F_oxysporum;Acc:FOXG_03194]
FOXG_13649	617.92	547.701	574.292	1131.97	1087.81	1015.4	579.971	1078.39	-0.894817	7.89245e-17	conserved hypothetical protein [Source:BROAD_F_oxysporum;Acc:FOXG_13649]
FOXG_05430	672.321	676.637	660.829	1264.88	1214.76	1121.25	669.929	1200.3	-0.841812	8.20908e-17	SWR1-complex protein 4 [Source:BROAD_F_oxysporum;Acc:FOXG_05430]
FOXG_04482	195.025	221.505	236.01	75.8212	73.8481	65.7746	217.513	71.8146	1.59498	8.51568e-17	conserved hypothetical protein [Source:BROAD_F_oxysporum;Acc:FOXG_04482]
FOXG_15669	648.713	595.088	588.902	1094.5	1085.32	1211.69	610.901	1130.5	-0.886785	8.93127e-17	conserved hypothetical protein [Source:BROAD_F_oxysporum;Acc:FOXG_15669]
FOXG_00285	123.173	96.9772	85.4133	439.763	355.134	272.348	101.855	355.748	-1.80335	8.94473e-17	conserved hypothetical protein [Source:BROAD_F_oxysporum;Acc:FOXG_00285]
FOXG_00836	567.624	513.538	538.328	1044.55	979.939	1208.61	539.83	1077.7	-0.996044	9.60966e-17	conserved hypothetical protein [Source:BROAD_F_oxysporum;Acc:FOXG_00836]
FOXG_06320	870.425	854.061	804.683	1516.42	1427.18	1675.2	843.056	1539.6	-0.867929	9.63849e-17	hypothetical protein [Source:BROAD_F_oxysporum;Acc:FOXG_06320]
FOXG_04428	744.173	636.964	768.719	210.515	243.118	338.122	716.619	263.918	1.44457	1.02341e-16	conserved hypothetical protein [Source:BROAD_F_oxysporum;Acc:FOXG_04428]
FOXG_01079	324.357	369.175	333.786	681.498	660.484	669.051	342.439	670.344	-0.969458	1.05788e-16	conserved hypothetical protein [Source:BROAD_F_oxysporum;Acc:FOXG_01079]
FOXG_10515	961.779	886.019	996.863	491.499	437.28	524.141	948.22	484.307	0.970964	1.06188e-16	histone H3.1 [Source:BROAD_F_oxysporum;Acc:FOXG_10515]
FOXG_00252	325.383	293.136	295.575	648.494	579.998	631.025	304.698	619.839	-1.02324	1.08925e-16	conserved hypothetical protein [Source:BROAD_F_oxysporum;Acc:FOXG_00252]
FOXG_06368	1389.81	1474.49	1463.26	849.197	857.135	774.907	1442.52	827.08	0.801435	1.09262e-16	hypothetical protein similar to transcription initiation factor iia small chain [Source:BROAD_F_oxysporum;Acc:FOXG_06368]
FOXG_11242	163.205	154.282	201.171	45.4927	44.8067	52.4141	172.886	47.5712	1.86496	1.10923e-16	conserved hypothetical protein [Source:BROAD_F_oxysporum;Acc:FOXG_11242]
FOXG_11429	2332.08	2490.55	2347.74	5112.13	4869.82	3909.48	2390.12	4630.48	-0.954373	1.151e-16	seryl-tRNA synthetase [Source:BROAD_F_oxysporum;Acc:FOXG_11429]
FOXG_10421	307.933	307.462	270.85	586.945	609.039	700.91	295.415	632.298	-1.09615	1.18613e-16	conserved hypothetical protein [Source:BROAD_F_oxysporum;Acc:FOXG_10421]
FOXG_13652	89.3007	120.12	102.271	9.81215	17.4248	19.5268	103.897	15.5879	2.74318	1.18748e-16	conserved hypothetical protein [Source:BROAD_F_oxysporum;Acc:FOXG_13652]
FOXG_13897	1896.87	1746.69	1824.02	857.225	970.812	1075	1822.53	967.68	0.914249	1.2158e-16	predicted protein [Source:BROAD_F_oxysporum;Acc:FOXG_13897]
FOXG_11285	744.173	571.945	587.778	1544.97	1453.73	1224.02	634.632	1407.57	-1.14895	1.24276e-16	conserved hypothetical protein [Source:BROAD_F_oxysporum;Acc:FOXG_11285]
FOXG_11119	169.363	160.894	158.464	35.6805	39.8282	54.4696	162.907	43.3261	1.92049	1.24579e-16	hypothetical protein [Source:BROAD_F_oxysporum;Acc:FOXG_11119]
FOXG_01425	10329.1	10469.1	10966.6	6393.06	6823.06	6963.88	10588.3	6726.67	0.65454	1.26367e-16	D-3-phosphoglycerate dehydrogenase 2 [Source:BROAD_F_oxysporum;Acc:FOXG_01425]
FOXG_12053	390.049	363.665	433.809	119.53	176.737	130.521	395.841	142.263	1.47256	1.32415e-16	conserved hypothetical protein [Source:BROAD_F_oxysporum;Acc:FOXG_12053]
FOXG_00850	2630.78	2835.48	2502.83	4408.33	4241.7	4411.01	2656.36	4353.68	-0.712693	1.34035e-16	conserved hypothetical protein [Source:BROAD_F_oxysporum;Acc:FOXG_00850]
FOXG_10547	3259.99	3260.86	3356.97	1673.42	1959.05	1998.93	3292.6	1877.13	0.810894	1.36873e-16	conserved hypothetical protein [Source:BROAD_F_oxysporum;Acc:FOXG_10547]
FOXG_11529	2466.55	2392.47	2463.5	4923.02	4619.24	3896.12	2440.84	4479.46	-0.876196	1.39001e-16	conserved hypothetical protein [Source:BROAD_F_oxysporum;Acc:FOXG_11529]
FOXG_03037	974.096	1000.63	913.697	531.64	517.766	548.807	962.807	532.738	0.85461	1.47082e-16	hypothetical protein similar to dienelactone hydrolase family protein [Source:BROAD_F_oxysporum;Acc:FOXG_03037]
FOXG_04939	146.782	136.65	185.437	18.7323	29.8711	42.1368	156.289	30.2468	2.38049	1.48996e-16	hypothetical protein similar to lipoprotein [Source:BROAD_F_oxysporum;Acc:FOXG_04939]
FOXG_02329	210.421	272.197	286.584	60.6569	87.9539	47.2755	256.401	65.2954	1.96311	1.52624e-16	hypothetical protein [Source:BROAD_F_oxysporum;Acc:FOXG_02329]
FOXG_01129	1416.49	1433.72	1511.59	856.333	842.2	879.735	1453.93	859.423	0.758762	1.54901e-16	conserved hypothetical protein [Source:BROAD_F_oxysporum;Acc:FOXG_01129]
FOXG_00823	1139.35	970.874	1028.33	2913.32	2503.37	1920.82	1046.19	2445.84	-1.22537	1.58603e-16	inosine-5'-monophosphate dehydrogenase IMD2 [Source:BROAD_F_oxysporum;Acc:FOXG_00823]
FOXG_04281	2506.58	2539.04	2488.22	3915.05	3845.08	4145.85	2511.28	3968.66	-0.660012	1.62936e-16	conserved hypothetical protein [Source:BROAD_F_oxysporum;Acc:FOXG_04281]
FOXG_10255	1886.61	1752.2	1861.11	997.271	1036.36	812.933	1833.31	948.855	0.948936	1.65768e-16	hypothetical protein similar to tRNA ligase [Source:BROAD_F_oxysporum;Acc:FOXG_10255]
FOXG_03170	823.209	894.835	938.422	495.068	445.578	434.729	885.489	458.458	0.948752	1.66599e-16	conserved hypothetical protein [Source:BROAD_F_oxysporum;Acc:FOXG_03170]
FOXG_10428	50564.7	49700.8	54134	16812.7	16220	26777.5	51466.5	19936.7	1.36828	1.70191e-16	Thiazole biosynthetic enzyme, mitochondrial [Source:UniProtKB/Swiss-Prot;Acc:P23618]
FOXG_10509	868.372	868.387	890.096	1756.37	1756.59	2503.55	875.618	2005.5	-1.19495	1.72668e-16	conserved hypothetical protein [Source:BROAD_F_oxysporum;Acc:FOXG_10509]
FOXG_00709	1367.22	1333.44	1296.93	2293.37	2117.53	2180.84	1332.53	2197.25	-0.721313	1.73334e-16	conserved hypothetical protein [Source:BROAD_F_oxysporum;Acc:FOXG_00709]
FOXG_13817	888.901	979.69	927.183	513.8	429.812	496.393	931.925	480.002	0.958099	1.76278e-16	hypothetical protein [Source:BROAD_F_oxysporum;Acc:FOXG_13817]
FOXG_05813	1848.63	1948.36	1808.29	1049.9	1101.91	1157.22	1868.43	1103.01	0.760833	1.77645e-16	conserved hypothetical protein [Source:BROAD_F_oxysporum;Acc:FOXG_05813]
FOXG_00235	674.374	733.941	587.778	1353.18	1351.67	1203.47	665.365	1302.77	-0.969613	1.80164e-16	conserved hypothetical protein [Source:BROAD_F_oxysporum;Acc:FOXG_00235]
FOXG_05206	787.283	696.473	704.659	1354.08	1351.67	1245.61	729.472	1317.12	-0.852356	1.81363e-16	conserved hypothetical protein [Source:BROAD_F_oxysporum;Acc:FOXG_05206]
FOXG_08097	797.548	800.062	805.807	1463.79	1364.11	1323.71	801.139	1383.87	-0.788902	1.84896e-16	hypothetical protein [Source:BROAD_F_oxysporum;Acc:FOXG_08097]
FOXG_13672	120.094	85.9571	84.2894	261.36	292.903	320.651	96.7802	291.638	-1.58704	1.85101e-16	conserved hypothetical protein [Source:BROAD_F_oxysporum;Acc:FOXG_13672]
FOXG_13928	32300.2	31254.2	30880.3	20718.8	21233.4	19609	31478.2	20520.4	0.617256	1.91316e-16	ATP synthase subunit beta, mitochondrial precursor [Source:BROAD_F_oxysporum;Acc:FOXG_13928]
FOXG_08555	7011.65	6238.5	6790.35	4152.32	3686.59	4061.58	6680.17	3966.83	0.75209	1.9596e-16	heat shock protein SSC1, mitochondrial precursor [Source:BROAD_F_oxysporum;Acc:FOXG_08555]
FOXG_05892	124.2	138.854	110.138	29.4364	19.9141	28.7764	124.397	26.0423	2.26422	1.97997e-16	protein RDR1 [Source:BROAD_F_oxysporum;Acc:FOXG_05892]
FOXG_08574	1085.98	910.264	913.697	2345.1	2043.68	1758.44	969.98	2049.08	-1.07892	2.01111e-16	hypothetical protein similar to CYT-19 DEAD-box protein precursor [Source:BROAD_F_oxysporum;Acc:FOXG_08574]
FOXG_00418	1549.93	1433.72	1679.04	603.001	729.353	838.626	1554.23	723.66	1.10382	2.04877e-16	conserved hypothetical protein [Source:BROAD_F_oxysporum;Acc:FOXG_00418]
FOXG_08324	439.318	436.398	421.447	1559.24	1370.75	855.07	432.388	1261.69	-1.54564	2.05443e-16	nonsense-mediated mRNA decay protein 3 [Source:BROAD_F_oxysporum;Acc:FOXG_08324]
FOXG_10803	44.1371	33.0604	23.601	265.82	175.078	139.771	33.5995	193.556	-2.52237	2.07329e-16	predicted protein [Source:BROAD_F_oxysporum;Acc:FOXG_10803]
FOXG_02436	3577.16	3607.99	3649.17	2253.23	2265.23	1987.63	3611.44	2168.69	0.735193	2.10074e-16	anthranilate synthase component 1 [Source:BROAD_F_oxysporum;Acc:FOXG_02436]
novel.518	177.575	182.934	179.817	59.7649	47.2959	59.6082	180.109	55.5564	1.70136	2.11609e-16	-
FOXG_03098	3705.47	3490.08	3087.24	5817.71	5771.77	6108.81	3427.59	5899.43	-0.783126	2.11712e-16	conserved hypothetical protein [Source:BROAD_F_oxysporum;Acc:FOXG_03098]
FOXG_00493	1084.95	1048.02	1092.39	2111.4	1945.77	1751.25	1075.12	1936.14	-0.849107	2.11841e-16	hypothetical protein similar to ran GTPase activating protein 1 [Source:BROAD_F_oxysporum;Acc:FOXG_00493]
FOXG_08106	1621.78	1625.47	1607.12	3147.02	2917.41	2575.49	1618.12	2879.97	-0.832071	2.13363e-16	hypothetical protein similar to eukaryotic translation initiation factor 3 subunit 9 [Source:BROAD_F_oxysporum;Acc:FOXG_08106]
FOXG_05408	3702.39	3691.75	3558.14	5551.89	5673.02	6045.1	3650.76	5756.67	-0.656852	2.17074e-16	conserved hypothetical protein [Source:BROAD_F_oxysporum;Acc:FOXG_05408]
FOXG_06187	5458.63	5065.96	4991.06	3139	2893.35	2513.82	5171.88	2848.72	0.860075	2.17988e-16	conserved hypothetical protein [Source:BROAD_F_oxysporum;Acc:FOXG_06187]
FOXG_08065	1599.2	1671.76	1625.1	3219.28	3031.92	2608.37	1632.02	2953.19	-0.85604	2.20666e-16	T-complex protein 1 subunit zeta [Source:BROAD_F_oxysporum;Acc:FOXG_08065]
FOXG_15676	538.884	497.008	616.998	243.52	268.84	234.322	550.963	248.894	1.14447	2.30196e-16	predicted protein [Source:BROAD_F_oxysporum;Acc:FOXG_15676]
FOXG_01202	2487.08	2649.24	2433.15	1257.74	1471.98	1497.4	2523.16	1409.04	0.84076	2.31037e-16	hypothetical protein similar to ser/Thr protein phosphatase family [Source:BROAD_F_oxysporum;Acc:FOXG_01202]
FOXG_13882	23664.7	24328.1	24797.9	13396.3	13129.2	15772.5	24263.6	14099.3	0.783263	2.38923e-16	conserved hypothetical protein [Source:BROAD_F_oxysporum;Acc:FOXG_13882]
FOXG_00827	7485.86	7221.5	7096.04	3975.7	4497.26	4614.5	7267.8	4362.49	0.73651	2.39817e-16	histidine biosynthesis trifunctional protein [Source:BROAD_F_oxysporum;Acc:FOXG_00827]
FOXG_03905	1237.89	1297.07	1241.86	470.983	562.573	686.522	1258.94	573.359	1.13631	2.4025e-16	hypothetical protein [Source:BROAD_F_oxysporum;Acc:FOXG_03905]
FOXG_04485	1270.74	1233.15	1241.86	713.611	723.545	613.554	1248.59	683.57	0.867737	2.58643e-16	high-affinity methionine permease [Source:BROAD_F_oxysporum;Acc:FOXG_04485]
FOXG_00814	969.99	999.527	896.839	547.696	506.979	500.503	955.452	518.393	0.881952	2.61707e-16	succinate semialdehyde dehydrogenase [Source:BROAD_F_oxysporum;Acc:FOXG_00814]
FOXG_07828	490.641	546.599	536.081	1146.24	1129.29	918.789	524.44	1064.77	-1.02305	2.81945e-16	pre-mRNA splicing factor prp45 [Source:BROAD_F_oxysporum;Acc:FOXG_07828]
FOXG_08238	134.464	153.18	115.757	577.133	452.216	326.817	134.467	452.055	-1.75027	2.92054e-16	hypothetical protein similar to flavodoxin and radical SAM domain protein [Source:BROAD_F_oxysporum;Acc:FOXG_08238]
FOXG_02247	42626.2	49331.7	47871.9	87951.6	86415.5	74102.3	46609.9	82823.1	-0.82942	2.97428e-16	hypothetical protein [Source:BROAD_F_oxysporum;Acc:FOXG_02247]
FOXG_03810	270.981	319.584	303.442	121.314	115.336	122.3	298.002	119.65	1.31682	2.97884e-16	conserved hypothetical protein [Source:BROAD_F_oxysporum;Acc:FOXG_03810]
FOXG_10577	262.77	218.199	220.276	542.344	487.065	502.559	233.748	510.656	-1.12588	3.09741e-16	conserved hypothetical protein [Source:BROAD_F_oxysporum;Acc:FOXG_10577]
FOXG_12147	478.323	418.765	485.507	198.919	204.949	145.937	460.865	183.268	1.32604	3.15592e-16	conserved hypothetical protein [Source:BROAD_F_oxysporum;Acc:FOXG_12147]
FOXG_03085	2062.13	2029.91	2010.58	1161.4	1114.36	894.123	2034.21	1056.63	0.943912	3.23716e-16	fumarate hydratase, mitochondrial precursor [Source:BROAD_F_oxysporum;Acc:FOXG_03085]
FOXG_01697	860.161	856.265	820.417	1581.54	1508.49	1377.16	845.614	1489.06	-0.816698	3.36722e-16	DNA replication licensing factor CDC47 [Source:BROAD_F_oxysporum;Acc:FOXG_01697]
FOXG_00874	327.436	321.788	289.956	654.738	586.636	680.356	313.06	640.577	-1.03133	3.56198e-16	conserved hypothetical protein [Source:BROAD_F_oxysporum;Acc:FOXG_00874]
FOXG_13566	569.677	549.905	537.204	1447.74	1198.99	1013.34	552.262	1220.02	-1.14394	3.61293e-16	glucoamylase precursor [Source:BROAD_F_oxysporum;Acc:FOXG_13566]
FOXG_15426	934.065	910.264	977.757	536.1	534.361	519.003	940.695	529.821	0.827739	3.63218e-16	conserved hypothetical protein [Source:BROAD_F_oxysporum;Acc:FOXG_15426]
FOXG_08614	848.87	796.756	823.788	1380.84	1419.71	1580.65	823.138	1460.4	-0.826379	3.77462e-16	conserved hypothetical protein [Source:BROAD_F_oxysporum;Acc:FOXG_08614]
FOXG_03583	1152.7	1078.87	1048.56	578.025	521.085	408.008	1093.38	502.373	1.12025	3.7792e-16	conserved hypothetical protein [Source:BROAD_F_oxysporum;Acc:FOXG_03583]
FOXG_01470	19968.5	20087.5	21253.3	8747.08	9190.35	12153.9	20436.4	10030.4	1.02689	3.854e-16	aspartokinase [Source:BROAD_F_oxysporum;Acc:FOXG_01470]
FOXG_05427	669.242	592.883	664.2	330.045	327.753	329.901	642.109	329.233	0.963979	3.88329e-16	voltage-gated potassium channel subunit beta-1 [Source:BROAD_F_oxysporum;Acc:FOXG_05427]
FOXG_01586	2436.78	2791.4	2723.11	1360.32	1442.94	1607.37	2650.43	1470.21	0.850612	3.99335e-16	hypothetical protein similar to fumarylacetoacetate hydrolase family protein [Source:BROAD_F_oxysporum;Acc:FOXG_01586]
FOXG_11947	4667.25	4716.62	4157.15	9872.81	9229.35	7434.58	4513.67	8845.58	-0.97074	4.19771e-16	hypothetical protein similar to extracellular cell wall glucanase Crf1/allergen Asp F9 [Source:BROAD_F_oxysporum;Acc:FOXG_11947]
FOXG_15623	3308.23	3258.66	3351.35	2122.1	2068.58	1884.85	3306.08	2025.18	0.706606	4.2072e-16	NADH-ubiquinone oxidoreductase 21 kDa subunit [Source:BROAD_F_oxysporum;Acc:FOXG_15623]
FOXG_15483	153.967	122.324	122.501	375.538	357.624	306.263	132.93	346.475	-1.38132	4.30155e-16	diphthamide biosynthesis protein 2 [Source:BROAD_F_oxysporum;Acc:FOXG_15483]
FOXG_03653	427.001	482.682	465.277	911.638	825.605	1013.34	458.32	916.861	-0.999799	4.35613e-16	phosphoglycerate mutase [Source:BROAD_F_oxysporum;Acc:FOXG_03653]
FOXG_00068	3717.78	3452.61	3623.32	2044.5	2227.06	2290.81	3597.9	2187.45	0.718164	4.40287e-16	conserved hypothetical protein [Source:BROAD_F_oxysporum;Acc:FOXG_00068]
novel.632	82.1156	72.7329	89.9087	2.67604	0.829753	1.02773	81.5857	1.51117	5.75035	4.58992e-16	-
FOXG_01944	1634.1	1732.37	1631.84	3271.01	3065.11	2657.7	1666.1	2997.94	-0.847881	4.65147e-16	histidyl-tRNA synthetase, mitochondrial precursor [Source:BROAD_F_oxysporum;Acc:FOXG_01944]
FOXG_07755	196.051	190.648	160.712	528.964	540.17	383.343	182.47	484.159	-1.40868	5.37478e-16	conserved hypothetical protein [Source:BROAD_F_oxysporum;Acc:FOXG_07755]
FOXG_04449	185.787	142.16	166.331	39.2486	51.4447	43.1646	164.759	44.6193	1.88214	5.37957e-16	conserved hypothetical protein [Source:BROAD_F_oxysporum;Acc:FOXG_04449]
FOXG_10041	603.55	541.089	504.613	1130.18	1215.59	1690.61	549.75	1345.46	-1.29	5.39935e-16	conserved hypothetical protein [Source:BROAD_F_oxysporum;Acc:FOXG_10041]
FOXG_11289	162417	141657	144188	254951	270840	331101	149421	285631	-0.934763	5.57939e-16	plasma membrane ATPase [Source:BROAD_F_oxysporum;Acc:FOXG_11289]
FOXG_00085	612.788	638.066	591.15	1097.18	1078.68	1041.09	614.001	1072.31	-0.804636	5.77406e-16	pre-mRNA-splicing factor clf-1 [Source:BROAD_F_oxysporum;Acc:FOXG_00085]
FOXG_14145	243.267	276.605	255.116	549.48	549.297	498.448	258.33	532.408	-1.04479	5.97206e-16	conserved hypothetical protein [Source:BROAD_F_oxysporum;Acc:FOXG_14145]
FOXG_10897	470.112	510.232	492.25	897.366	978.279	1174.69	490.865	1016.78	-1.0499	6.0974e-16	hypothetical protein [Source:BROAD_F_oxysporum;Acc:FOXG_10897]
FOXG_11299	5062.43	5341.46	5664.25	3124.72	2904.14	3392.53	5356.05	3140.46	0.770477	6.30902e-16	hypothetical protein [Source:BROAD_F_oxysporum;Acc:FOXG_11299]
FOXG_06430	202.21	214.893	160.712	443.331	428.983	485.088	192.605	452.467	-1.23026	6.84755e-16	hypothetical protein [Source:BROAD_F_oxysporum;Acc:FOXG_06430]
FOXG_13371	308.96	307.462	275.345	53.5208	70.529	114.078	297.256	79.3759	1.91407	6.93447e-16	siderophore iron transporter mirB [Source:BROAD_F_oxysporum;Acc:FOXG_13371]
FOXG_09057	1700.82	1796.28	1743.1	660.09	680.398	970.175	1746.74	770.221	1.18296	7.0382e-16	conserved hypothetical protein [Source:BROAD_F_oxysporum;Acc:FOXG_09057]
FOXG_05224	332.568	368.073	359.635	700.231	665.462	817.044	353.425	727.579	-1.04091	7.20595e-16	conserved hypothetical protein [Source:BROAD_F_oxysporum;Acc:FOXG_05224]
FOXG_01588	319.224	276.605	255.116	630.654	604.061	563.195	283.649	599.303	-1.07835	7.24855e-16	conserved hypothetical protein [Source:BROAD_F_oxysporum;Acc:FOXG_01588]
FOXG_02861	2198.65	2326.35	2192.65	3581.43	3426.88	3537.44	2239.21	3515.25	-0.650604	7.32579e-16	hypothetical protein similar to pim1 protein [Source:BROAD_F_oxysporum;Acc:FOXG_02861]
FOXG_04951	118.041	96.9772	137.111	24.9764	24.0629	13.3605	117.376	20.7999	2.48116	7.35845e-16	conserved hypothetical protein [Source:BROAD_F_oxysporum;Acc:FOXG_04951]
FOXG_03588	2934.61	3097.76	3267.06	1461.12	1703.48	1852.99	3099.81	1672.53	0.890486	7.4811e-16	ubiquinone biosynthesis protein COQ4, mitochondrial precursor [Source:BROAD_F_oxysporum;Acc:FOXG_03588]
FOXG_03022	384.917	390.113	401.218	146.29	126.123	188.074	392.082	153.496	1.35872	7.56377e-16	conserved hypothetical protein [Source:BROAD_F_oxysporum;Acc:FOXG_03022]
FOXG_06238	375.679	343.828	438.305	135.586	144.377	175.741	385.937	151.902	1.34839	7.63828e-16	predicted protein [Source:BROAD_F_oxysporum;Acc:FOXG_06238]
FOXG_11310	110.856	125.63	111.262	280.984	284.605	289.819	115.916	285.136	-1.2988	7.85595e-16	conserved hypothetical protein [Source:BROAD_F_oxysporum;Acc:FOXG_11310]
FOXG_08456	1768.56	1734.57	1623.98	3482.42	3329.8	2750.2	1709.04	3187.47	-0.899481	7.86769e-16	T-complex protein 1 subunit alpha [Source:BROAD_F_oxysporum;Acc:FOXG_08456]
FOXG_09678	91.3536	65.0188	74.1747	4.46007	0	8.22182	76.849	4.2273	4.25974	7.88905e-16	conserved hypothetical protein [Source:BROAD_F_oxysporum;Acc:FOXG_09678]
FOXG_08616	53.3751	41.8765	46.0782	189.107	178.397	145.937	47.11	171.147	-1.86094	7.91218e-16	predicted protein [Source:BROAD_F_oxysporum;Acc:FOXG_08616]
FOXG_09811	55420.8	54504.5	57044.8	20040	23086.2	31362.1	55656.7	24829.5	1.16455	8.0029e-16	hypothetical protein similar to MFS peptide transporter [Source:BROAD_F_oxysporum;Acc:FOXG_09811]
FOXG_03434	168.337	174.118	137.111	529.856	417.366	366.899	159.855	438.04	-1.45445	8.53373e-16	conserved hypothetical protein [Source:BROAD_F_oxysporum;Acc:FOXG_03434]
FOXG_02286	2456.28	2305.41	2417.42	1508.39	1519.28	1481.98	2393.04	1503.22	0.670699	8.77572e-16	hypothetical protein similar to aspartyl aminopeptidase [Source:BROAD_F_oxysporum;Acc:FOXG_02286]
FOXG_03555	4020.58	4296.75	4313.37	2682.28	2387.2	2227.09	4210.24	2432.19	0.791292	8.88083e-16	hypothetical protein similar to secreted aspartic proteinase [Source:BROAD_F_oxysporum;Acc:FOXG_03555]
FOXG_04209	343.859	318.482	325.919	148.966	131.101	146.965	329.42	142.344	1.21266	9.07782e-16	hypothetical protein similar to carnitine acetyl transferase [Source:BROAD_F_oxysporum;Acc:FOXG_04209]
FOXG_16412	126.253	120.12	88.7848	309.529	280.457	334.012	111.719	307.999	-1.45948	9.5591e-16	conserved hypothetical protein [Source:BROAD_F_oxysporum;Acc:FOXG_16412]
FOXG_05365	2119.61	2053.05	1985.86	3353.97	3190.4	3185.96	2052.84	3243.44	-0.659799	9.69769e-16	FACT complex subunit SPT16 [Source:BROAD_F_oxysporum;Acc:FOXG_05365]
FOXG_04397	705.168	692.065	713.65	397.838	358.453	331.956	703.628	362.749	0.954527	9.80851e-16	ATP-dependent Clp protease proteolytic subunit [Source:BROAD_F_oxysporum;Acc:FOXG_04397]
FOXG_02490	191.945	167.506	139.358	421.922	372.559	448.089	166.27	414.19	-1.31354	9.83732e-16	hypothetical protein [Source:BROAD_F_oxysporum;Acc:FOXG_02490]
FOXG_03830	361.309	305.258	305.69	56.1969	43.1472	112.022	324.085	70.4555	2.21383	1.00476e-15	conserved hypothetical protein [Source:BROAD_F_oxysporum;Acc:FOXG_03830]
FOXG_10529	3197.38	3314.86	2981.6	5171.89	5090.54	4876.57	3164.61	5046.33	-0.673245	1.00943e-15	transcriptional repressor rco-1 [Source:BROAD_F_oxysporum;Acc:FOXG_10529]
FOXG_08221	3395.48	3434.98	3630.06	2217.55	2169.81	2274.36	3486.84	2220.57	0.651117	1.06742e-15	conserved hypothetical protein [Source:BROAD_F_oxysporum;Acc:FOXG_08221]
FOXG_09239	56.4545	67.2229	34.8396	194.459	209.928	321.679	52.839	242.022	-2.19132	1.06833e-15	conserved hypothetical protein [Source:BROAD_F_oxysporum;Acc:FOXG_09239]
FOXG_17461	587.126	562.027	512.48	1016.9	1088.64	967.092	553.878	1024.21	-0.886944	1.08711e-15	conserved hypothetical protein [Source:BROAD_F_oxysporum;Acc:FOXG_17461]
FOXG_03237	61.5867	58.4067	64.0599	280.092	209.098	175.741	61.3511	221.644	-1.85483	1.19955e-15	hypothetical protein similar to WD repeat protein [Source:BROAD_F_oxysporum;Acc:FOXG_03237]
FOXG_05005	378.758	390.113	414.704	189.999	184.205	175.741	394.525	183.315	1.10438	1.21637e-15	conserved hypothetical protein [Source:BROAD_F_oxysporum;Acc:FOXG_05005]
FOXG_08971	225.818	224.811	302.318	93.6614	67.21	62.6914	250.982	74.521	1.74867	1.23595e-15	hypothetical protein similar to aminotransferase [Source:BROAD_F_oxysporum;Acc:FOXG_08971]
FOXG_01111	18269.7	18645	19817	29151	29071.2	27991.2	18910.6	28737.8	-0.603798	1.24542e-15	peptidyl-prolyl cis-trans isomerase, mitochondrial precursor [Source:BROAD_F_oxysporum;Acc:FOXG_01111]
FOXG_00093	368.494	357.053	334.91	691.311	726.864	638.219	353.485	685.465	-0.955869	1.25233e-15	conserved hypothetical protein [Source:BROAD_F_oxysporum;Acc:FOXG_00093]
FOXG_02046	610.735	743.859	651.838	1255.06	1283.63	1182.91	668.811	1240.54	-0.892139	1.285e-15	DNA replication licensing factor mcm5 [Source:BROAD_F_oxysporum;Acc:FOXG_02046]
FOXG_14497	37383.1	34717.8	34714.9	55594.7	52491.9	55222.9	35605.3	54436.5	-0.612461	1.30612e-15	conserved hypothetical protein [Source:BROAD_F_oxysporum;Acc:FOXG_14497]
FOXG_01698	810.891	785.736	787.825	432.627	399.111	324.762	794.817	385.5	1.04172	1.41561e-15	hypothetical protein similar to peroxisome biosynthesis protein PAS1/Peroxin-1 [Source:BROAD_F_oxysporum;Acc:FOXG_01698]
novel.98	506.037	536.681	574.292	243.52	282.116	260.015	539.003	261.884	1.04006	1.41953e-15	-
FOXG_00497	1487.32	1518.58	1414.94	3418.2	2997.9	2460.38	1473.61	2958.83	-1.00597	1.52829e-15	T-complex protein 1 subunit delta [Source:BROAD_F_oxysporum;Acc:FOXG_00497]
FOXG_00276	226.844	208.281	289.956	72.2531	40.6579	24.6655	241.693	45.8588	2.38987	1.53332e-15	hypothetical protein [Source:BROAD_F_oxysporum;Acc:FOXG_00276]
FOXG_03108	1146.54	1133.97	1137.34	676.146	667.952	590.944	1139.29	645.014	0.819482	1.56428e-15	hypothetical protein similar to auxin Efflux Carrier superfamily [Source:BROAD_F_oxysporum;Acc:FOXG_03108]
FOXG_05174	99.5652	98.0792	103.395	305.961	272.989	235.35	100.346	271.433	-1.43745	1.59439e-15	conserved hypothetical protein [Source:BROAD_F_oxysporum;Acc:FOXG_05174]
FOXG_09163	80.0627	96.9772	66.3077	12.4882	8.29753	8.22182	81.1159	9.66918	3.06556	1.62119e-15	conserved hypothetical protein [Source:BROAD_F_oxysporum;Acc:FOXG_09163]
FOXG_13755	1765.49	1559.35	1768.95	659.198	677.079	944.482	1697.93	760.253	1.16087	1.63384e-15	hypothetical protein similar to clock-controlled gene-9 protein [Source:BROAD_F_oxysporum;Acc:FOXG_13755]
FOXG_07642	91.3536	90.3651	97.7757	15.1642	19.9141	11.305	93.1648	15.4611	2.57428	1.65541e-15	conserved hypothetical protein [Source:BROAD_F_oxysporum;Acc:FOXG_07642]
FOXG_13777	69.7983	58.4067	77.5462	2.67604	4.14877	0	68.5837	2.27494	4.83507	1.66653e-15	predicted protein [Source:BROAD_F_oxysporum;Acc:FOXG_13777]
FOXG_08884	209.395	168.608	197.799	65.117	44.8067	61.6637	191.934	57.1958	1.75228	1.70283e-15	conserved hypothetical protein [Source:BROAD_F_oxysporum;Acc:FOXG_08884]
FOXG_02370	2643.1	2455.29	2519.69	1381.73	1510.15	1607.37	2539.36	1499.75	0.760282	1.71003e-15	sulfur metabolite repression control protein [Source:BROAD_F_oxysporum;Acc:FOXG_02370]
FOXG_02038	1197.86	1128.46	986.748	2019.52	1902.62	2224	1104.36	2048.72	-0.890674	1.74411e-15	hypothetical protein [Source:BROAD_F_oxysporum;Acc:FOXG_02038]
FOXG_17029	213.501	211.587	212.409	20.5163	28.2116	64.7469	212.499	37.8249	2.50761	1.77579e-15	conserved hypothetical protein [Source:BROAD_F_oxysporum;Acc:FOXG_17029]
FOXG_02017	895.06	899.243	809.178	1584.22	1526.75	1422.38	867.827	1511.11	-0.800242	1.80088e-15	conserved hypothetical protein [Source:BROAD_F_oxysporum;Acc:FOXG_02017]
FOXG_03719	166.284	145.466	140.482	356.805	328.582	366.899	150.744	350.762	-1.21588	1.88463e-15	conserved hypothetical protein [Source:BROAD_F_oxysporum;Acc:FOXG_03719]
FOXG_00030	11912.9	11146.9	10314.8	19378.1	17603.2	17843.4	11124.9	18274.9	-0.716031	1.89617e-15	conserved hypothetical protein [Source:BROAD_F_oxysporum;Acc:FOXG_00030]
FOXG_02756	1101.38	1236.46	1109.25	1989.19	2159.85	1883.83	1149.03	2010.95	-0.808034	1.92509e-15	predicted protein [Source:BROAD_F_oxysporum;Acc:FOXG_02756]
novel.571	875.558	824.306	802.435	180.187	246.437	373.065	834.1	266.563	1.64913	1.93005e-15	PF07690:Major Facilitator Superfamily
FOXG_04525	64.666	67.2229	79.794	0.892014	1.65951	8.22182	70.5609	3.59111	4.37939	2.05559e-15	conserved hypothetical protein [Source:BROAD_F_oxysporum;Acc:FOXG_04525]
FOXG_05025	327.436	416.561	296.699	142.722	121.974	120.244	346.899	128.313	1.43402	2.13371e-15	conserved hypothetical protein [Source:BROAD_F_oxysporum;Acc:FOXG_05025]
FOXG_04756	323.33	349.338	350.644	139.154	160.142	151.076	341.104	150.124	1.18297	2.1788e-15	conserved hypothetical protein [Source:BROAD_F_oxysporum;Acc:FOXG_04756]
FOXG_04094	407.499	368.073	397.846	175.727	161.802	116.133	391.139	151.221	1.36637	2.25068e-15	conserved hypothetical protein [Source:BROAD_F_oxysporum;Acc:FOXG_04094]
FOXG_10448	239.162	188.444	236.01	62.4409	58.0827	85.3014	221.205	68.6084	1.69722	2.26017e-15	conserved hypothetical protein [Source:BROAD_F_oxysporum;Acc:FOXG_10448]
FOXG_15337	1173.23	1223.24	1176.68	182.863	158.483	68.8578	1191.05	136.734	3.12042	2.26106e-15	conserved hypothetical protein [Source:BROAD_F_oxysporum;Acc:FOXG_15337]
FOXG_03294	2937.69	2742.91	2744.46	1613.65	1738.33	1798.52	2808.35	1716.84	0.710359	2.28594e-15	conserved hypothetical protein [Source:BROAD_F_oxysporum;Acc:FOXG_03294]
novel.719	103.671	107.997	112.386	0.892014	0.829753	1.02773	108.018	0.916498	6.89153	2.37725e-15	PF00172:Fungal Zn(2)-Cys(6) binuclear cluster domain
FOXG_03401	3605.9	3937.5	3809.88	6123.67	5725.3	5899.16	3784.43	5916.04	-0.644628	2.49333e-15	hypothetical protein similar to oxysterol binding protein [Source:BROAD_F_oxysporum;Acc:FOXG_03401]
FOXG_17466	222.739	177.424	192.18	35.6805	68.0398	49.3309	197.448	51.0171	1.9482	2.66343e-15	conserved hypothetical protein [Source:BROAD_F_oxysporum;Acc:FOXG_17466]
FOXG_12352	19679	19966.3	22542.4	8492.86	9060.08	12129.2	20729.2	9894.06	1.06715	2.89083e-15	conserved hypothetical protein [Source:BROAD_F_oxysporum;Acc:FOXG_12352]
FOXG_03092	307.933	357.053	312.433	643.142	610.699	701.938	325.806	651.926	-1.00009	3.2093e-15	conserved hypothetical protein [Source:BROAD_F_oxysporum;Acc:FOXG_03092]
FOXG_08489	374.652	451.826	367.502	741.263	828.924	896.179	397.993	822.122	-1.04629	3.49914e-15	conserved hypothetical protein [Source:BROAD_F_oxysporum;Acc:FOXG_08489]
novel.118	87.2478	96.9772	124.748	20.5163	17.4248	19.5268	102.991	19.156	2.42759	3.52982e-15	-
FOXG_14219	180.654	167.506	123.624	464.739	400.771	369.982	157.262	411.831	-1.38761	3.55372e-15	conserved hypothetical protein [Source:BROAD_F_oxysporum;Acc:FOXG_14219]
FOXG_04415	279.193	301.952	279.841	94.5534	105.379	131.549	286.995	110.494	1.38194	3.60841e-15	hypothetical protein [Source:BROAD_F_oxysporum;Acc:FOXG_04415]
FOXG_12796	1206.07	1168.13	1182.3	627.086	679.568	727.631	1185.5	678.095	0.806889	3.72535e-15	conserved hypothetical protein [Source:BROAD_F_oxysporum;Acc:FOXG_12796]
FOXG_03457	1655.66	1588	1725.12	873.281	1013.96	977.369	1656.26	954.87	0.794465	3.83058e-15	conserved hypothetical protein [Source:BROAD_F_oxysporum;Acc:FOXG_03457]
FOXG_10600	301.775	276.605	275.345	801.028	690.355	542.64	284.575	678.008	-1.2532	3.88541e-15	hypothetical protein similar to DRAP deaminase Rib2 [Source:BROAD_F_oxysporum;Acc:FOXG_10600]
FOXG_10590	618.946	634.76	558.558	1382.62	1186.55	1061.64	604.088	1210.27	-1.00281	3.90453e-15	DNA replication licensing factor mcm2 [Source:BROAD_F_oxysporum;Acc:FOXG_10590]
FOXG_11513	1783.96	2016.69	1902.69	1140.89	1152.53	1155.17	1901.11	1149.53	0.725641	3.97493e-15	hypothetical protein similar to copper chaperone for SOD [Source:BROAD_F_oxysporum;Acc:FOXG_11513]
FOXG_02779	700.035	726.227	686.678	391.594	374.219	395.675	704.313	387.163	0.863973	3.99396e-15	conserved hypothetical protein [Source:BROAD_F_oxysporum;Acc:FOXG_02779]
FOXG_03405	1225.58	1324.62	1153.08	2270.17	1990.58	2343.22	1234.42	2201.32	-0.834084	4.02148e-15	hypothetical protein [Source:BROAD_F_oxysporum;Acc:FOXG_03405]
FOXG_08522	709.273	697.575	703.535	355.021	399.941	387.453	703.461	380.805	0.885347	4.30161e-15	conserved hypothetical protein [Source:BROAD_F_oxysporum;Acc:FOXG_08522]
FOXG_03639	209.395	287.626	224.772	82.0652	83.8051	58.5805	240.597	74.8169	1.67831	4.38167e-15	IMP-specific 5'-nucleotidase 1 [Source:BROAD_F_oxysporum;Acc:FOXG_03639]
FOXG_10341	440.345	397.827	448.42	192.675	192.503	218.906	428.864	201.361	1.09311	4.51695e-15	conserved hypothetical protein [Source:BROAD_F_oxysporum;Acc:FOXG_10341]
FOXG_00082	273.034	220.403	187.684	752.859	696.993	486.115	227.041	645.323	-1.50678	4.53162e-15	conserved hypothetical protein [Source:BROAD_F_oxysporum;Acc:FOXG_00082]
FOXG_01008	726.723	754.88	709.155	422.814	362.602	356.622	730.252	380.679	0.93921	4.67046e-15	folylpolyglutamate synthase [Source:BROAD_F_oxysporum;Acc:FOXG_01008]
FOXG_04928	221.712	219.301	221.4	79.3892	82.9753	90.4401	220.804	84.2682	1.39208	4.81526e-15	conserved hypothetical protein [Source:BROAD_F_oxysporum;Acc:FOXG_04928]
FOXG_03522	673.348	640.27	664.2	361.265	355.964	305.235	659.273	340.822	0.949854	5.04155e-15	conserved hypothetical protein [Source:BROAD_F_oxysporum;Acc:FOXG_03522]
FOXG_08485	1616.65	1507.56	1580.15	963.375	906.921	976.342	1568.12	948.879	0.725383	5.05459e-15	mitochondrial carrier protein LEU5 [Source:BROAD_F_oxysporum;Acc:FOXG_08485]
FOXG_02396	85.1949	95.8752	76.4224	220.327	231.501	245.627	85.8308	232.485	-1.43642	5.15517e-15	predicted protein [Source:BROAD_F_oxysporum;Acc:FOXG_02396]
FOXG_11130	130.359	126.732	150.597	33.0045	39.8282	36.9982	135.896	36.6103	1.89046	5.29548e-15	hypothetical protein [Source:BROAD_F_oxysporum;Acc:FOXG_11130]
FOXG_11468	334.621	303.054	287.708	665.442	659.654	564.223	308.461	629.773	-1.02996	5.38552e-15	conserved hypothetical protein [Source:BROAD_F_oxysporum;Acc:FOXG_11468]
FOXG_09036	362.335	379.093	386.607	694.879	679.568	681.384	376.012	685.277	-0.866379	5.45797e-15	hypothetical protein similar to ATP binding / thymidylate kinase [Source:BROAD_F_oxysporum;Acc:FOXG_09036]
FOXG_12803	2702.63	2483.94	2781.55	4256.69	4226.76	4768.66	2656.04	4417.37	-0.733669	6.3431e-15	conserved hypothetical protein [Source:BROAD_F_oxysporum;Acc:FOXG_12803]
FOXG_10615	176.549	179.628	180.941	399.622	384.176	361.76	179.039	381.853	-1.09371	6.36057e-15	mitotic spindle checkpoint component mad2 [Source:BROAD_F_oxysporum;Acc:FOXG_10615]
novel.190	963.832	933.406	1055.3	541.452	550.127	573.472	984.18	555.017	0.826711	6.37476e-15	-
FOXG_10335	15022	15182.4	15536.2	9742.57	10136.3	10577.4	15246.9	10152.1	0.586796	6.46579e-15	cytochrome c oxidase polypeptide IV, mitochondrial precursor [Source:BROAD_F_oxysporum;Acc:FOXG_10335]
FOXG_13880	274.061	327.298	350.644	120.422	96.2514	59.6082	317.334	92.0938	1.77795	6.65853e-15	predicted protein [Source:BROAD_F_oxysporum;Acc:FOXG_13880]
FOXG_06408	437.266	382.399	373.121	743.939	755.905	733.798	397.595	744.547	-0.904242	7.40495e-15	conserved hypothetical protein [Source:BROAD_F_oxysporum;Acc:FOXG_06408]
FOXG_11503	4804.79	4995.43	4966.33	7607.98	7251.22	8111.86	4922.18	7657.02	-0.637376	7.46892e-15	conserved hypothetical protein [Source:BROAD_F_oxysporum;Acc:FOXG_11503]
FOXG_09261	4755.52	4934.82	5360.81	2596.65	2457.73	3136.63	5017.05	2730.34	0.878205	7.54377e-15	conserved hypothetical protein [Source:BROAD_F_oxysporum;Acc:FOXG_09261]
FOXG_00165	1169.12	1183.56	1229.5	656.522	635.591	742.02	1194.06	678.044	0.817747	7.58149e-15	conserved hypothetical protein [Source:BROAD_F_oxysporum;Acc:FOXG_00165]
FOXG_03535	117.015	134.446	111.262	305.069	277.967	292.902	120.907	291.979	-1.27175	7.65477e-15	conserved hypothetical protein [Source:BROAD_F_oxysporum;Acc:FOXG_03535]
FOXG_05426	2142.19	2191.91	2459	1253.28	1228.86	1407.99	2264.37	1296.71	0.804787	7.66568e-15	conserved hypothetical protein [Source:BROAD_F_oxysporum;Acc:FOXG_05426]
FOXG_07862	307.933	249.055	256.24	110.61	107.868	99.6896	271.076	106.056	1.35324	7.76249e-15	conserved hypothetical protein [Source:BROAD_F_oxysporum;Acc:FOXG_07862]
FOXG_08396	989.493	1149.4	1072.16	2041.82	1735.84	2017.43	1070.35	1931.7	-0.851709	8.23618e-15	hypothetical protein [Source:BROAD_F_oxysporum;Acc:FOXG_08396]
FOXG_01985	9378.63	8078.86	8014.24	18840.2	17725.2	13840.4	8490.58	16801.9	-0.984717	8.27731e-15	ATP-dependent RNA helicase eIF4A [Source:BROAD_F_oxysporum;Acc:FOXG_01985]
FOXG_03219	2460.39	2196.31	2297.17	1096.28	1263.71	1404.9	2317.96	1254.97	0.885942	8.55999e-15	conserved hypothetical protein [Source:BROAD_F_oxysporum;Acc:FOXG_03219]
FOXG_05308	370.547	343.828	316.928	644.034	661.314	763.602	343.768	689.65	-1.00254	8.74677e-15	hypothetical protein similar to cell division control protein 14 [Source:BROAD_F_oxysporum;Acc:FOXG_05308]
FOXG_10097	177.575	120.12	134.863	388.918	336.88	423.424	144.186	383.074	-1.40598	8.91083e-15	conserved hypothetical protein [Source:BROAD_F_oxysporum;Acc:FOXG_10097]
FOXG_02424	10465.6	10589.3	11206	5369.03	6290.36	6787.12	10753.6	6148.84	0.806547	9.08263e-15	N amino acid transport system protein [Source:BROAD_F_oxysporum;Acc:FOXG_02424]
FOXG_05924	3778.34	3741.34	3796.39	2299.61	2350.69	2558.01	3772.03	2402.77	0.651032	9.25337e-15	conserved hypothetical protein [Source:BROAD_F_oxysporum;Acc:FOXG_05924]
novel.570	31.8198	30.8564	35.9635	132.91	114.506	155.187	32.8799	134.201	-2.02718	9.79933e-15	PF04082:Fungal specific transcription factor domain|PF00172:Fungal Zn(2)-Cys(6) binuclear cluster domain
FOXG_08599	1066.48	1052.42	1119.36	487.931	347.667	228.156	1079.42	354.585	1.60404	9.94331e-15	acetyl-CoA acetyltransferase [Source:BROAD_F_oxysporum;Acc:FOXG_08599]
FOXG_05333	704.141	657.902	646.219	1150.7	1183.23	1099.67	669.421	1144.53	-0.773786	1.02698e-14	conserved hypothetical protein [Source:BROAD_F_oxysporum;Acc:FOXG_05333]
FOXG_07097	71.8511	85.9571	79.794	5.35208	10.7868	14.3882	79.2007	10.1757	2.97589	1.03408e-14	predicted protein [Source:BROAD_F_oxysporum;Acc:FOXG_07097]
FOXG_03501	6755.03	6646.25	7278.11	4403.87	4463.24	4596	6893.13	4487.7	0.619223	1.05343e-14	hypothetical protein [Source:BROAD_F_oxysporum;Acc:FOXG_03501]
FOXG_03330	1465.76	1525.19	1553.17	902.718	940.94	951.676	1514.71	931.778	0.701006	1.14801e-14	conserved hypothetical protein [Source:BROAD_F_oxysporum;Acc:FOXG_03330]
FOXG_16469	1898.92	1645.31	1846.5	913.422	1091.13	885.901	1796.91	963.483	0.898332	1.35057e-14	conserved hypothetical protein [Source:BROAD_F_oxysporum;Acc:FOXG_16469]
FOXG_13419	174.496	215.995	180.941	524.504	514.447	381.287	190.477	473.413	-1.31574	1.37921e-14	conserved hypothetical protein [Source:BROAD_F_oxysporum;Acc:FOXG_13419]
FOXG_17127	251.479	284.32	277.593	102.582	105.379	123.327	271.131	110.429	1.2988	1.41077e-14	conserved hypothetical protein [Source:BROAD_F_oxysporum;Acc:FOXG_17127]
FOXG_03042	762.649	757.084	691.173	1277.36	1267.03	1203.47	736.968	1249.29	-0.761416	1.41742e-14	conserved hypothetical protein [Source:BROAD_F_oxysporum;Acc:FOXG_03042]
FOXG_04166	2078.55	1939.54	1636.34	3286.18	3291.63	3456.25	1884.81	3344.69	-0.827034	1.46398e-14	cytochrome P450 61 [Source:BROAD_F_oxysporum;Acc:FOXG_04166]
FOXG_10432	3177.87	2930.26	2889.44	1906.23	1905.11	1917.74	2999.19	1909.7	0.651431	1.49347e-14	conserved hypothetical protein [Source:BROAD_F_oxysporum;Acc:FOXG_10432]
FOXG_09455	1076.74	968.67	853.009	1860.74	1713.44	1707.06	966.14	1760.41	-0.865092	1.54614e-14	negative regulator of differentiation 1 [Source:BROAD_F_oxysporum;Acc:FOXG_09455]
FOXG_03812	3489.91	3181.51	3336.74	2049.85	2187.23	2126.37	3336.05	2121.15	0.653324	1.58548e-14	hypothetical protein similar to glutamate carboxypeptidase [Source:BROAD_F_oxysporum;Acc:FOXG_03812]
FOXG_04177	2586.64	2739.61	2534.3	4007.82	4051.69	3961.89	2620.18	4007.13	-0.612972	1.59191e-14	eukaryotic translation initiation factor 5B [Source:BROAD_F_oxysporum;Acc:FOXG_04177]
FOXG_02141	6470.71	6476.54	7246.64	2687.64	3028.6	3962.92	6731.29	3226.39	1.06132	1.59216e-14	conserved hypothetical protein [Source:BROAD_F_oxysporum;Acc:FOXG_02141]
FOXG_03247	9556.2	10102.2	9258.35	14615.6	15606.8	17359.4	9638.9	15860.6	-0.718439	1.66135e-14	hypothetical protein similar to PH domain protein [Source:BROAD_F_oxysporum;Acc:FOXG_03247]
FOXG_10350	256.611	235.831	240.506	903.61	701.142	492.282	244.316	699.011	-1.51733	1.67799e-14	hypothetical protein similar to ribosome biogenesis protein Rrb1 [Source:BROAD_F_oxysporum;Acc:FOXG_10350]
FOXG_05918	1382.62	1259.6	1258.72	651.17	679.568	796.489	1300.31	709.076	0.876421	1.67915e-14	conserved hypothetical protein [Source:BROAD_F_oxysporum;Acc:FOXG_05918]
FOXG_09866	314.092	292.034	349.52	139.154	142.718	134.632	318.549	138.835	1.1968	1.68203e-14	conserved hypothetical protein [Source:BROAD_F_oxysporum;Acc:FOXG_09866]
FOXG_08287	658.978	674.433	705.783	1370.13	1160.83	1161.33	679.731	1230.76	-0.856937	1.7166e-14	hypothetical protein similar to HEAT repeat protein [Source:BROAD_F_oxysporum;Acc:FOXG_08287]
FOXG_16527	1703.9	1500.94	1680.17	249.764	201.63	89.4123	1628.34	180.269	3.17358	1.73613e-14	hypothetical protein similar to PDZ domain protein [Source:BROAD_F_oxysporum;Acc:FOXG_16527]
FOXG_11476	1492.45	1526.29	1594.76	875.957	908.58	982.508	1537.83	922.348	0.738108	1.75852e-14	hypothetical protein similar to glutathione S-transferase [Source:BROAD_F_oxysporum;Acc:FOXG_11476]
FOXG_00631	166.284	179.628	146.102	480.795	431.472	337.095	164.005	416.454	-1.34562	1.76141e-14	transcription factor FET5 [Source:BROAD_F_oxysporum;Acc:FOXG_00631]
FOXG_08008	575.836	606.108	574.292	973.187	991.555	1055.48	585.412	1006.74	-0.781747	1.76598e-14	predicted protein [Source:BROAD_F_oxysporum;Acc:FOXG_08008]
FOXG_02824	360.282	368.073	397.846	162.346	174.248	188.074	375.4	174.89	1.10331	1.78578e-14	predicted protein [Source:BROAD_F_oxysporum;Acc:FOXG_02824]
FOXG_10333	308.96	284.32	266.354	600.325	632.272	524.141	286.545	585.579	-1.03153	1.81053e-14	hypothetical protein similar to alpha-1,2-mannosyltransferase Kre5 [Source:BROAD_F_oxysporum;Acc:FOXG_10333]
FOXG_06267	1764.46	1756.61	1703.77	1115.02	1100.25	1102.75	1741.61	1106.01	0.655136	1.89387e-14	conserved hypothetical protein [Source:BROAD_F_oxysporum;Acc:FOXG_06267]
FOXG_11087	1811.68	1498.74	1717.26	805.488	937.621	958.87	1675.89	900.66	0.896363	1.90373e-14	conserved hypothetical protein [Source:BROAD_F_oxysporum;Acc:FOXG_11087]
FOXG_07607	385.943	379.093	360.759	1065.96	872.901	690.633	375.265	876.497	-1.22453	1.95383e-14	conserved hypothetical protein [Source:BROAD_F_oxysporum;Acc:FOXG_07607]
FOXG_05421	195.025	185.138	170.827	528.964	461.343	365.871	183.663	452.059	-1.30025	1.9753e-14	hypothetical protein similar to small nucleolar ribonucleoprotein complex subunit [Source:BROAD_F_oxysporum;Acc:FOXG_05421]
FOXG_05230	260.717	186.24	215.781	51.7368	68.8695	81.1905	220.913	67.2656	1.72101	1.977e-14	conserved hypothetical protein [Source:BROAD_F_oxysporum;Acc:FOXG_05230]
FOXG_13012	21.5553	24.2443	13.4863	160.562	87.9539	117.161	19.762	121.892	-2.62093	2.00414e-14	conserved hypothetical protein [Source:BROAD_F_oxysporum;Acc:FOXG_13012]
FOXG_05422	4163.26	3820.68	3902.04	7034.42	5976.71	6540.46	3961.99	6517.2	-0.71788	2.0831e-14	conserved hypothetical protein [Source:BROAD_F_oxysporum;Acc:FOXG_05422]
FOXG_05734	212.474	179.628	147.225	399.622	442.259	426.507	179.776	422.796	-1.23158	2.10481e-14	hypothetical protein similar to kinesin motor protein [Source:BROAD_F_oxysporum;Acc:FOXG_05734]
FOXG_08504	7167.66	7050.69	7509.62	3978.38	4387.74	4783.05	7242.66	4383.05	0.724773	2.13185e-14	conserved hypothetical protein [Source:BROAD_F_oxysporum;Acc:FOXG_08504]
FOXG_02044	7883.1	6802.73	7018.5	4647.39	4196.89	4034.86	7234.78	4293.05	0.752909	2.13946e-14	conserved hypothetical protein [Source:BROAD_F_oxysporum;Acc:FOXG_02044]
FOXG_03250	1342.59	1417.19	1401.45	867.929	803.201	732.77	1387.08	801.3	0.790631	2.19774e-14	3,4-dihydroxy-2-butanone 4-phosphate synthase [Source:BROAD_F_oxysporum;Acc:FOXG_03250]
FOXG_02054	881.716	954.344	840.646	353.237	475.449	461.45	892.235	430.045	1.05319	2.20749e-14	conserved hypothetical protein [Source:BROAD_F_oxysporum;Acc:FOXG_02054]
FOXG_17126	157.046	135.548	137.111	336.289	353.475	302.152	143.235	330.639	-1.20699	2.2956e-14	conserved hypothetical protein [Source:BROAD_F_oxysporum;Acc:FOXG_17126]
FOXG_08690	2417.28	2271.25	2464.62	1206.89	1078.68	1460.4	2384.38	1248.66	0.93435	2.30295e-14	hypothetical protein similar to alpha/beta hydrolase [Source:BROAD_F_oxysporum;Acc:FOXG_08690]
FOXG_10282	3776.29	3515.42	3408.66	7041.55	6357.57	5546.65	3566.79	6315.26	-0.824283	2.3108e-14	hypothetical protein similar to GTP-binding protein YchF [Source:BROAD_F_oxysporum;Acc:FOXG_10282]
FOXG_01605	542.989	508.028	442.8	219.435	228.182	257.96	497.939	235.192	1.08473	2.4617e-14	conserved hypothetical protein [Source:BROAD_F_oxysporum;Acc:FOXG_01605]
FOXG_03630	2933.58	2831.07	2661.3	4476.12	4245.85	4747.08	2808.65	4489.68	-0.676389	2.483e-14	conserved hypothetical protein [Source:BROAD_F_oxysporum;Acc:FOXG_03630]
FOXG_03211	542.989	391.215	413.58	972.295	1282.8	1905.41	449.261	1386.83	-1.62501	2.6307e-14	hypothetical protein similar to extracellular invertase [Source:BROAD_F_oxysporum;Acc:FOXG_03211]
FOXG_02835	58.5074	60.6108	69.6792	8.02812	4.14877	3.08318	62.9325	5.08669	3.61401	2.63431e-14	conserved hypothetical protein [Source:BROAD_F_oxysporum;Acc:FOXG_02835]
FOXG_10073	98.5387	119.018	133.739	24.0844	29.8711	28.7764	117.098	27.5773	2.08473	2.72597e-14	trans-aconitate 2-methyltransferase [Source:BROAD_F_oxysporum;Acc:FOXG_10073]
FOXG_05283	676.427	717.411	682.182	1146.24	1203.97	1378.18	692.007	1242.8	-0.844076	2.72863e-14	conserved hypothetical protein [Source:BROAD_F_oxysporum;Acc:FOXG_05283]
FOXG_06407	645.634	545.497	548.443	1191.73	1008.15	1087.34	579.858	1095.74	-0.917218	2.80242e-14	conserved hypothetical protein [Source:BROAD_F_oxysporum;Acc:FOXG_06407]
FOXG_00623	941.25	941.12	787.825	1582.43	1540.02	1539.54	890.065	1554	-0.803586	2.83268e-14	hypothetical protein similar to cytoplasmic dynein intermediate chain [Source:BROAD_F_oxysporum;Acc:FOXG_00623]
FOXG_03824	661.031	619.332	572.044	1613.65	1296.07	1104.81	617.469	1338.18	-1.11601	2.92705e-14	conserved hypothetical protein [Source:BROAD_F_oxysporum;Acc:FOXG_03824]
FOXG_03500	1193.76	1081.08	1074.41	1834.87	1816.33	1791.33	1116.41	1814.18	-0.700112	2.93762e-14	conserved hypothetical protein [Source:BROAD_F_oxysporum;Acc:FOXG_03500]
FOXG_06129	1550.96	1428.21	1291.31	3838.33	3308.23	2451.13	1423.49	3199.23	-1.16842	3.08518e-14	conserved hypothetical protein [Source:BROAD_F_oxysporum;Acc:FOXG_06129]
FOXG_15639	613.814	609.414	713.65	252.44	299.541	344.289	645.626	298.757	1.11343	3.13773e-14	conserved hypothetical protein [Source:BROAD_F_oxysporum;Acc:FOXG_15639]
FOXG_11306	7842.04	7840.83	8753.73	4183.54	4077.41	5183.86	8145.53	4481.6	0.862275	3.1458e-14	conserved hypothetical protein [Source:BROAD_F_oxysporum;Acc:FOXG_11306]
FOXG_12994	103.671	107.997	132.615	31.2205	13.2761	14.3882	114.761	19.6282	2.54364	3.32192e-14	conserved hypothetical protein [Source:BROAD_F_oxysporum;Acc:FOXG_12994]
FOXG_11266	173.469	186.24	124.748	388.026	398.282	384.37	161.486	390.226	-1.27173	3.37191e-14	hypothetical protein similar to small nucleolar ribonucleoprotein complex subunit SOF1 [Source:BROAD_F_oxysporum;Acc:FOXG_11266]
FOXG_05124	1061.34	1075.57	991.243	1707.31	1677.76	1644.36	1042.72	1676.48	-0.685038	3.4043e-14	Poly(A)+ RNA export protein [Source:BROAD_F_oxysporum;Acc:FOXG_05124]
FOXG_00199	239.162	251.259	231.515	483.471	464.662	462.478	240.645	470.204	-0.966466	3.41137e-14	mitochondrial import inner membrane translocase subunit tim-54 [Source:BROAD_F_oxysporum;Acc:FOXG_00199]
FOXG_12869	3812.22	3600.28	3991.95	2399.52	2435.33	2503.55	3801.48	2446.13	0.636171	3.46364e-14	hypothetical protein similar to allantoinase [Source:BROAD_F_oxysporum;Acc:FOXG_12869]
FOXG_03609	46255.7	42696.4	46645.8	17394.3	16808.3	26225.6	45199.3	20142.7	1.16611	3.64149e-14	conserved hypothetical protein [Source:BROAD_F_oxysporum;Acc:FOXG_03609]
FOXG_15714	96.4858	59.5088	96.6518	8.02812	9.12729	15.4159	84.2155	10.8571	2.97576	3.8785e-14	siderophore iron transporter mirA [Source:BROAD_F_oxysporum;Acc:FOXG_15714]
FOXG_15641	7736.32	7227.01	7742.26	3139.89	3525.62	4591.89	7568.53	3752.47	1.01252	3.95088e-14	conserved hypothetical protein [Source:BROAD_F_oxysporum;Acc:FOXG_15641]
FOXG_01140	207.342	215.995	179.817	447.791	399.111	427.535	201.051	424.812	-1.07817	4.04391e-14	predicted protein [Source:BROAD_F_oxysporum;Acc:FOXG_01140]
FOXG_13569	60.5603	60.6108	58.4406	0.892014	1.65951	6.16637	59.8706	2.90596	4.43972	4.20871e-14	conserved hypothetical protein [Source:BROAD_F_oxysporum;Acc:FOXG_13569]
FOXG_08196	208.368	185.138	239.382	420.138	469.64	494.337	210.963	461.372	-1.12883	4.22563e-14	conserved hypothetical protein [Source:BROAD_F_oxysporum;Acc:FOXG_08196]
FOXG_04120	1427.78	1186.87	1082.28	636.006	662.143	606.359	1232.31	634.836	0.956858	4.29944e-14	endoglucanase-4 precursor [Source:BROAD_F_oxysporum;Acc:FOXG_04120]
FOXG_10406	236.082	277.708	302.318	567.321	528.553	563.195	272.036	553.023	-1.02469	4.30165e-14	conserved hypothetical protein [Source:BROAD_F_oxysporum;Acc:FOXG_10406]
FOXG_09077	1292.29	1367.6	1374.48	852.765	790.755	751.269	1344.79	798.263	0.75167	4.31795e-14	conserved hypothetical protein [Source:BROAD_F_oxysporum;Acc:FOXG_09077]
FOXG_00949	2118.58	2101.54	1958.89	3326.32	3111.58	3192.12	2059.67	3210.01	-0.639986	4.39441e-14	conserved hypothetical protein [Source:BROAD_F_oxysporum;Acc:FOXG_00949]
FOXG_13748	10134.1	10498.9	10514.8	15690.5	17920.2	20098.2	10382.6	17903	-0.785988	4.39456e-14	conserved hypothetical protein [Source:BROAD_F_oxysporum;Acc:FOXG_13748]
FOXG_15472	241.215	214.893	251.744	51.7368	53.1042	96.6064	235.951	67.1491	1.82414	4.39487e-14	conserved hypothetical protein [Source:BROAD_F_oxysporum;Acc:FOXG_15472]
FOXG_07741	2620.51	2492.76	2409.55	4231.71	3824.33	3868.37	2507.61	3974.8	-0.664456	4.43699e-14	conserved hypothetical protein [Source:BROAD_F_oxysporum;Acc:FOXG_07741]
FOXG_03270	126.253	90.3651	132.615	300.609	282.946	318.596	116.411	300.717	-1.36773	4.54539e-14	conserved hypothetical protein [Source:BROAD_F_oxysporum;Acc:FOXG_03270]
FOXG_08323	162.178	180.73	142.73	578.917	467.981	342.233	161.88	463.044	-1.51736	4.54542e-14	hypothetical protein similar to Esf2p [Source:BROAD_F_oxysporum;Acc:FOXG_08323]
novel.536	14.3702	13.2242	4.49543	88.3093	77.9968	81.1905	10.6966	82.4989	-2.93589	4.55376e-14	PF03184:DDE superfamily endonuclease|PF05225:helix-turn-helix, Psq domain|PF03221:Tc5 transposase DNA-binding domain
FOXG_12721	338.727	336.114	365.254	115.962	108.698	169.575	346.698	131.412	1.40618	4.60979e-14	hypothetical protein similar to acyl-CoA dehydrogenase [Source:BROAD_F_oxysporum;Acc:FOXG_12721]
FOXG_01825	710.3	724.023	684.43	1147.13	1245.46	1394.63	706.251	1262.41	-0.83717	4.67111e-14	hypothetical protein [Source:BROAD_F_oxysporum;Acc:FOXG_01825]
FOXG_06275	19539.4	18419.1	19085.4	28987.8	27611.7	27374.6	19014.6	27991.3	-0.557869	4.68609e-14	elongation factor 2 [Source:BROAD_F_oxysporum;Acc:FOXG_06275]
FOXG_12052	192.972	178.526	222.524	61.5489	53.934	79.135	198.007	64.8727	1.61738	5.03151e-14	conserved hypothetical protein [Source:BROAD_F_oxysporum;Acc:FOXG_12052]
FOXG_04406	176.549	195.056	137.111	372.862	438.94	396.703	169.572	402.835	-1.24787	5.19754e-14	conserved hypothetical protein [Source:BROAD_F_oxysporum;Acc:FOXG_04406]
FOXG_07464	195.025	152.078	207.914	38.3566	43.1472	67.83	185.005	49.7779	1.90454	5.29173e-14	copper amine oxidase 1 [Source:BROAD_F_oxysporum;Acc:FOXG_07464]
FOXG_09879	3972.34	4340.83	3911.03	2603.79	2093.47	2326.78	4074.73	2341.34	0.799499	5.29405e-14	hypothetical protein similar to neutral amino acid permease [Source:BROAD_F_oxysporum;Acc:FOXG_09879]
FOXG_03768	5932.85	5536.52	5778.88	9082.48	10582.7	12488.9	5749.42	10718	-0.898433	5.37639e-14	hypothetical protein similar to phosphatidyl synthase [Source:BROAD_F_oxysporum;Acc:FOXG_03768]
FOXG_09477	513.222	495.906	397.846	958.023	896.134	874.596	468.992	909.584	-0.954977	5.40045e-14	hypothetical protein similar to DNA polymerase alpha catalytic subunit [Source:BROAD_F_oxysporum;Acc:FOXG_09477]
FOXG_13926	2461.41	2367.13	2385.95	1285.39	1332.58	1572.42	2404.83	1396.8	0.78472	5.41098e-14	conserved hypothetical protein [Source:BROAD_F_oxysporum;Acc:FOXG_13926]
FOXG_06330	1633.07	1421.6	1508.22	804.596	857.965	942.426	1520.96	868.329	0.809683	6.11871e-14	hypothetical protein similar to mitochondrial ATPase Afg1 [Source:BROAD_F_oxysporum;Acc:FOXG_06330]
FOXG_00062	612.788	672.229	501.241	1244.36	1176.59	1087.34	595.419	1169.43	-0.973815	6.12647e-14	conserved hypothetical protein [Source:BROAD_F_oxysporum;Acc:FOXG_00062]
FOXG_04276	1103.43	946.63	1065.42	552.156	516.107	616.637	1038.49	561.633	0.888492	6.13504e-14	conserved hypothetical protein [Source:BROAD_F_oxysporum;Acc:FOXG_04276]
FOXG_15391	1433.94	1439.23	1452.03	660.09	677.909	885.901	1441.73	741.3	0.96136	6.16935e-14	conserved hypothetical protein [Source:BROAD_F_oxysporum;Acc:FOXG_15391]
FOXG_10006	1573.54	1667.35	1794.8	959.807	980.769	781.073	1678.56	907.216	0.886296	6.22521e-14	conserved hypothetical protein [Source:BROAD_F_oxysporum;Acc:FOXG_10006]
FOXG_09183	873.505	901.447	756.357	1567.27	1516.79	1390.52	843.77	1491.52	-0.821949	6.47423e-14	conserved hypothetical protein [Source:BROAD_F_oxysporum;Acc:FOXG_09183]
FOXG_04186	552.227	534.477	560.805	987.459	968.322	888.985	549.17	948.255	-0.788686	6.48504e-14	conserved hypothetical protein [Source:BROAD_F_oxysporum;Acc:FOXG_04186]
FOXG_04242	512.196	473.866	384.36	1080.23	933.473	860.208	456.807	957.97	-1.06797	6.51368e-14	hypothetical protein similar to class I alpha-mannosidase [Source:BROAD_F_oxysporum;Acc:FOXG_04242]
FOXG_13137	83.142	69.4269	96.6518	14.2722	14.1058	14.3882	83.0736	14.2554	2.54312	7.03662e-14	conserved hypothetical protein [Source:BROAD_F_oxysporum;Acc:FOXG_13137]
FOXG_00426	965.885	874.999	918.192	536.1	535.191	543.668	919.692	538.32	0.773149	7.10152e-14	hypothetical protein similar to ammonium permease [Source:BROAD_F_oxysporum;Acc:FOXG_00426]
FOXG_08411	1121.9	1238.66	1098.01	695.771	679.568	646.441	1152.86	673.927	0.773959	7.15749e-14	conserved hypothetical protein [Source:BROAD_F_oxysporum;Acc:FOXG_08411]
FOXG_05291	1595.1	1872.32	1754.34	3695.61	3391.2	2792.34	1740.59	3293.05	-0.920318	7.46805e-14	hypothetical protein similar to chitin synthase G [Source:BROAD_F_oxysporum;Acc:FOXG_05291]
FOXG_08549	160.125	145.466	122.501	426.382	384.176	300.097	142.697	370.218	-1.37553	7.65686e-14	conserved hypothetical protein [Source:BROAD_F_oxysporum;Acc:FOXG_08549]
FOXG_07087	93.4065	77.141	118.005	6.24409	2.48926	18.4991	96.1842	9.07749	3.45573	7.72065e-14	predicted protein [Source:BROAD_F_oxysporum;Acc:FOXG_07087]
FOXG_02138	655.898	661.208	614.751	1073.98	1053.79	1164.42	643.952	1097.4	-0.768183	7.81091e-14	conserved hypothetical protein [Source:BROAD_F_oxysporum;Acc:FOXG_02138]
FOXG_01110	1965.64	1909.79	1951.02	2993.6	2870.12	2934.16	1942.15	2932.63	-0.594443	7.84477e-14	conserved hypothetical protein [Source:BROAD_F_oxysporum;Acc:FOXG_01110]
FOXG_01190	188.866	126.732	151.721	496.852	453.875	339.15	155.773	429.959	-1.46445	7.94985e-14	hypothetical protein similar to Wdr1p [Source:BROAD_F_oxysporum;Acc:FOXG_01190]
FOXG_05177	12816.2	12605.9	13430.1	5582.22	6086.24	8033.75	12950.7	6567.4	0.979841	8.02829e-14	conserved hypothetical protein [Source:BROAD_F_oxysporum;Acc:FOXG_05177]
FOXG_10038	642.555	652.392	756.357	325.585	342.688	384.37	683.768	350.881	0.963658	8.45539e-14	hypothetical protein [Source:BROAD_F_oxysporum;Acc:FOXG_10038]
FOXG_11021	5626.97	5281.95	5667.62	9370.6	10911.3	14440.6	5525.51	11574.2	-1.06662	8.47009e-14	hypothetical protein [Source:BROAD_F_oxysporum;Acc:FOXG_11021]
FOXG_13684	153.967	175.22	155.092	359.481	345.177	334.012	161.426	346.223	-1.10174	8.50964e-14	predicted protein [Source:BROAD_F_oxysporum;Acc:FOXG_13684]
FOXG_11521	778.045	740.553	683.306	1452.2	1440.45	1183.94	733.968	1358.86	-0.888999	8.6089e-14	mitochondrial import receptor subunit tom-22 [Source:BROAD_F_oxysporum;Acc:FOXG_11521]
FOXG_07639	167.311	188.444	158.464	57.0889	48.9555	26.7209	171.406	44.2551	1.94221	8.63687e-14	conserved hypothetical protein [Source:BROAD_F_oxysporum;Acc:FOXG_07639]
FOXG_15429	42.0842	53.9987	44.9543	159.67	144.377	151.076	47.0124	151.708	-1.6915	8.742e-14	conserved hypothetical protein [Source:BROAD_F_oxysporum;Acc:FOXG_15429]
FOXG_00558	258.664	245.749	279.841	489.715	552.616	657.746	261.418	566.692	-1.11513	8.90143e-14	hypothetical protein [Source:BROAD_F_oxysporum;Acc:FOXG_00558]
FOXG_02468	122.147	124.528	133.739	24.9764	26.5521	43.1646	126.805	31.5644	2.02008	9.02128e-14	conserved hypothetical protein [Source:BROAD_F_oxysporum;Acc:FOXG_02468]
novel.266	922.774	830.919	997.986	472.767	497.022	530.308	917.226	500.032	0.875969	9.04704e-14	-
FOXG_03912	32129.8	31301.6	33722.5	19082.8	17755.9	21780.6	32384.6	19539.8	0.728966	9.34997e-14	hypothetical protein similar to C4-dicarboxylate transporter/malic acid transport protein [Source:BROAD_F_oxysporum;Acc:FOXG_03912]
FOXG_03373	4351.1	4394.83	4352.7	2891.02	2913.26	2578.57	4366.21	2794.28	0.643485	9.62904e-14	ATP synthase D chain, mitochondrial [Source:BROAD_F_oxysporum;Acc:FOXG_03373]
FOXG_11596	3704.44	3988.19	3939.12	1912.48	1852.01	2462.44	3877.25	2075.64	0.902127	9.92845e-14	conserved hypothetical protein [Source:BROAD_F_oxysporum;Acc:FOXG_11596]
FOXG_07548	1228.65	1254.09	1204.78	2056.98	1976.47	1850.94	1229.17	1961.46	-0.674561	1.09629e-13	hypothetical protein similar to conserved fungal protein [Source:BROAD_F_oxysporum;Acc:FOXG_07548]
FOXG_01726	986.414	971.976	953.032	498.636	515.277	605.332	970.474	539.748	0.848251	1.10962e-13	conserved hypothetical protein [Source:BROAD_F_oxysporum;Acc:FOXG_01726]
FOXG_00532	400.314	427.581	413.58	688.634	803.201	810.877	413.825	767.571	-0.891239	1.14771e-13	conserved hypothetical protein [Source:BROAD_F_oxysporum;Acc:FOXG_00532]
FOXG_15459	4972.1	4809.19	5975.56	2126.56	2126.66	3037.96	5252.28	2430.39	1.11222	1.20107e-13	conserved hypothetical protein [Source:BROAD_F_oxysporum;Acc:FOXG_15459]
FOXG_04286	2337.22	2144.52	2290.42	1399.57	1464.51	1459.37	2257.39	1441.15	0.647563	1.2062e-13	conserved hypothetical protein [Source:BROAD_F_oxysporum;Acc:FOXG_04286]
FOXG_00494	9125.1	8816.11	8789.7	6260.15	6024.01	5829.27	8910.3	6037.81	0.561389	1.21258e-13	cytochrome c1, mitochondrial precursor [Source:BROAD_F_oxysporum;Acc:FOXG_00494]
FOXG_11190	1914.32	1853.59	2101.62	943.75	994.045	1218.89	1956.51	1052.23	0.895821	1.224e-13	protein phosphatase 1 regulatory subunit SDS22 [Source:BROAD_F_oxysporum;Acc:FOXG_11190]
FOXG_07090	78.0098	55.1007	67.4315	196.243	179.227	212.74	66.8473	196.07	-1.54838	1.25028e-13	conserved hypothetical protein [Source:BROAD_F_oxysporum;Acc:FOXG_07090]
novel.163	75.9569	56.2027	56.1929	7.13611	4.14877	7.1941	62.7842	6.15966	3.36714	1.25952e-13	-
FOXG_02299	30159	28710.8	29740.7	13569.3	14570.5	18853.7	29536.8	15664.5	0.915108	1.27524e-13	hypothetical protein similar to lipid particle protein [Source:BROAD_F_oxysporum;Acc:FOXG_02299]
FOXG_03078	280.219	300.85	295.575	538.776	552.616	660.829	292.215	584.074	-0.998072	1.28698e-13	conserved hypothetical protein [Source:BROAD_F_oxysporum;Acc:FOXG_03078]
FOXG_00684	186.813	203.873	168.579	538.776	504.49	360.732	186.421	468	-1.32943	1.31173e-13	conserved hypothetical protein [Source:BROAD_F_oxysporum;Acc:FOXG_00684]
FOXG_16420	346.938	366.971	320.3	622.625	629.783	637.191	344.736	629.867	-0.869162	1.34746e-13	conserved hypothetical protein [Source:BROAD_F_oxysporum;Acc:FOXG_16420]
FOXG_05046	5882.56	5581.7	6274.5	3609.09	3532.26	3970.11	5912.92	3703.82	0.675105	1.3668e-13	conserved hypothetical protein [Source:BROAD_F_oxysporum;Acc:FOXG_05046]
FOXG_13757	2217.12	2232.68	2384.83	1441.49	1387.35	1509.73	2278.21	1446.19	0.656015	1.58256e-13	superoxide dismutase, mitochondrial precursor [Source:BROAD_F_oxysporum;Acc:FOXG_13757]
FOXG_06425	216.58	178.526	169.703	462.063	438.94	373.065	188.27	424.689	-1.17314	1.58476e-13	conserved hypothetical protein [Source:BROAD_F_oxysporum;Acc:FOXG_06425]
FOXG_02193	305.881	289.83	334.91	124.882	95.4216	144.91	310.207	121.738	1.35515	1.60603e-13	conserved hypothetical protein [Source:BROAD_F_oxysporum;Acc:FOXG_02193]
novel.421	48.2429	60.6108	70.8031	4.46007	6.63803	3.08318	59.8856	4.72709	3.63447	1.62846e-13	PF00172:Fungal Zn(2)-Cys(6) binuclear cluster domain
novel.438	4278.22	4143.57	4297.64	2620.74	2886.71	2829.33	4239.81	2778.93	0.609481	1.65881e-13	PF13639:Ring finger domain
FOXG_04965	188.866	165.302	194.428	50.8448	12.4463	16.4436	182.865	26.5782	2.78002	1.70907e-13	predicted protein [Source:BROAD_F_oxysporum;Acc:FOXG_04965]
novel.520	72.8776	71.6309	68.5554	14.2722	6.63803	7.1941	71.0213	9.36811	2.91934	1.73764e-13	-
FOXG_04540	136.517	185.138	185.437	49.0607	27.3819	52.4141	169.031	42.9522	1.98533	1.73937e-13	methylmalonate-semialdehyde dehydrogenase, mitochondrial precursor [Source:BROAD_F_oxysporum;Acc:FOXG_04540]
FOXG_07574	1825.02	1769.83	1700.4	1099.85	1157.51	1098.64	1765.08	1118.67	0.657782	1.78597e-13	hypothetical protein similar to poly(ADP)-ribose polymerase [Source:BROAD_F_oxysporum;Acc:FOXG_07574]
FOXG_10934	50.2958	65.0188	60.6884	4.46007	0	2.05546	58.6677	2.17184	4.7823	1.79712e-13	conserved hypothetical protein [Source:BROAD_F_oxysporum;Acc:FOXG_10934]
FOXG_12671	10551.9	10407.4	10811.5	4055.09	4103.96	6292.78	10590.3	4817.28	1.13674	1.87796e-13	aspartate aminotransferase, mitochondrial precursor [Source:BROAD_F_oxysporum;Acc:FOXG_12671]
FOXG_01769	1686.45	1640.9	1781.32	732.343	537.68	922.9	1702.89	730.974	1.22176	1.94008e-13	hypothetical protein [Source:BROAD_F_oxysporum;Acc:FOXG_01769]
FOXG_05239	6261.31	5965.2	6011.52	9297.46	8706.6	9789.11	6079.35	9264.39	-0.607619	1.94869e-13	conserved hypothetical protein [Source:BROAD_F_oxysporum;Acc:FOXG_05239]
FOXG_07864	3506.34	3357.84	3734.58	2039.14	2196.36	2337.05	3532.92	2190.85	0.689633	2.06087e-13	hypothetical protein similar to glutamine amidotransferase [Source:BROAD_F_oxysporum;Acc:FOXG_07864]
FOXG_08012	699.009	726.227	761.976	393.378	354.305	431.646	729.071	393.109	0.893003	2.06179e-13	conserved hypothetical protein [Source:BROAD_F_oxysporum;Acc:FOXG_08012]
FOXG_17763	414.684	405.541	389.979	733.235	693.674	695.772	403.401	707.56	-0.810361	2.10589e-13	hypothetical protein [Source:BROAD_F_oxysporum;Acc:FOXG_17763]
FOXG_00731	873.505	895.937	913.697	1478.96	1618.02	1989.68	894.38	1695.55	-0.922224	2.17133e-13	conserved hypothetical protein [Source:BROAD_F_oxysporum;Acc:FOXG_00731]
novel.500	244.294	182.934	286.584	83.8493	77.9968	53.4419	237.937	71.7627	1.72317	2.22252e-13	-
FOXG_08843	3559.71	3522.04	3176.02	5710.67	5376.8	5140.7	3419.26	5409.39	-0.66177	2.26386e-13	hypothetical protein similar to eukaryotic translation initiation factor 3 subunit EifCb [Source:BROAD_F_oxysporum;Acc:FOXG_08843]
FOXG_09265	96.4858	139.956	126.996	34.7885	21.5736	27.7487	121.146	28.0369	2.11329	2.27862e-13	hypothetical protein [Source:BROAD_F_oxysporum;Acc:FOXG_09265]
FOXG_00852	1821.94	1903.18	1966.75	1252.39	1177.42	1183.94	1897.29	1204.58	0.655176	2.30903e-13	conserved hypothetical protein [Source:BROAD_F_oxysporum;Acc:FOXG_00852]
FOXG_07967	904.298	884.917	817.045	1496.8	1393.16	1391.54	868.753	1427.17	-0.715891	2.31771e-13	cytokinesis protein sepA [Source:BROAD_F_oxysporum;Acc:FOXG_07967]
FOXG_05853	367.467	327.298	309.061	614.597	618.996	708.105	334.609	647.233	-0.94978	2.32075e-13	hypothetical protein [Source:BROAD_F_oxysporum;Acc:FOXG_05853]
FOXG_05658	26.6876	25.3463	28.0965	96.3375	114.506	118.189	26.7101	109.677	-2.03727	2.32182e-13	hypothetical protein similar to tartrate transporter [Source:BROAD_F_oxysporum;Acc:FOXG_05658]
FOXG_02293	4287.46	4163.41	4109.95	2911.53	2674.3	2674.15	4186.94	2753.33	0.6047	2.37308e-13	ATP synthase delta chain, mitochondrial precursor [Source:BROAD_F_oxysporum;Acc:FOXG_02293]
FOXG_09781	143.702	132.242	180.941	38.3566	50.615	45.22	152.295	44.7305	1.7652	2.45189e-13	conserved hypothetical protein [Source:BROAD_F_oxysporum;Acc:FOXG_09781]
FOXG_11207	1129.09	1059.04	1231.75	610.137	651.356	693.716	1139.96	651.737	0.807208	2.45867e-13	conserved hypothetical protein [Source:BROAD_F_oxysporum;Acc:FOXG_11207]
FOXG_08680	305.881	274.401	295.575	132.91	138.569	116.133	291.952	129.204	1.17311	2.4733e-13	conserved hypothetical protein [Source:BROAD_F_oxysporum;Acc:FOXG_08680]
FOXG_02116	81.0891	56.2027	60.6884	214.975	212.417	171.631	65.9934	199.674	-1.59571	2.55843e-13	ATP-dependent RNA helicase DBP8 [Source:BROAD_F_oxysporum;Acc:FOXG_02116]
FOXG_05360	1335.4	1249.68	1249.73	2035.57	1966.52	1962.96	1278.27	1988.35	-0.637165	2.58446e-13	conserved hypothetical protein [Source:BROAD_F_oxysporum;Acc:FOXG_05360]
FOXG_00450	1525.3	1536.21	1604.87	816.192	994.045	913.65	1555.46	907.962	0.776222	2.67041e-13	hypothetical protein similar to anthranilate phosphoribosyltransferase [Source:BROAD_F_oxysporum;Acc:FOXG_00450]
FOXG_11236	10440	10213.5	10239.5	5500.16	6253.85	6884.75	10297.6	6212.92	0.729131	2.70273e-13	hypothetical protein similar to AAA protease IAP-1, mitochondrial [Source:BROAD_F_oxysporum;Acc:FOXG_11236]
FOXG_03863	2057	1903.18	2075.77	3554.67	3031.92	3731.68	2011.98	3439.42	-0.773188	2.70276e-13	conserved hypothetical protein [Source:BROAD_F_oxysporum;Acc:FOXG_03863]
FOXG_02797	101.618	85.9571	85.4133	22.3003	17.4248	18.4991	90.9961	19.4081	2.23046	2.77258e-13	conserved hypothetical protein [Source:BROAD_F_oxysporum;Acc:FOXG_02797]
FOXG_09112	724.67	785.736	850.761	437.979	293.733	318.596	787.056	350.102	1.16829	2.85458e-13	conserved hypothetical protein [Source:BROAD_F_oxysporum;Acc:FOXG_09112]
FOXG_16833	144.729	156.486	167.455	42.8167	58.0827	50.3587	156.223	50.4194	1.62851	2.89237e-13	conserved hypothetical protein [Source:BROAD_F_oxysporum;Acc:FOXG_16833]
FOXG_17184	89.3007	71.6309	93.2803	15.1642	19.0843	12.3327	84.7373	15.5271	2.43606	2.98836e-13	predicted protein [Source:BROAD_F_oxysporum;Acc:FOXG_17184]
FOXG_12270	106.75	106.895	115.757	33.0045	27.3819	19.5268	109.801	26.6377	2.03349	2.99722e-13	conserved hypothetical protein [Source:BROAD_F_oxysporum;Acc:FOXG_12270]
FOXG_05233	126.253	99.1813	125.872	437.087	355.964	254.877	117.102	349.309	-1.57795	3.05502e-13	conserved hypothetical protein [Source:BROAD_F_oxysporum;Acc:FOXG_05233]
FOXG_11687	772.913	774.716	791.196	446.007	440.599	478.921	779.608	455.176	0.777366	3.07801e-13	hypothetical protein similar to FMN-dependent dehydrogenase [Source:BROAD_F_oxysporum;Acc:FOXG_11687]
FOXG_01980	11107.2	11946.9	11627.4	7719.49	7573.99	8117	11560.5	7803.49	0.567087	3.25423e-13	hypothetical protein [Source:BROAD_F_oxysporum;Acc:FOXG_01980]
FOXG_06079	327.436	338.318	316.928	577.133	604.89	585.805	327.561	589.276	-0.847316	3.3668e-13	conserved hypothetical protein [Source:BROAD_F_oxysporum;Acc:FOXG_06079]
FOXG_00570	711.326	735.043	722.641	413.894	433.961	413.147	723.004	420.334	0.781791	3.3752e-13	hypothetical protein similar to IdgA domain protein [Source:BROAD_F_oxysporum;Acc:FOXG_00570]
FOXG_02374	4872.53	4610.83	4750.55	2953.46	3068.43	3292.84	4744.64	3104.91	0.612056	3.42954e-13	conserved hypothetical protein [Source:BROAD_F_oxysporum;Acc:FOXG_02374]
FOXG_02085	54.4016	39.6725	66.3077	172.159	162.632	174.714	53.4606	169.835	-1.66773	3.4522e-13	conserved hypothetical protein [Source:BROAD_F_oxysporum;Acc:FOXG_02085]
FOXG_06381	143.702	178.526	173.074	33.0045	55.5935	54.4696	165.101	47.6892	1.79234	3.61425e-13	hypothetical protein [Source:BROAD_F_oxysporum;Acc:FOXG_06381]
FOXG_12748	433.16	363.665	357.387	735.019	751.757	681.384	384.737	722.72	-0.909058	3.74177e-13	conserved hypothetical protein [Source:BROAD_F_oxysporum;Acc:FOXG_12748]
FOXG_12815	6303.4	6278.17	6548.72	3773.22	4342.1	3560.05	6376.77	3891.79	0.712042	3.76146e-13	Cytochrome c549 [Source:UniProtKB/TrEMBL;Acc:Q9UVX5]
novel.45	469.085	384.603	478.764	180.187	190.843	231.239	444.151	200.756	1.1487	3.8558e-13	-
FOXG_07035	167.311	158.69	137.111	322.017	329.412	358.677	154.37	336.702	-1.12271	3.89605e-13	conserved hypothetical protein [Source:BROAD_F_oxysporum;Acc:FOXG_07035]
FOXG_08035	746.225	795.654	693.421	1299.66	1191.53	1270.27	745.1	1253.82	-0.75044	3.95567e-13	hypothetical protein similar to dDENN domain protein [Source:BROAD_F_oxysporum;Acc:FOXG_08035]
FOXG_00692	1483.21	1502.04	1590.26	775.16	801.542	978.397	1525.17	851.7	0.84181	4.17819e-13	DNA-directed RNA polymerases I and III 40 kDa polypeptide [Source:BROAD_F_oxysporum;Acc:FOXG_00692]
FOXG_04251	2304.37	2299.9	2201.64	1254.17	1376.56	1503.57	2268.64	1378.1	0.719799	4.21774e-13	hypothetical protein similar to glycogenin [Source:BROAD_F_oxysporum;Acc:FOXG_04251]
FOXG_08429	568.65	524.559	483.259	1475.39	1260.4	911.595	525.489	1215.79	-1.21055	4.2192e-13	amidophosphoribosyltransferase [Source:BROAD_F_oxysporum;Acc:FOXG_08429]
FOXG_07429	282.272	214.893	245.001	512.908	492.874	496.393	247.389	500.725	-1.01587	4.32742e-13	hypothetical protein similar to tyrosyl-tRNA synthetase [Source:BROAD_F_oxysporum;Acc:FOXG_07429]
FOXG_01328	365.414	423.173	378.74	910.746	883.687	662.885	389.109	819.106	-1.07537	4.33896e-13	hypothetical protein similar to arsenic resistance protein ArsH [Source:BROAD_F_oxysporum;Acc:FOXG_01328]
FOXG_04299	3755.76	3758.97	4223.46	2552.94	2316.67	2496.35	3912.73	2455.32	0.67235	4.41328e-13	conserved hypothetical protein [Source:BROAD_F_oxysporum;Acc:FOXG_04299]
FOXG_16470	2416.25	2483.94	2464.62	1513.75	1676.1	1478.9	2454.94	1556.25	0.656977	4.48625e-13	conserved hypothetical protein [Source:BROAD_F_oxysporum;Acc:FOXG_16470]
FOXG_09314	204.263	203.873	222.524	422.814	460.513	391.564	210.22	424.964	-1.01734	4.54176e-13	conserved hypothetical protein [Source:BROAD_F_oxysporum;Acc:FOXG_09314]
FOXG_11205	366.441	416.561	413.58	765.348	713.588	685.495	398.861	721.477	-0.856273	4.68867e-13	predicted protein [Source:BROAD_F_oxysporum;Acc:FOXG_11205]
FOXG_02807	54.4016	52.8967	49.4498	2.67604	2.48926	2.05546	52.2493	2.40692	4.43151	4.77431e-13	hypothetical protein similar to cystathionine beta-lyase [Source:BROAD_F_oxysporum;Acc:FOXG_02807]
FOXG_03385	792.415	706.391	728.26	443.331	394.133	367.927	742.356	401.797	0.884923	4.94852e-13	hypothetical protein similar to triacylglycerol lipase [Source:BROAD_F_oxysporum;Acc:FOXG_03385]
FOXG_03366	2541.48	2177.58	2502.83	1315.72	1321.8	1539.54	2407.3	1392.35	0.790659	4.96958e-13	hypothetical protein similar to PIGC [Source:BROAD_F_oxysporum;Acc:FOXG_03366]
FOXG_05962	62.6131	58.4067	64.0599	8.02812	9.12729	5.13864	61.6933	7.43135	3.03413	5.0448e-13	hypothetical protein similar to glutathione S-transferase [Source:BROAD_F_oxysporum;Acc:FOXG_05962]
novel.411	905.324	839.735	959.775	446.899	481.257	547.779	901.611	491.978	0.875336	5.20905e-13	-
FOXG_17753	4861.24	4855.47	4318.99	7378.74	6947.53	7356.48	4678.57	7227.58	-0.627299	5.23543e-13	hypothetical protein [Source:BROAD_F_oxysporum;Acc:FOXG_17753]
FOXG_02394	23.6082	9.91813	11.2386	90.9854	111.187	80.1628	14.9216	94.1117	-2.64694	5.2849e-13	conserved hypothetical protein [Source:BROAD_F_oxysporum;Acc:FOXG_02394]
novel.136	252.505	289.83	386.607	122.206	113.676	116.133	309.647	117.338	1.39883	5.3191e-13	-
FOXG_01909	107.777	127.834	105.643	285.444	287.924	242.544	113.751	271.971	-1.25969	5.34823e-13	hypothetical protein [Source:BROAD_F_oxysporum;Acc:FOXG_01909]
FOXG_00143	3002.35	3036.05	3041.16	4786.54	4467.39	5371.93	3026.52	4875.29	-0.687555	5.50842e-13	conserved hypothetical protein [Source:BROAD_F_oxysporum;Acc:FOXG_00143]
FOXG_09222	1376.46	1438.13	1476.75	829.573	887.006	928.038	1430.45	881.539	0.698715	5.63261e-13	predicted protein [Source:BROAD_F_oxysporum;Acc:FOXG_09222]
FOXG_05766	985.387	1039.2	1027.21	606.569	643.059	611.498	1017.26	620.375	0.71285	5.86581e-13	nuclear movement protein nudC [Source:BROAD_F_oxysporum;Acc:FOXG_05766]
FOXG_12711	2698.52	2674.59	2683.77	4188.9	3903.16	3907.42	2685.63	3999.83	-0.574706	6.0003e-13	SEC14 cytosolic factor [Source:BROAD_F_oxysporum;Acc:FOXG_12711]
FOXG_10697	1584.83	1578.08	1758.84	982.107	1037.19	1031.84	1640.58	1017.05	0.689687	6.15263e-13	conserved hypothetical protein [Source:BROAD_F_oxysporum;Acc:FOXG_10697]
FOXG_11048	622.026	631.454	703.535	297.933	304.52	382.315	652.338	328.256	0.993231	6.53014e-13	conserved hypothetical protein [Source:BROAD_F_oxysporum;Acc:FOXG_11048]
FOXG_10856	63.6396	74.9369	66.3077	8.02812	10.7868	12.3327	68.2947	10.3826	2.72426	6.56151e-13	predicted protein [Source:BROAD_F_oxysporum;Acc:FOXG_10856]
FOXG_13316	69.7983	65.0188	47.2021	6.24409	4.14877	8.22182	60.673	6.2049	3.31406	6.61798e-13	hypothetical protein similar to amine oxidase [Source:BROAD_F_oxysporum;Acc:FOXG_13316]
FOXG_05112	4128.36	4023.45	4187.5	2722.43	2841.08	2834.47	4113.1	2799.32	0.555175	6.70591e-13	ubiquinol-cytochrome c reductase complex 14 kDa protein [Source:BROAD_F_oxysporum;Acc:FOXG_05112]
FOXG_08982	3861.49	3776.6	3833.48	5696.4	5608.3	6388.36	3823.86	5897.69	-0.624888	6.78766e-13	hypothetical protein similar to S-adenosylmethionine decarboxylase [Source:BROAD_F_oxysporum;Acc:FOXG_08982]
novel.68	93.4065	85.9571	119.129	25.8684	16.5951	9.24955	99.4975	17.2377	2.51397	6.94891e-13	-
FOXG_08141	1469.87	1405.07	1555.42	663.658	753.416	912.622	1476.79	776.566	0.928524	7.02391e-13	oxidation resistance protein 1 [Source:BROAD_F_oxysporum;Acc:FOXG_08141]
FOXG_06030	2612.3	2687.81	2485.98	1703.75	1707.63	1538.51	2595.36	1649.96	0.653003	7.08886e-13	hypothetical protein similar to retrograde regulation protein 2 [Source:BROAD_F_oxysporum;Acc:FOXG_06030]
FOXG_01925	3545.34	3580.44	3396.3	2005.25	2170.64	2382.27	3507.36	2186.05	0.682511	7.18394e-13	conserved hypothetical protein [Source:BROAD_F_oxysporum;Acc:FOXG_01925]
FOXG_00301	222.739	222.607	170.827	497.744	422.345	424.452	205.391	448.18	-1.12472	7.27583e-13	conserved hypothetical protein [Source:BROAD_F_oxysporum;Acc:FOXG_00301]
FOXG_06256	1048	1081.08	1024.96	537.884	664.633	579.639	1051.34	594.052	0.822695	7.40009e-13	conserved hypothetical protein [Source:BROAD_F_oxysporum;Acc:FOXG_06256]
FOXG_12741	10727.4	10630	11600.5	4812.41	5058.18	6931	10986	5600.53	0.972262	7.73854e-13	conserved hypothetical protein [Source:BROAD_F_oxysporum;Acc:FOXG_12741]
FOXG_00960	1659.76	1682.78	1559.92	2432.52	2631.98	2504.57	1634.15	2523.02	-0.626631	7.99496e-13	conserved hypothetical protein [Source:BROAD_F_oxysporum;Acc:FOXG_00960]
novel.638	75.9569	84.8551	79.794	17.8403	16.5951	12.3327	80.202	15.5894	2.35318	7.99826e-13	-
FOXG_02101	739.04	676.637	684.43	1149.81	1169.95	1376.13	700.036	1231.96	-0.814295	8.00266e-13	conserved hypothetical protein [Source:BROAD_F_oxysporum;Acc:FOXG_02101]
FOXG_06041	14167	12884.7	12274.8	20236.2	19601.3	20084.9	13108.8	19974.1	-0.60753	8.02114e-13	conserved hypothetical protein [Source:BROAD_F_oxysporum;Acc:FOXG_06041]
FOXG_10411	2379.3	2453.08	2606.23	1522.67	1666.97	1474.79	2479.54	1554.81	0.672652	8.09126e-13	conserved hypothetical protein [Source:BROAD_F_oxysporum;Acc:FOXG_10411]
FOXG_08840	112.909	125.63	79.794	260.468	288.754	384.37	106.111	311.197	-1.54916	8.15383e-13	predicted protein [Source:BROAD_F_oxysporum;Acc:FOXG_08840]
FOXG_11112	209.395	142.16	149.473	713.611	554.275	358.677	167.009	542.188	-1.69852	8.24757e-13	hypothetical protein similar to SDA1 domain protein [Source:BROAD_F_oxysporum;Acc:FOXG_11112]
FOXG_13670	113.935	80.447	94.4041	243.52	241.458	339.15	96.2622	274.709	-1.50842	8.46679e-13	predicted protein [Source:BROAD_F_oxysporum;Acc:FOXG_13670]
FOXG_05464	93.4065	88.1611	114.634	231.924	236.48	258.987	98.7337	242.464	-1.29645	8.74168e-13	hypothetical protein [Source:BROAD_F_oxysporum;Acc:FOXG_05464]
FOXG_13946	771.887	829.816	810.302	343.425	367.581	480.977	804.002	397.328	1.01937	8.80067e-13	hypothetical protein similar to pps1 dual specificty phosphatase [Source:BROAD_F_oxysporum;Acc:FOXG_13946]
FOXG_01924	2795.01	2490.55	2589.37	1561.02	1581.51	1753.3	2624.98	1631.95	0.686381	8.86765e-13	conserved hypothetical protein [Source:BROAD_F_oxysporum;Acc:FOXG_01924]
FOXG_03256	964.858	928.998	900.211	1536.94	1597.28	1411.07	931.356	1515.1	-0.702358	9.14075e-13	multicopy enhancer of UAS2 [Source:BROAD_F_oxysporum;Acc:FOXG_03256]
FOXG_03790	655.898	590.679	709.155	295.256	326.093	373.065	651.911	331.472	0.977543	9.17537e-13	conserved hypothetical protein [Source:BROAD_F_oxysporum;Acc:FOXG_03790]
FOXG_08063	11741.5	11371.7	11815.1	19461.1	17545.1	23026.2	11642.8	20010.8	-0.781265	9.17623e-13	conserved hypothetical protein [Source:BROAD_F_oxysporum;Acc:FOXG_08063]
novel.294	416.737	402.235	525.966	1010.65	864.603	827.321	448.313	900.858	-1.00777	9.66918e-13	-
FOXG_03166	117.015	122.324	159.588	26.7604	39.8282	40.0814	132.975	35.5567	1.90378	9.82655e-13	predicted protein [Source:BROAD_F_oxysporum;Acc:FOXG_03166]
FOXG_02267	96.4858	88.1611	73.0508	14.2722	20.7438	16.4436	85.8992	17.1532	2.31987	9.91386e-13	3-isopropylmalate dehydrogenase [Source:BROAD_F_oxysporum;Acc:FOXG_02267]
FOXG_09174	3332.87	3491.18	3579.49	2124.78	2250.29	2378.16	3467.85	2251.08	0.623625	1.03504e-12	conserved hypothetical protein [Source:BROAD_F_oxysporum;Acc:FOXG_09174]
FOXG_03045	323.33	336.114	336.034	117.746	139.399	172.658	331.826	143.268	1.21586	1.05354e-12	conserved hypothetical protein [Source:BROAD_F_oxysporum;Acc:FOXG_03045]
FOXG_10713	333.595	348.236	401.218	155.21	110.357	68.8578	361.016	111.475	1.69005	1.05567e-12	hypothetical protein similar to Ca2+ ATPase [Source:BROAD_F_oxysporum;Acc:FOXG_10713]
FOXG_15694	255.585	276.605	245.001	91.8774	102.06	126.411	259.064	106.783	1.28342	1.06645e-12	conserved hypothetical protein [Source:BROAD_F_oxysporum;Acc:FOXG_15694]
FOXG_10328	430.08	436.398	532.709	892.906	823.945	849.931	466.396	855.594	-0.876098	1.07314e-12	dihydroxy-acid dehydratase [Source:BROAD_F_oxysporum;Acc:FOXG_10328]
FOXG_08039	4028.8	3884.6	4234.7	2156	2378.9	2697.79	4049.36	2410.9	0.748526	1.09045e-12	conserved hypothetical protein [Source:BROAD_F_oxysporum;Acc:FOXG_08039]
FOXG_02021	200.157	178.526	175.322	647.602	536.85	353.538	184.668	512.664	-1.47394	1.17799e-12	conserved hypothetical protein [Source:BROAD_F_oxysporum;Acc:FOXG_02021]
FOXG_04093	593.285	617.128	563.053	340.749	330.242	326.817	591.155	332.603	0.829591	1.18333e-12	hypothetical protein similar to mitochondrial tricarboxylate transporter Ctp [Source:BROAD_F_oxysporum;Acc:FOXG_04093]
FOXG_08382	1982.07	1939.54	2219.62	1182.81	1207.29	1332.96	2047.08	1241.02	0.722501	1.18519e-12	hypothetical protein similar to glutathione S-transferase [Source:BROAD_F_oxysporum;Acc:FOXG_08382]
FOXG_15238	42.0842	49.5906	79.794	2.67604	2.48926	5.13864	57.1563	3.43465	4.08671	1.23804e-12	hypothetical protein similar to FMN-dependent dehydrogenase family protein [Source:BROAD_F_oxysporum;Acc:FOXG_15238]
FOXG_00970	1538.64	1309.19	1321.66	2545.81	2424.54	3424.39	1389.83	2798.25	-1.00894	1.24437e-12	hypothetical protein [Source:BROAD_F_oxysporum;Acc:FOXG_00970]
FOXG_06242	295.616	322.89	314.68	1055.25	789.925	574.5	311.062	806.559	-1.37566	1.2604e-12	conserved hypothetical protein [Source:BROAD_F_oxysporum;Acc:FOXG_06242]
novel.126	82.1156	93.6712	68.5554	18.7323	13.2761	7.1941	81.4474	13.0675	2.6234	1.30339e-12	-
FOXG_06259	4369.58	4161.2	4241.44	2678.72	2924.88	2907.44	4257.41	2837.01	0.585698	1.37825e-12	conserved hypothetical protein [Source:BROAD_F_oxysporum;Acc:FOXG_06259]
FOXG_08712	220.686	275.503	240.506	90.0934	98.7407	112.022	245.565	100.285	1.29431	1.39867e-12	quinate permease [Source:BROAD_F_oxysporum;Acc:FOXG_08712]
FOXG_06307	259.691	264.483	271.974	104.366	132.761	105.856	265.383	114.327	1.21103	1.49756e-12	conserved hypothetical protein [Source:BROAD_F_oxysporum;Acc:FOXG_06307]
FOXG_12700	196.051	207.179	266.354	93.6614	74.6778	77.0796	223.195	81.8063	1.4466	1.49895e-12	protein mmf1, mitochondrial precursor [Source:BROAD_F_oxysporum;Acc:FOXG_12700]
FOXG_08144	2129.87	2115.87	2200.52	1106.99	1288.61	1397.71	2148.75	1264.44	0.765551	1.56825e-12	conserved hypothetical protein [Source:BROAD_F_oxysporum;Acc:FOXG_08144]
FOXG_00395	1014.13	1072.26	1039.57	1613.65	1676.1	1922.88	1041.99	1737.54	-0.737222	1.57987e-12	conserved hypothetical protein [Source:BROAD_F_oxysporum;Acc:FOXG_00395]
FOXG_01804	4405.5	4376.1	4367.31	6162.92	6259.66	6274.28	4382.97	6232.29	-0.507826	1.58968e-12	vacuolar ATP synthase catalytic subunit A [Source:BROAD_F_oxysporum;Acc:FOXG_01804]
FOXG_10277	74.9305	67.2229	67.4315	171.267	183.376	216.851	69.8616	190.498	-1.44385	1.62055e-12	conserved hypothetical protein [Source:BROAD_F_oxysporum;Acc:FOXG_10277]
FOXG_01152	4104.75	4321	4480.82	6631.23	6862.89	6153.01	4302.19	6549.04	-0.606459	1.64098e-12	hypothetical protein similar to aquaporin [Source:BROAD_F_oxysporum;Acc:FOXG_01152]
FOXG_08250	599.444	654.596	521.47	1023.14	1096.1	1026.7	591.837	1048.65	-0.825257	1.64238e-12	pre-mRNA-splicing factor cef-1 [Source:BROAD_F_oxysporum;Acc:FOXG_08250]
FOXG_03897	33.8727	22.0403	23.601	111.502	97.0812	118.189	26.5047	108.924	-2.0315	1.64645e-12	predicted protein [Source:BROAD_F_oxysporum;Acc:FOXG_03897]
FOXG_08200	4132.47	4162.31	4396.53	7047.8	6707.73	8950.48	4230.44	7568.67	-0.839062	1.66233e-12	hypothetical protein [Source:BROAD_F_oxysporum;Acc:FOXG_08200]
FOXG_10313	4842.77	4939.23	5036.01	3110.45	2842.74	3403.83	4939.33	3119.01	0.663631	1.69153e-12	conserved hypothetical protein [Source:BROAD_F_oxysporum;Acc:FOXG_10313]
FOXG_06005	1742.9	1740.08	1817.28	933.046	908.58	1160.3	1766.75	1000.64	0.821447	1.77701e-12	hypothetical protein [Source:BROAD_F_oxysporum;Acc:FOXG_06005]
FOXG_09274	1482.19	1518.58	1396.96	2643.04	2444.45	2188.03	1465.91	2425.17	-0.726581	1.77824e-12	hypothetical protein similar to eukaryotic translation initiation factor 3 subunit EifCh [Source:BROAD_F_oxysporum;Acc:FOXG_09274]
FOXG_08293	247.373	250.157	182.065	730.559	623.975	439.868	226.532	598.134	-1.40111	1.81815e-12	ATP-dependent RNA helicase DBP10 [Source:BROAD_F_oxysporum;Acc:FOXG_08293]
FOXG_01123	535.804	508.028	516.975	827.789	1089.47	1042.12	520.269	986.457	-0.922783	1.83509e-12	conserved hypothetical protein [Source:BROAD_F_oxysporum;Acc:FOXG_01123]
FOXG_12119	790.363	718.513	749.614	381.782	410.728	462.478	752.83	418.329	0.849544	1.83667e-12	conserved hypothetical protein [Source:BROAD_F_oxysporum;Acc:FOXG_12119]
FOXG_13314	774.966	732.839	777.71	451.359	458.854	453.228	761.838	454.48	0.745213	1.88383e-12	conserved hypothetical protein [Source:BROAD_F_oxysporum;Acc:FOXG_13314]
FOXG_03149	307.933	325.094	274.221	640.466	560.084	542.64	302.416	581.063	-0.942227	1.95581e-12	conserved hypothetical protein [Source:BROAD_F_oxysporum;Acc:FOXG_03149]
FOXG_11339	1159.88	1105.32	1067.67	1712.67	1743.31	1692.67	1110.96	1716.22	-0.627268	1.97551e-12	pre-mRNA-splicing factor syf-1 [Source:BROAD_F_oxysporum;Acc:FOXG_11339]
FOXG_08481	47782	40905.7	41586.1	71264.7	65306.6	77731.2	43424.6	71434.2	-0.718073	2.00406e-12	hypothetical protein [Source:BROAD_F_oxysporum;Acc:FOXG_08481]
FOXG_03451	105.724	125.63	106.767	23.1924	16.5951	36.9982	112.707	25.5952	2.15746	2.05493e-12	conserved hypothetical protein [Source:BROAD_F_oxysporum;Acc:FOXG_03451]
FOXG_02131	442.398	411.051	411.332	802.812	720.226	705.021	421.594	742.687	-0.816778	2.06532e-12	hypothetical protein similar to alpha-actinin [Source:BROAD_F_oxysporum;Acc:FOXG_02131]
novel.273	81.0891	70.5289	124.748	8.92014	8.29753	21.5823	92.1221	12.9333	2.85968	2.11558e-12	-
FOXG_10596	82.1156	85.9571	76.4224	14.2722	16.5951	20.5546	81.4984	17.1406	2.25784	2.11637e-12	conserved hypothetical protein [Source:BROAD_F_oxysporum;Acc:FOXG_10596]
FOXG_08904	120.094	96.9772	106.767	26.7604	32.3604	16.4436	107.946	25.1881	2.0846	2.16605e-12	conserved hypothetical protein [Source:BROAD_F_oxysporum;Acc:FOXG_08904]
novel.684	492.694	456.234	548.443	279.2	217.395	225.072	499.123	240.556	1.05255	2.19014e-12	-
FOXG_11015	10680.2	9983.14	10667.7	4334.29	4391.06	6517.85	10443.7	5081.07	1.03971	2.30533e-12	hypothetical protein similar to NADP-dependent alcohol dehydrogenase [Source:BROAD_F_oxysporum;Acc:FOXG_11015]
FOXG_01151	182.707	212.689	201.171	83.8493	81.3158	70.9132	198.856	78.6928	1.33359	2.31088e-12	hypothetical protein similar to D-isomer specific 2-hydroxyacid dehydrogenase family protein [Source:BROAD_F_oxysporum;Acc:FOXG_01151]
FOXG_03764	221.712	238.035	213.533	57.9809	99.5704	79.135	224.427	78.8954	1.50549	2.3219e-12	conserved hypothetical protein [Source:BROAD_F_oxysporum;Acc:FOXG_03764]
FOXG_05267	1192.73	1136.18	1219.39	720.747	770.841	703.994	1182.76	731.861	0.691746	2.37285e-12	hypothetical protein similar to TPR repeat protein [Source:BROAD_F_oxysporum;Acc:FOXG_05267]
FOXG_11264	1297.43	1374.21	1402.58	865.253	880.368	842.737	1358.07	862.786	0.653866	2.55986e-12	hypothetical protein similar to mitochondrial dicarboxylate carrier [Source:BROAD_F_oxysporum;Acc:FOXG_11264]
FOXG_05202	277.14	255.667	196.675	520.044	487.895	637.191	243.161	548.377	-1.17056	2.56131e-12	5-oxoprolinase [Source:BROAD_F_oxysporum;Acc:FOXG_05202]
novel.222	6.15867	3.30604	5.61929	56.1969	48.9555	75.0241	5.028	60.0588	-3.56923	2.58508e-12	-
FOXG_00064	624.079	570.843	572.044	927.694	1018.11	1070.89	588.989	1005.56	-0.770779	2.64383e-12	conserved hypothetical protein [Source:BROAD_F_oxysporum;Acc:FOXG_00064]
FOXG_11573	1924.58	1843.67	2100.49	3551.11	3307.4	2931.08	1956.25	3263.19	-0.738553	2.64911e-12	conserved hypothetical protein [Source:BROAD_F_oxysporum;Acc:FOXG_11573]
FOXG_13110	2222.25	2218.35	2245.47	1132.86	1140.08	1472.73	2228.69	1248.56	0.837022	2.68394e-12	hypothetical protein similar to amino acid permease [Source:BROAD_F_oxysporum;Acc:FOXG_13110]
FOXG_12917	674.374	639.168	525.966	1078.44	1132.61	1076.03	613.169	1095.7	-0.836918	2.70105e-12	conserved hypothetical protein [Source:BROAD_F_oxysporum;Acc:FOXG_12917]
FOXG_08539	1106.51	1119.65	972.138	1718.02	1669.46	1816	1066.1	1734.49	-0.701543	2.70608e-12	conserved hypothetical protein [Source:BROAD_F_oxysporum;Acc:FOXG_08539]
FOXG_07873	690.797	660.106	634.98	381.782	395.792	372.038	661.961	383.204	0.788197	2.70669e-12	conserved hypothetical protein [Source:BROAD_F_oxysporum;Acc:FOXG_07873]
FOXG_00537	13636.3	12817.5	12531	20220.2	18419.7	21311	12995	19983.6	-0.620777	2.77895e-12	Extracellular matrix protein [Source:UniProtKB/TrEMBL;Acc:Q8X199]
FOXG_13042	49.2694	44.0806	58.4406	1.78403	1.65951	5.13864	50.5969	2.86072	4.19914	2.78109e-12	conserved hypothetical protein [Source:BROAD_F_oxysporum;Acc:FOXG_13042]
FOXG_02317	171.416	147.67	129.244	508.448	404.92	303.18	149.443	405.516	-1.44022	2.82981e-12	ATP-dependent RNA helicase DRS1 [Source:BROAD_F_oxysporum;Acc:FOXG_02317]
FOXG_02260	408.525	500.314	423.695	874.173	830.583	752.297	444.178	819.018	-0.88385	2.83422e-12	hypothetical protein similar to MesA [Source:BROAD_F_oxysporum;Acc:FOXG_02260]
FOXG_04144	345.912	411.051	210.162	884.877	842.2	781.073	322.375	836.05	-1.37438	2.83659e-12	hypothetical protein similar to sulfate permease SutB [Source:BROAD_F_oxysporum;Acc:FOXG_04144]
FOXG_09293	231.977	250.157	229.267	547.696	505.32	414.174	237.134	489.064	-1.04593	2.88047e-12	conserved hypothetical protein [Source:BROAD_F_oxysporum;Acc:FOXG_09293]
FOXG_07112	72.8776	92.5692	73.0508	194.459	197.481	238.433	79.4992	210.124	-1.40102	3.10652e-12	conserved hypothetical protein [Source:BROAD_F_oxysporum;Acc:FOXG_07112]
FOXG_05512	154.993	141.058	162.959	361.265	292.073	351.483	153.003	334.941	-1.12913	3.11729e-12	conserved hypothetical protein [Source:BROAD_F_oxysporum;Acc:FOXG_05512]
FOXG_05717	140.623	134.446	135.987	295.256	273.819	344.289	137.019	304.455	-1.14931	3.12099e-12	predicted protein [Source:BROAD_F_oxysporum;Acc:FOXG_05717]
FOXG_10343	1581.75	1549.43	1453.15	2381.68	2270.21	2312.39	1528.11	2321.42	-0.603015	3.13941e-12	hypothetical protein similar to cell cycle control protein Cwf8 [Source:BROAD_F_oxysporum;Acc:FOXG_10343]
FOXG_09034	4257.69	4057.62	4303.25	1817.03	1769.03	2639.21	4206.19	2075.09	1.02003	3.16427e-12	conserved hypothetical protein [Source:BROAD_F_oxysporum;Acc:FOXG_09034]
FOXG_03683	909.43	763.696	849.637	1518.21	1523.43	1317.55	840.921	1453.06	-0.789276	3.17928e-12	conserved hypothetical protein [Source:BROAD_F_oxysporum;Acc:FOXG_03683]
FOXG_02144	381.838	366.971	336.034	614.597	649.697	724.548	361.614	662.947	-0.872862	3.27276e-12	conserved hypothetical protein [Source:BROAD_F_oxysporum;Acc:FOXG_02144]
FOXG_14925	676.427	743.859	649.59	409.434	389.154	360.732	689.959	386.44	0.835177	3.31442e-12	conserved hypothetical protein [Source:BROAD_F_oxysporum;Acc:FOXG_14925]
FOXG_06383	1192.73	1192.38	1336.27	721.639	748.438	791.35	1240.46	753.809	0.718943	3.35209e-12	mitochondria fission 1 protein [Source:BROAD_F_oxysporum;Acc:FOXG_06383]
FOXG_08788	141.649	127.834	129.244	269.388	326.093	418.285	132.909	337.922	-1.34355	3.39445e-12	conserved hypothetical protein [Source:BROAD_F_oxysporum;Acc:FOXG_08788]
FOXG_00853	114.962	127.834	139.358	39.2486	35.6794	44.1923	127.385	39.7068	1.68595	3.40101e-12	predicted protein [Source:BROAD_F_oxysporum;Acc:FOXG_00853]
FOXG_04309	145.755	132.242	125.872	49.0607	38.9984	43.1646	134.623	43.7412	1.624	3.42112e-12	hypothetical protein [Source:BROAD_F_oxysporum;Acc:FOXG_04309]
FOXG_12887	813.971	798.96	637.228	1470.04	1382.37	1261.02	750.053	1371.14	-0.870146	3.49571e-12	hypothetical protein similar to nuclear condensin complex subunit Smc4 [Source:BROAD_F_oxysporum;Acc:FOXG_12887]
FOXG_01581	5265.66	5373.42	5559.73	2887.45	2783.82	3639.18	5399.6	3103.49	0.799422	3.72142e-12	conserved hypothetical protein [Source:BROAD_F_oxysporum;Acc:FOXG_01581]
FOXG_14582	112.909	135.548	119.129	42.8167	34.8496	29.8041	122.529	35.8235	1.76874	3.78299e-12	conserved hypothetical protein [Source:BROAD_F_oxysporum;Acc:FOXG_14582]
novel.318	274.061	176.322	264.107	83.8493	80.4861	90.4401	238.163	84.9251	1.49016	3.81093e-12	-
FOXG_03287	1177.33	1135.07	999.11	1834.87	1751.61	1768.72	1103.84	1785.07	-0.693033	3.81264e-12	conserved hypothetical protein [Source:BROAD_F_oxysporum;Acc:FOXG_03287]
FOXG_01950	317.171	329.502	302.318	549.48	551.786	595.054	316.331	565.44	-0.83703	3.87853e-12	conserved hypothetical protein [Source:BROAD_F_oxysporum;Acc:FOXG_01950]
FOXG_04070	89.3007	95.8752	100.023	13.3802	17.4248	29.8041	95.0664	20.203	2.25223	4.03662e-12	conserved hypothetical protein [Source:BROAD_F_oxysporum;Acc:FOXG_04070]
FOXG_00536	13114.9	13464.4	13781.9	9601.63	9250.92	9623.64	13453.7	9492.07	0.503235	4.0702e-12	UTP-glucose-1-phosphate uridylyltransferase [Source:BROAD_F_oxysporum;Acc:FOXG_00536]
FOXG_04268	2985.93	2993.07	2990.59	1733.18	1716.76	2067.79	2989.86	1839.24	0.701699	4.09066e-12	phosphatidylserine decarboxylase proenzyme [Source:BROAD_F_oxysporum;Acc:FOXG_04268]
FOXG_10778	71.8511	66.1208	60.6884	0.892014	1.65951	0	66.2201	0.850507	6.19261	4.13164e-12	hypothetical protein similar to trehalose transporter [Source:BROAD_F_oxysporum;Acc:FOXG_10778]
FOXG_11206	372.6	384.603	309.061	652.954	661.314	639.247	355.421	651.171	-0.873031	4.25516e-12	conserved hypothetical protein [Source:BROAD_F_oxysporum;Acc:FOXG_11206]
novel.365	70.8247	62.8148	67.4315	12.4882	12.4463	9.24955	67.0237	11.3947	2.547	4.32644e-12	-
FOXG_17751	5110.67	4898.45	4637.04	7468.83	6945.87	7332.84	4882.05	7249.18	-0.570179	4.38554e-12	hypothetical protein [Source:BROAD_F_oxysporum;Acc:FOXG_17751]
FOXG_08371	49269.4	47688.6	52076.2	74009.5	87717.4	101903	49678	87876.7	-0.822863	4.51669e-12	hypothetical protein similar to multidrug resistant protein [Source:BROAD_F_oxysporum;Acc:FOXG_08371]
FOXG_02336	4597.45	4460.95	4613.44	2049.85	2422.05	2940.33	4557.28	2470.74	0.883676	4.53705e-12	conserved hypothetical protein [Source:BROAD_F_oxysporum;Acc:FOXG_02336]
FOXG_09315	166.284	177.424	167.455	66.009	64.7208	41.1091	170.388	57.2796	1.56352	4.55229e-12	conserved hypothetical protein [Source:BROAD_F_oxysporum;Acc:FOXG_09315]
novel.729	48.2429	41.8765	50.5736	147.182	128.612	150.048	46.8977	141.947	-1.59611	4.56369e-12	PF05225:helix-turn-helix, Psq domain|PF03184:DDE superfamily endonuclease|PF03221:Tc5 transposase DNA-binding domain
FOXG_08170	1781.91	1996.85	1980.24	1024.03	1110.21	1258.97	1919.67	1131.07	0.763772	4.59413e-12	hypothetical protein similar to peptidase family C54 protein [Source:BROAD_F_oxysporum;Acc:FOXG_08170]
FOXG_03241	3696.23	3486.77	3570.5	2501.21	2421.22	2291.83	3584.5	2404.75	0.575681	4.61004e-12	hypothetical protein similar to proteasome regulatory particle subunit RpnG [Source:BROAD_F_oxysporum;Acc:FOXG_03241]
FOXG_01289	233.003	300.85	223.648	505.772	492.874	567.306	252.5	521.984	-1.04717	4.62218e-12	pre-mRNA-splicing factor isy-1 [Source:BROAD_F_oxysporum;Acc:FOXG_01289]
FOXG_01869	1117.8	1115.24	1050.81	1654.69	1780.65	1660.81	1094.61	1698.71	-0.63414	4.74363e-12	hypothetical protein similar to Paf1 complex subunit/triple-helical DNA-binding protein Cdp1 [Source:BROAD_F_oxysporum;Acc:FOXG_01869]
FOXG_12684	268.929	261.177	203.418	680.606	607.38	450.145	244.508	579.377	-1.24498	4.83741e-12	pre-mRNA-splicing factor ATP-dependent RNA helicase PRP43 [Source:BROAD_F_oxysporum;Acc:FOXG_12684]
FOXG_00655	6756.06	6900.81	6526.25	10292.9	9908.09	9354.38	6727.71	9851.8	-0.550335	4.85859e-12	tubulin alpha-2B chain [Source:BROAD_F_oxysporum;Acc:FOXG_00655]
FOXG_12309	8289.57	9375.93	9429.17	14142.9	13258.6	15239.1	9031.56	14213.6	-0.654206	4.86171e-12	hypothetical protein [Source:BROAD_F_oxysporum;Acc:FOXG_12309]
FOXG_11047	423.922	396.725	382.112	665.442	743.459	854.042	400.92	754.314	-0.910354	4.87274e-12	conserved hypothetical protein [Source:BROAD_F_oxysporum;Acc:FOXG_11047]
FOXG_05550	2064.18	1849.18	1745.35	3025.71	3189.57	3888.92	1886.24	3368.07	-0.835868	4.89078e-12	conserved hypothetical protein [Source:BROAD_F_oxysporum;Acc:FOXG_05550]
FOXG_16415	329.489	381.297	282.089	645.818	648.867	614.581	330.958	636.422	-0.9434	4.93661e-12	conserved hypothetical protein [Source:BROAD_F_oxysporum;Acc:FOXG_16415]
novel.692	8615.98	9732.99	10455.3	15112.5	15643.3	14684.2	9601.41	15146.7	-0.657787	4.94766e-12	-
FOXG_01471	913.536	966.466	801.311	1411.17	1555.79	1651.56	893.771	1539.5	-0.783951	5.15779e-12	conserved hypothetical protein [Source:BROAD_F_oxysporum;Acc:FOXG_01471]
FOXG_05695	1814.75	1713.63	1837.51	907.178	1027.23	1170.58	1788.63	1035	0.79012	5.20924e-12	conserved hypothetical protein [Source:BROAD_F_oxysporum;Acc:FOXG_05695]
FOXG_09120	1814.75	1701.51	1597	996.379	1086.98	1098.64	1704.42	1060.67	0.68477	5.22679e-12	conserved hypothetical protein [Source:BROAD_F_oxysporum;Acc:FOXG_09120]
FOXG_09047	172.443	158.69	157.34	53.5208	62.2315	65.7746	162.824	60.509	1.43081	5.26629e-12	predicted protein [Source:BROAD_F_oxysporum;Acc:FOXG_09047]
FOXG_09219	572.756	720.717	530.461	1090.93	1139.25	1169.55	607.978	1133.25	-0.898327	5.31311e-12	conserved hypothetical protein [Source:BROAD_F_oxysporum;Acc:FOXG_09219]
FOXG_11350	288.431	321.788	328.167	533.424	581.657	588.888	312.795	567.99	-0.861254	5.35745e-12	conserved hypothetical protein [Source:BROAD_F_oxysporum;Acc:FOXG_11350]
FOXG_11370	134.464	136.65	128.12	41.0326	48.1257	45.22	133.078	44.7928	1.57022	5.38407e-12	conserved hypothetical protein [Source:BROAD_F_oxysporum;Acc:FOXG_11370]
FOXG_17108	142.676	133.344	138.235	309.529	288.754	432.673	138.085	343.652	-1.31242	5.64992e-12	conserved hypothetical protein [Source:BROAD_F_oxysporum;Acc:FOXG_17108]
FOXG_02018	1184.52	1402.86	1266.59	2401.3	2189.72	1984.54	1284.66	2191.85	-0.771312	5.73859e-12	conserved hypothetical protein [Source:BROAD_F_oxysporum;Acc:FOXG_02018]
FOXG_12882	724.67	940.018	903.582	2453.04	1959.88	1472.73	856.09	1961.88	-1.19712	5.85797e-12	endochitinase 1 precursor [Source:BROAD_F_oxysporum;Acc:FOXG_12882]
FOXG_03913	15.3967	18.7342	22.4772	113.286	89.6134	73.9964	18.8694	92.2985	-2.29701	6.00969e-12	conserved hypothetical protein [Source:BROAD_F_oxysporum;Acc:FOXG_03913]
FOXG_14639	91.3536	85.9571	104.519	7.13611	12.4463	26.7209	93.9432	15.4344	2.63185	6.11806e-12	predicted protein [Source:BROAD_F_oxysporum;Acc:FOXG_14639]
FOXG_15622	657.951	617.128	612.503	325.585	380.027	292.902	629.194	332.838	0.916227	6.12851e-12	conserved hypothetical protein [Source:BROAD_F_oxysporum;Acc:FOXG_15622]
FOXG_17750	15520.9	15265.1	14569.7	21856.1	20847.6	22071.5	15118.6	21591.7	-0.514107	6.19272e-12	hypothetical protein [Source:BROAD_F_oxysporum;Acc:FOXG_17750]
FOXG_03848	861.187	733.941	767.595	477.227	418.196	438.84	787.575	444.754	0.825077	6.43107e-12	conserved hypothetical protein [Source:BROAD_F_oxysporum;Acc:FOXG_03848]
FOXG_04348	97.5123	126.732	101.147	233.708	260.543	274.403	108.464	256.218	-1.24043	6.43236e-12	conserved hypothetical protein [Source:BROAD_F_oxysporum;Acc:FOXG_04348]
FOXG_00268	509.117	482.682	574.292	928.586	906.091	855.07	522.03	896.582	-0.781099	6.8275e-12	conserved hypothetical protein [Source:BROAD_F_oxysporum;Acc:FOXG_00268]
FOXG_03007	220.686	167.506	207.914	421.03	448.897	379.232	198.702	416.386	-1.0676	6.95104e-12	conserved hypothetical protein [Source:BROAD_F_oxysporum;Acc:FOXG_03007]
FOXG_05037	1966.67	1801.79	1971.25	3403.92	3581.22	5466.48	1913.24	4150.54	-1.11695	7.17453e-12	peroxisomal-coenzyme A synthetase [Source:BROAD_F_oxysporum;Acc:FOXG_05037]
FOXG_00851	874.531	802.266	830.532	1867.88	1536.7	1330.91	835.776	1578.5	-0.917677	7.31905e-12	multiple RNA-binding domain-containing protein 1 [Source:BROAD_F_oxysporum;Acc:FOXG_00851]
FOXG_11437	51.3222	38.5705	58.4406	0.892014	3.31901	4.11091	49.4445	2.77398	4.17535	7.33071e-12	predicted protein [Source:BROAD_F_oxysporum;Acc:FOXG_11437]
FOXG_06939	216.58	199.465	150.597	383.566	411.558	467.616	188.88	420.913	-1.15327	7.64545e-12	conserved hypothetical protein [Source:BROAD_F_oxysporum;Acc:FOXG_06939]
FOXG_07993	334.621	262.279	250.62	934.83	754.246	523.114	282.507	737.397	-1.38419	7.66294e-12	nucleolar protein 2 [Source:BROAD_F_oxysporum;Acc:FOXG_07993]
FOXG_05074	309.986	286.524	294.451	118.638	106.208	51.3864	296.987	92.0775	1.68201	7.78251e-12	predicted protein [Source:BROAD_F_oxysporum;Acc:FOXG_05074]
FOXG_01480	3004.4	3159.47	3206.37	2106.94	2037.87	1789.27	3123.42	1978.03	0.658448	7.79638e-12	conserved hypothetical protein [Source:BROAD_F_oxysporum;Acc:FOXG_01480]
FOXG_00424	581.994	556.517	554.062	288.12	302.03	344.289	564.191	311.48	0.859334	7.91423e-12	conserved hypothetical protein [Source:BROAD_F_oxysporum;Acc:FOXG_00424]
FOXG_00903	636.396	547.701	610.255	1136.43	1256.25	952.704	598.117	1115.13	-0.899424	7.98305e-12	hypothetical protein similar to transcription/RNA-processing factor Ssu72 [Source:BROAD_F_oxysporum;Acc:FOXG_00903]
novel.20	57.4809	48.4886	57.3168	8.92014	2.48926	4.11091	54.4288	5.17344	3.3987	8.35952e-12	-
FOXG_03275	1927.66	1872.32	1684.66	2792.89	2909.95	2759.45	1828.22	2820.76	-0.625542	8.38069e-12	conserved hypothetical protein [Source:BROAD_F_oxysporum;Acc:FOXG_03275]
FOXG_14695	4.10578	13.2242	10.1147	64.225	66.3803	69.8855	9.14822	66.8303	-2.88151	8.51209e-12	Endopolygalacturonase [Source:UniProtKB/TrEMBL;Acc:Q14TY6]
FOXG_08118	5074.74	6667.18	6988.15	18474.5	15217.7	10511.6	6243.36	14734.6	-1.23892	8.59811e-12	metacaspase-1 precursor [Source:BROAD_F_oxysporum;Acc:FOXG_08118]
FOXG_11125	2228.41	2243.7	2276.94	1321.96	1464.51	1538.51	2249.68	1441.66	0.64237	8.64448e-12	conserved hypothetical protein [Source:BROAD_F_oxysporum;Acc:FOXG_11125]
FOXG_09476	9778.94	9201.82	9361.74	14632.6	13277.7	15762.3	9447.5	14557.5	-0.623644	8.82759e-12	conserved hypothetical protein [Source:BROAD_F_oxysporum;Acc:FOXG_09476]
FOXG_01609	852.976	781.328	668.696	1397.79	1309.35	1288.77	767.666	1331.97	-0.794442	8.95909e-12	conserved hypothetical protein [Source:BROAD_F_oxysporum;Acc:FOXG_01609]
FOXG_04228	1167.07	1262.91	1225.01	776.944	752.586	795.461	1218.33	774.997	0.652929	9.55965e-12	WD repeat-containing protein srw1 [Source:BROAD_F_oxysporum;Acc:FOXG_04228]
FOXG_04269	2569.19	2622.79	2673.66	1632.38	1666.97	1844.77	2621.88	1714.71	0.613144	9.5878e-12	hypothetical protein [Source:BROAD_F_oxysporum;Acc:FOXG_04269]
FOXG_10654	519.381	524.559	463.03	875.957	804.031	935.232	502.323	871.74	-0.79401	9.76104e-12	conserved hypothetical protein [Source:BROAD_F_oxysporum;Acc:FOXG_10654]
FOXG_01025	1596.12	1453.56	1456.52	2205.95	2338.25	2373.02	1502.07	2305.74	-0.617887	9.87089e-12	hypothetical protein similar to serine/threonine protein kinase Kin4 [Source:BROAD_F_oxysporum;Acc:FOXG_01025]
FOXG_07700	225.818	254.565	211.285	418.354	443.918	484.06	230.556	448.777	-0.95993	1.03271e-11	conserved hypothetical protein [Source:BROAD_F_oxysporum;Acc:FOXG_07700]
FOXG_05042	386.97	393.419	388.855	150.75	176.737	218.906	389.748	182.131	1.10131	1.08052e-11	predicted protein [Source:BROAD_F_oxysporum;Acc:FOXG_05042]
FOXG_08670	58.5074	91.4672	77.5462	15.1642	14.9356	11.305	75.8403	13.8016	2.44815	1.11957e-11	conserved hypothetical protein [Source:BROAD_F_oxysporum;Acc:FOXG_08670]
FOXG_10951	113.935	105.793	125.872	25.8684	29.0414	42.1368	115.2	32.3489	1.84312	1.13025e-11	conserved hypothetical protein [Source:BROAD_F_oxysporum;Acc:FOXG_10951]
FOXG_01021	282.272	319.584	236.01	583.377	543.489	520.03	279.289	548.965	-0.974919	1.1622e-11	conserved hypothetical protein [Source:BROAD_F_oxysporum;Acc:FOXG_01021]
FOXG_00254	461.9	429.785	463.03	1022.25	848.838	740.992	451.572	870.692	-0.947883	1.19016e-11	TGF-beta-inducible nuclear protein 1 [Source:BROAD_F_oxysporum;Acc:FOXG_00254]
FOXG_04292	395.181	348.236	412.456	175.727	172.589	102.773	385.291	150.363	1.35211	1.1978e-11	conserved hypothetical protein [Source:BROAD_F_oxysporum;Acc:FOXG_04292]
FOXG_02437	526.566	468.356	483.259	240.844	289.584	248.71	492.727	259.713	0.922593	1.23165e-11	conserved hypothetical protein [Source:BROAD_F_oxysporum;Acc:FOXG_02437]
FOXG_12210	781.125	705.289	730.508	463.847	409.068	413.147	738.974	428.687	0.785704	1.27253e-11	predicted protein [Source:BROAD_F_oxysporum;Acc:FOXG_12210]
FOXG_15382	51.3222	46.2846	55.0691	2.67604	7.46778	2.05546	50.892	4.06643	3.60104	1.31129e-11	conserved hypothetical protein [Source:BROAD_F_oxysporum;Acc:FOXG_15382]
FOXG_06035	62.6131	53.9987	46.0782	0	0	0	54.23	0	8.33652	1.33749e-11	conserved hypothetical protein [Source:BROAD_F_oxysporum;Acc:FOXG_06035]
FOXG_09676	112.909	107.997	129.244	34.7885	39.8282	32.8873	116.717	35.8347	1.69857	1.35992e-11	conserved hypothetical protein [Source:BROAD_F_oxysporum;Acc:FOXG_09676]
FOXG_10476	1884.55	1833.75	1668.93	3419.09	3194.55	2657.7	1795.74	3090.45	-0.783434	1.37428e-11	hypothetical protein similar to eukaryotic translation initiation factor 3 subunit EifCl [Source:BROAD_F_oxysporum;Acc:FOXG_10476]
FOXG_05219	1055.19	944.426	896.839	1502.15	1595.62	1752.28	965.483	1616.68	-0.742806	1.37661e-11	conserved hypothetical protein [Source:BROAD_F_oxysporum;Acc:FOXG_05219]
FOXG_08967	244.294	231.423	247.249	103.474	120.314	92.4955	240.989	105.428	1.18805	1.40754e-11	conserved hypothetical protein [Source:BROAD_F_oxysporum;Acc:FOXG_08967]
FOXG_13647	276.114	317.38	298.946	128.45	112.017	61.6637	297.48	100.71	1.55553	1.42396e-11	conserved hypothetical protein [Source:BROAD_F_oxysporum;Acc:FOXG_13647]
FOXG_08428	2633.86	2558.88	2736.6	1083.8	1191.53	1670.06	2643.11	1315.13	1.00798	1.43859e-11	conserved hypothetical protein [Source:BROAD_F_oxysporum;Acc:FOXG_08428]
FOXG_09307	914.562	969.772	949.661	588.729	609.039	571.417	944.665	589.728	0.678894	1.48177e-11	conserved hypothetical protein [Source:BROAD_F_oxysporum;Acc:FOXG_09307]
FOXG_03723	5955.43	5414.19	4964.08	9160.09	8183.03	10203.3	5444.57	9182.13	-0.753795	1.48656e-11	conserved hypothetical protein [Source:BROAD_F_oxysporum;Acc:FOXG_03723]
FOXG_00708	131.385	105.793	97.7757	34.7885	31.5306	29.8041	111.651	32.0411	1.80069	1.5095e-11	conserved hypothetical protein [Source:BROAD_F_oxysporum;Acc:FOXG_00708]
FOXG_16837	353.097	263.381	352.892	749.291	677.909	1265.13	323.123	897.444	-1.47238	1.54033e-11	conserved hypothetical protein [Source:BROAD_F_oxysporum;Acc:FOXG_16837]
FOXG_08425	762.649	794.552	731.632	1604.73	1302.71	1218.89	762.944	1375.44	-0.850581	1.55234e-11	conserved hypothetical protein [Source:BROAD_F_oxysporum;Acc:FOXG_08425]
FOXG_13591	62.6131	51.7947	83.1655	7.13611	12.4463	9.24955	65.8578	9.61065	2.76824	1.57403e-11	conserved hypothetical protein [Source:BROAD_F_oxysporum;Acc:FOXG_13591]
FOXG_05491	8994.74	8772.03	9027.96	6323.48	6462.95	5964.93	8931.57	6250.46	0.514806	1.59601e-11	hypothetical protein similar to outer mitochondrial membrane protein porin [Source:BROAD_F_oxysporum;Acc:FOXG_05491]
FOXG_09458	184.76	188.444	182.065	353.237	371.73	489.198	185.09	404.722	-1.12653	1.59608e-11	hypothetical protein [Source:BROAD_F_oxysporum;Acc:FOXG_09458]
FOXG_01164	787.283	764.798	696.792	1169.43	1191.53	1232.25	749.624	1197.73	-0.675371	1.61419e-11	conserved hypothetical protein [Source:BROAD_F_oxysporum;Acc:FOXG_01164]
FOXG_15681	54.4016	58.4067	76.4224	12.4882	4.97852	8.22182	63.0769	8.56284	2.88693	1.63225e-11	hypothetical protein similar to MFS peptide transporter [Source:BROAD_F_oxysporum;Acc:FOXG_15681]
FOXG_10793	56.4545	38.5705	50.5736	3.56805	3.31901	5.13864	48.5329	4.00857	3.61739	1.64499e-11	conserved hypothetical protein [Source:BROAD_F_oxysporum;Acc:FOXG_10793]
FOXG_05008	241.215	299.748	320.3	125.774	112.017	70.9132	287.087	102.901	1.47359	1.6865e-11	conserved hypothetical protein [Source:BROAD_F_oxysporum;Acc:FOXG_05008]
FOXG_16445	3627.46	3868.07	3768.3	5810.58	5580.09	6926.89	3754.61	6105.85	-0.701334	1.72553e-11	predicted protein [Source:BROAD_F_oxysporum;Acc:FOXG_16445]
FOXG_10701	214.527	182.934	193.304	41.9246	67.21	83.246	196.922	64.1269	1.62496	1.73473e-11	predicted protein [Source:BROAD_F_oxysporum;Acc:FOXG_10701]
FOXG_06428	800.627	791.246	784.453	1321.07	1224.72	1560.09	792.109	1368.63	-0.787959	1.73917e-11	conserved hypothetical protein [Source:BROAD_F_oxysporum;Acc:FOXG_06428]
FOXG_01838	328.462	370.277	356.263	189.999	178.397	160.326	351.667	176.24	0.994116	1.75265e-11	conserved hypothetical protein [Source:BROAD_F_oxysporum;Acc:FOXG_01838]
FOXG_10289	5329.3	5097.92	5050.62	3496.69	3504.05	3717.29	5159.28	3572.68	0.530424	1.79855e-11	vacuolar protein sorting-associated protein 35 [Source:BROAD_F_oxysporum;Acc:FOXG_10289]
FOXG_05532	3828.64	3903.33	3719.97	5714.24	5566.82	5279.44	3817.31	5520.16	-0.532257	1.80743e-11	hypothetical protein similar to glutamate carboxypeptidase [Source:BROAD_F_oxysporum;Acc:FOXG_05532]
FOXG_17251	57.4809	78.243	60.6884	207.839	156.823	184.991	65.4708	183.218	-1.4851	1.84744e-11	predicted protein [Source:BROAD_F_oxysporum;Acc:FOXG_17251]
FOXG_03806	100.592	117.915	98.8996	28.5444	31.5306	32.8873	105.802	30.9875	1.77311	1.84868e-11	conserved hypothetical protein [Source:BROAD_F_oxysporum;Acc:FOXG_03806]
FOXG_12849	410.578	351.542	378.74	194.459	196.652	202.462	380.287	197.858	0.943765	1.87259e-11	conserved hypothetical protein [Source:BROAD_F_oxysporum;Acc:FOXG_12849]
FOXG_15897	165.258	152.078	140.482	58.8729	46.4662	59.6082	152.606	54.9824	1.47827	1.8787e-11	predicted protein [Source:BROAD_F_oxysporum;Acc:FOXG_15897]
FOXG_15451	270.981	321.788	293.327	140.046	149.356	133.605	295.366	141.002	1.06431	1.88779e-11	predicted protein [Source:BROAD_F_oxysporum;Acc:FOXG_15451]
FOXG_09215	767.781	763.696	752.985	482.579	463.002	425.479	761.487	457.02	0.735451	1.89124e-11	hypothetical protein similar to SAGA complex subunit Ada2 [Source:BROAD_F_oxysporum;Acc:FOXG_09215]
FOXG_09478	152.94	127.834	119.129	331.829	272.159	289.819	133.301	297.936	-1.15812	1.98047e-11	conserved hypothetical protein [Source:BROAD_F_oxysporum;Acc:FOXG_09478]
FOXG_03104	462.927	436.398	412.456	728.775	760.884	714.271	437.26	734.643	-0.748367	2.00947e-11	hypothetical protein similar to D-arabinono-1,4-lactone oxidase [Source:BROAD_F_oxysporum;Acc:FOXG_03104]
FOXG_04754	1947.17	1840.36	1952.14	3128.29	3221.1	4400.73	1913.22	3583.38	-0.904911	2.03319e-11	conserved hypothetical protein [Source:BROAD_F_oxysporum;Acc:FOXG_04754]
FOXG_08302	4658.01	4508.34	4324.61	6528.65	6955.82	7995.72	4496.98	7160.06	-0.670798	2.03552e-11	conserved hypothetical protein [Source:BROAD_F_oxysporum;Acc:FOXG_08302]
FOXG_05770	1150.64	1159.32	1196.91	647.602	674.59	784.156	1168.96	702.116	0.736756	2.04629e-11	hypothetical protein similar to adenylate kinase 2 [Source:BROAD_F_oxysporum;Acc:FOXG_05770]
FOXG_08618	1809.62	1559.35	1501.48	2718.86	2907.46	3904.34	1623.48	3176.88	-0.96795	2.09834e-11	conserved hypothetical protein [Source:BROAD_F_oxysporum;Acc:FOXG_08618]
FOXG_08970	149.861	196.158	131.491	60.6569	47.2959	42.1368	159.17	50.0299	1.6664	2.12588e-11	conserved hypothetical protein [Source:BROAD_F_oxysporum;Acc:FOXG_08970]
FOXG_11385	400.314	411.051	402.341	234.6	209.098	197.324	404.569	213.674	0.919552	2.13813e-11	3-ketoacyl-CoA thiolase [Source:BROAD_F_oxysporum;Acc:FOXG_11385]
FOXG_08515	6378.33	5634.6	6316.09	2565.43	2844.39	3900.23	6109.67	3103.35	0.977683	2.17389e-11	conserved hypothetical protein [Source:BROAD_F_oxysporum;Acc:FOXG_08515]
FOXG_03232	151.914	169.71	144.978	66.901	44.8067	46.2478	155.534	52.6518	1.56138	2.26532e-11	hypothetical protein similar to 2-nitropropane dioxygenase [Source:BROAD_F_oxysporum;Acc:FOXG_03232]
novel.663	35.9256	36.3665	32.5919	122.206	119.484	102.773	34.9613	114.821	-1.71665	2.26722e-11	-
FOXG_08672	384.917	349.338	389.979	164.13	210.757	176.769	374.745	183.886	1.02509	2.30623e-11	predicted protein [Source:BROAD_F_oxysporum;Acc:FOXG_08672]
FOXG_01655	403.393	347.134	312.433	648.494	657.165	634.108	354.32	646.589	-0.866661	2.31183e-11	hypothetical protein similar to kinesin family protein [Source:BROAD_F_oxysporum;Acc:FOXG_01655]
FOXG_04347	547.095	476.07	539.452	817.084	962.514	991.757	520.872	923.785	-0.826022	2.36299e-11	hypothetical protein similar to sterol o-acyltransferase [Source:BROAD_F_oxysporum;Acc:FOXG_04347]
FOXG_05565	6079.63	6829.18	6657.74	9593.61	9562.08	9385.21	6522.18	9513.63	-0.544749	2.3996e-11	fimbrin [Source:BROAD_F_oxysporum;Acc:FOXG_05565]
novel.46	68.7718	91.4672	103.395	20.5163	20.7438	19.5268	87.878	20.2623	2.11302	2.40876e-11	-
FOXG_05345	369.52	373.583	382.112	655.63	609.039	635.136	375.072	633.268	-0.755596	2.4315e-11	tubulin gamma chain [Source:BROAD_F_oxysporum;Acc:FOXG_05345]
FOXG_11831	14897.8	15475.6	15847.5	23383.2	21001.1	22959.4	15407	22447.9	-0.542986	2.44229e-11	conserved hypothetical protein [Source:BROAD_F_oxysporum;Acc:FOXG_11831]
FOXG_13741	243.267	219.301	220.276	465.631	460.513	390.537	227.615	438.894	-0.947965	2.52386e-11	conserved hypothetical protein [Source:BROAD_F_oxysporum;Acc:FOXG_13741]
FOXG_04515	140.623	158.69	119.129	48.1687	50.615	36.9982	139.481	45.2606	1.61724	2.54599e-11	conserved hypothetical protein [Source:BROAD_F_oxysporum;Acc:FOXG_04515]
FOXG_15416	416.737	415.459	333.786	750.183	665.462	717.354	388.661	711	-0.870219	2.57803e-11	hypothetical protein similar to DNA mismatch repair protein msh6 [Source:BROAD_F_oxysporum;Acc:FOXG_15416]
FOXG_12685	161.152	147.67	158.464	51.7368	61.4018	63.7191	155.762	58.9526	1.40373	2.58518e-11	predicted protein [Source:BROAD_F_oxysporum;Acc:FOXG_12685]
FOXG_00018	233.003	223.709	231.515	512.016	497.022	385.398	229.409	464.812	-1.02043	2.61016e-11	conserved hypothetical protein [Source:BROAD_F_oxysporum;Acc:FOXG_00018]
FOXG_17770	202.21	159.792	162.959	537.884	443.088	327.845	174.987	436.273	-1.31822	2.6618e-11	hypothetical protein [Source:BROAD_F_oxysporum;Acc:FOXG_17770]
FOXG_08390	12655	12017.5	11988.2	6633.01	7439.57	8494.17	12220.2	7522.25	0.700197	2.72159e-11	hypothetical protein similar to dihydroorotate reductase PyrE [Source:BROAD_F_oxysporum;Acc:FOXG_08390]
FOXG_03335	845.791	816.592	856.38	1311.26	1266.2	1462.46	839.588	1346.64	-0.680844	2.73646e-11	palmitoyltransferase ERF2 [Source:BROAD_F_oxysporum;Acc:FOXG_03335]
FOXG_09260	382.864	335.012	333.786	784.972	739.31	571.417	350.554	698.566	-0.995384	2.74166e-11	DNA-directed RNA polymerase I polypeptide 2 [Source:BROAD_F_oxysporum;Acc:FOXG_09260]
FOXG_03515	118764	113418	115411	167619	164276	155903	115864	162600	-0.488888	2.76875e-11	Translation elongation factor EF1 alpha [Source:UniProtKB/TrEMBL;Acc:Q64F06]
FOXG_05400	482.429	474.968	486.631	239.06	270.5	284.681	481.343	264.747	0.863667	2.83071e-11	conserved hypothetical protein [Source:BROAD_F_oxysporum;Acc:FOXG_05400]
FOXG_00636	36653.3	31513.2	31381.5	52844.7	48377.9	55271.2	33182.7	52164.6	-0.652606	2.87891e-11	conserved hypothetical protein [Source:BROAD_F_oxysporum;Acc:FOXG_00636]
FOXG_05474	1567.38	1668.45	1425.05	2476.23	2469.35	3037.96	1553.63	2661.18	-0.775904	2.8856e-11	conserved hypothetical protein [Source:BROAD_F_oxysporum;Acc:FOXG_05474]
FOXG_10475	982.308	1051.32	996.863	635.114	572.53	653.635	1010.16	620.426	0.704278	2.90791e-11	conserved hypothetical protein [Source:BROAD_F_oxysporum;Acc:FOXG_10475]
FOXG_01458	138.57	103.589	106.767	244.412	313.647	423.424	116.309	327.161	-1.48843	2.93725e-11	conserved hypothetical protein [Source:BROAD_F_oxysporum;Acc:FOXG_01458]
FOXG_17616	46.19	49.5906	55.0691	0	2.48926	1.02773	50.2832	1.17233	5.37854	2.99486e-11	predicted protein [Source:BROAD_F_oxysporum;Acc:FOXG_17616]
FOXG_11200	288.431	310.768	288.832	512.908	531.042	508.725	296.01	517.558	-0.806655	2.99701e-11	conserved hypothetical protein [Source:BROAD_F_oxysporum;Acc:FOXG_11200]
FOXG_02062	119.068	99.1813	104.519	327.369	262.202	219.934	107.589	269.835	-1.32693	3.01053e-11	predicted protein [Source:BROAD_F_oxysporum;Acc:FOXG_02062]
FOXG_03925	265.849	361.461	388.855	141.83	121.144	69.8855	338.722	110.953	1.6041	3.07068e-11	conserved hypothetical protein [Source:BROAD_F_oxysporum;Acc:FOXG_03925]
FOXG_12374	139.597	109.099	124.748	29.4364	40.6579	44.1923	124.481	38.0956	1.71286	3.09783e-11	conserved hypothetical protein [Source:BROAD_F_oxysporum;Acc:FOXG_12374]
FOXG_15348	1268.69	1297.07	1309.3	1941.91	1915.07	1863.27	1291.68	1906.75	-0.562148	3.14249e-11	conserved hypothetical protein [Source:BROAD_F_oxysporum;Acc:FOXG_15348]
FOXG_05990	695.93	716.309	701.288	1141.78	1059.6	1101.72	704.509	1101.03	-0.644079	3.19053e-11	hypothetical protein [Source:BROAD_F_oxysporum;Acc:FOXG_05990]
FOXG_03980	834.5	1067.85	1086.77	518.26	416.536	280.57	996.374	405.122	1.29625	3.24815e-11	conserved hypothetical protein [Source:BROAD_F_oxysporum;Acc:FOXG_03980]
FOXG_03102	1201.97	1116.34	1126.11	1955.29	1730.87	1731.72	1148.14	1805.96	-0.653355	3.31148e-11	hypothetical protein similar to MADS box protein [Source:BROAD_F_oxysporum;Acc:FOXG_03102]
FOXG_02820	73.904	52.8967	46.0782	173.051	151.845	178.825	57.6263	167.907	-1.53679	3.33615e-11	conserved hypothetical protein [Source:BROAD_F_oxysporum;Acc:FOXG_02820]
FOXG_01274	1464.74	1297.07	1318.29	2251.44	2614.55	3646.38	1360.03	2837.46	-1.06043	3.64987e-11	conserved hypothetical protein [Source:BROAD_F_oxysporum;Acc:FOXG_01274]
FOXG_04910	1346.7	1297.07	1225.01	1900.88	1930.01	2006.12	1289.59	1945.67	-0.59287	3.69431e-11	conserved hypothetical protein [Source:BROAD_F_oxysporum;Acc:FOXG_04910]
FOXG_11135	164.231	198.363	157.34	60.6569	62.2315	75.0241	173.311	65.9709	1.39767	3.69519e-11	hypothetical protein similar to hormone-sensitive lipase [Source:BROAD_F_oxysporum;Acc:FOXG_11135]
FOXG_13834	858.108	774.716	738.375	1348.72	1420.54	1203.47	790.4	1324.24	-0.744701	3.76574e-11	conserved hypothetical protein [Source:BROAD_F_oxysporum;Acc:FOXG_13834]
FOXG_02181	2249.97	2301.01	2164.55	3213.03	3182.1	3366.84	2238.51	3253.99	-0.539434	3.8336e-11	conserved hypothetical protein [Source:BROAD_F_oxysporum;Acc:FOXG_02181]
FOXG_02246	2688.26	3053.68	2911.92	4163.03	4338.78	4407.93	2884.62	4303.24	-0.577147	3.83873e-11	conserved hypothetical protein [Source:BROAD_F_oxysporum;Acc:FOXG_02246]
FOXG_11404	83.142	98.0792	83.1655	190.891	224.033	295.986	88.1289	236.97	-1.42491	3.92119e-11	conserved hypothetical protein [Source:BROAD_F_oxysporum;Acc:FOXG_11404]
FOXG_08435	224.791	215.995	227.019	82.9573	110.357	95.5787	222.602	96.2977	1.20695	3.93113e-11	conserved hypothetical protein [Source:BROAD_F_oxysporum;Acc:FOXG_08435]
FOXG_15768	74.9305	82.651	74.1747	14.2722	14.1058	22.61	77.2521	16.996	2.19967	4.01754e-11	conserved hypothetical protein [Source:BROAD_F_oxysporum;Acc:FOXG_15768]
FOXG_01333	63.6396	78.243	93.2803	12.4882	20.7438	12.3327	78.3876	15.1883	2.3528	4.07414e-11	predicted protein [Source:BROAD_F_oxysporum;Acc:FOXG_01333]
FOXG_05778	70.8247	71.6309	65.1838	12.4882	14.1058	16.4436	69.2131	14.3459	2.27684	4.07701e-11	hypothetical protein similar to peptidase U34 [Source:BROAD_F_oxysporum;Acc:FOXG_05778]
FOXG_08546	468.059	407.745	482.135	892.014	794.904	736.881	452.646	807.933	-0.836335	4.15629e-11	orotate phosphoribosyltransferase [Source:BROAD_F_oxysporum;Acc:FOXG_08546]
FOXG_04212	606.629	619.332	622.618	1209.57	958.365	1029.78	616.193	1065.91	-0.790647	4.19506e-11	DNA replication licensing factor mcm3 [Source:BROAD_F_oxysporum;Acc:FOXG_04212]
FOXG_01870	768.807	849.653	792.32	1484.31	1249.61	1273.35	803.593	1335.76	-0.733408	4.24733e-11	hypothetical protein similar to NADH-cytochrome B5 reductase [Source:BROAD_F_oxysporum;Acc:FOXG_01870]
FOXG_03032	309.986	357.053	304.566	580.701	546.808	627.942	323.868	585.15	-0.8526	4.26925e-11	conserved hypothetical protein [Source:BROAD_F_oxysporum;Acc:FOXG_03032]
FOXG_01512	750.331	759.288	745.118	1149.81	1302.71	1533.37	751.579	1328.63	-0.821201	4.31527e-11	hypothetical protein similar to glutamine-dependent NAD(+) synthetase [Source:BROAD_F_oxysporum;Acc:FOXG_01512]
FOXG_02191	395.181	530.069	459.658	874.173	901.112	785.184	461.636	853.49	-0.88809	4.33376e-11	hypothetical protein similar to 3-oxoacyl-[acyl-carrier-protein]-synthase [Source:BROAD_F_oxysporum;Acc:FOXG_02191]
FOXG_13909	159.099	161.996	150.597	70.4691	48.9555	49.3309	157.231	56.2518	1.48151	4.42883e-11	conserved hypothetical protein [Source:BROAD_F_oxysporum;Acc:FOXG_13909]
FOXG_01472	4592.31	4519.36	4846.08	6500.99	6580.77	6694.62	4652.58	6592.13	-0.50272	4.45564e-11	protein yop-1 [Source:BROAD_F_oxysporum;Acc:FOXG_01472]
FOXG_08605	295.616	306.36	259.611	771.592	682.887	482.004	287.196	645.494	-1.16937	4.49979e-11	conserved hypothetical protein [Source:BROAD_F_oxysporum;Acc:FOXG_08605]
FOXG_03637	714.406	586.271	611.379	217.651	239.799	361.76	637.352	273.07	1.22664	4.51444e-11	hypothetical protein similar to caleosin domain protein [Source:BROAD_F_oxysporum;Acc:FOXG_03637]
FOXG_10310	200.157	154.282	173.074	506.664	438.11	321.679	175.838	422.151	-1.26407	4.75704e-11	conserved hypothetical protein [Source:BROAD_F_oxysporum;Acc:FOXG_10310]
FOXG_06273	883.769	894.835	896.839	575.349	533.531	462.478	891.815	523.786	0.766187	4.81366e-11	methylenetetrahydrofolate reductase 1 [Source:BROAD_F_oxysporum;Acc:FOXG_06273]
FOXG_00870	89.3007	98.0792	76.4224	193.567	220.714	210.684	87.9341	208.322	-1.24383	4.87114e-11	conserved hypothetical protein [Source:BROAD_F_oxysporum;Acc:FOXG_00870]
FOXG_17758	346.938	381.297	350.644	578.025	656.335	716.326	359.626	650.229	-0.85382	4.88524e-11	hypothetical protein [Source:BROAD_F_oxysporum;Acc:FOXG_17758]
FOXG_08852	523.487	481.58	500.117	834.033	780.798	898.234	501.728	837.688	-0.738233	4.88652e-11	conserved hypothetical protein [Source:BROAD_F_oxysporum;Acc:FOXG_08852]
FOXG_12048	40.0314	46.2846	53.9452	2.67604	0.829753	6.16637	46.7537	3.22405	3.92399	5.13394e-11	conserved hypothetical protein [Source:BROAD_F_oxysporum;Acc:FOXG_12048]
FOXG_03088	128.306	160.894	149.473	338.073	312.817	279.542	146.224	310.144	-1.08744	5.15616e-11	hypothetical protein similar to Sep4b [Source:BROAD_F_oxysporum;Acc:FOXG_03088]
FOXG_08204	273.034	235.831	287.708	500.42	471.3	487.143	265.524	486.288	-0.872731	5.16867e-11	conserved hypothetical protein [Source:BROAD_F_oxysporum;Acc:FOXG_08204]
FOXG_00717	1739.82	1861.3	1842	2734.91	2683.42	2572.4	1814.38	2663.58	-0.554249	5.36942e-11	conserved hypothetical protein [Source:BROAD_F_oxysporum;Acc:FOXG_00717]
FOXG_00256	797.548	767.002	752.985	1452.2	1334.24	1146.94	772.512	1311.13	-0.763696	5.3957e-11	hypothetical protein similar to N-acetylglucosamine-phosphate mutase [Source:BROAD_F_oxysporum;Acc:FOXG_00256]
FOXG_11269	475.244	467.254	436.057	724.315	778.309	863.291	459.518	788.638	-0.778016	5.45907e-11	conserved hypothetical protein [Source:BROAD_F_oxysporum;Acc:FOXG_11269]
FOXG_01704	215.553	227.015	166.331	485.255	415.706	387.453	202.966	429.472	-1.08105	5.46891e-11	conserved hypothetical protein [Source:BROAD_F_oxysporum;Acc:FOXG_01704]
FOXG_03685	1837.34	1722.45	1935.28	2984.68	3071.75	4198.27	1831.69	3418.23	-0.899704	5.67723e-11	conserved hypothetical protein [Source:BROAD_F_oxysporum;Acc:FOXG_03685]
FOXG_01829	353.097	272.197	221.4	809.056	734.332	528.252	282.232	690.547	-1.29041	5.81128e-11	conserved hypothetical protein [Source:BROAD_F_oxysporum;Acc:FOXG_01829]
FOXG_04085	2407.01	2332.96	2345.49	1622.57	1665.32	1539.54	2361.82	1609.14	0.553214	5.81182e-11	NADH dehydrogenase iron-sulfur protein 8, mitochondrial precursor [Source:BROAD_F_oxysporum;Acc:FOXG_04085]
FOXG_00603	2387.51	2156.64	2113.98	3399.46	3455.09	4190.05	2219.38	3681.53	-0.729658	5.86183e-11	conserved hypothetical protein [Source:BROAD_F_oxysporum;Acc:FOXG_00603]
FOXG_00557	880.69	892.631	887.848	1368.35	1349.18	1300.08	887.056	1339.2	-0.594602	5.97461e-11	conserved hypothetical protein [Source:BROAD_F_oxysporum;Acc:FOXG_00557]
FOXG_07861	1157.83	1352.17	1175.56	708.259	738.481	792.378	1228.52	746.373	0.719443	6.04629e-11	conserved hypothetical protein [Source:BROAD_F_oxysporum;Acc:FOXG_07861]
FOXG_09254	4380.87	4117.12	4040.27	5982.73	5941.03	6556.9	4179.42	6160.22	-0.559423	6.5374e-11	conserved hypothetical protein [Source:BROAD_F_oxysporum;Acc:FOXG_09254]
FOXG_05286	161.152	159.792	129.244	52.6288	61.4018	46.2478	150.063	53.4261	1.48501	6.54668e-11	conserved hypothetical protein [Source:BROAD_F_oxysporum;Acc:FOXG_05286]
FOXG_13393	27.714	18.7342	13.4863	82.9573	105.379	83.246	19.9782	90.5273	-2.17326	6.7219e-11	predicted protein [Source:BROAD_F_oxysporum;Acc:FOXG_13393]
FOXG_12291	55.428	47.3866	60.6884	8.02812	6.63803	9.24955	54.501	7.9719	2.78395	6.7548e-11	hypothetical protein similar to urea transporter Dur3 [Source:BROAD_F_oxysporum;Acc:FOXG_12291]
FOXG_08309	460.874	387.909	425.942	800.136	703.631	715.299	424.908	739.689	-0.799222	6.83674e-11	DNA-directed RNA polymerases I [Source:BROAD_F_oxysporum;Acc:FOXG_08309]
FOXG_01459	1412.39	1440.33	1489.11	2475.34	2276.01	2068.82	1447.28	2273.39	-0.651981	7.06951e-11	hypothetical protein similar to RhoGAP and Fes/CIP4 domain protein [Source:BROAD_F_oxysporum;Acc:FOXG_01459]
FOXG_06212	510.143	590.679	546.195	914.314	969.152	858.153	549.006	913.873	-0.736374	7.16821e-11	hypothetical protein similar to tubulin-tyrosine ligase family protein [Source:BROAD_F_oxysporum;Acc:FOXG_06212]
FOXG_08265	179.628	134.446	142.73	440.655	410.728	282.625	152.268	378.003	-1.31214	7.22884e-11	hypothetical protein similar to ribosome biogenesis protein Bms1 [Source:BROAD_F_oxysporum;Acc:FOXG_08265]
FOXG_01675	517.328	533.375	506.86	1020.46	888.666	804.711	519.188	904.613	-0.801729	7.30355e-11	hypothetical protein similar to PQ loop repeat protein [Source:BROAD_F_oxysporum;Acc:FOXG_01675]
FOXG_02364	195.025	220.403	193.304	377.322	382.516	377.176	202.91	379.005	-0.901804	7.43161e-11	conserved hypothetical protein [Source:BROAD_F_oxysporum;Acc:FOXG_02364]
FOXG_15293	1160.91	1139.48	1089.02	319.341	359.283	639.247	1129.8	439.29	1.36534	7.75156e-11	hypothetical protein similar to glucose-methanol-choline oxidoreductase [Source:BROAD_F_oxysporum;Acc:FOXG_15293]
novel.604	104.697	66.1208	116.881	22.3003	22.4033	22.61	95.8998	22.4379	2.09604	7.76175e-11	-
FOXG_11088	5156.86	5048.33	5351.81	2896.37	3009.52	3661.79	5185.67	3189.23	0.701732	7.87055e-11	conserved hypothetical protein [Source:BROAD_F_oxysporum;Acc:FOXG_11088]
FOXG_09677	192.972	189.546	155.092	80.2812	63.891	51.3864	179.204	65.1862	1.45484	7.9048e-11	conserved hypothetical protein [Source:BROAD_F_oxysporum;Acc:FOXG_09677]
novel.64	95.4594	77.141	122.501	19.6243	24.8926	28.7764	98.367	24.4311	2.01404	7.91329e-11	-
FOXG_09507	1009	962.058	1006.98	352.345	451.386	596.082	992.677	466.604	1.09111	8.14623e-11	hypothetical protein [Source:BROAD_F_oxysporum;Acc:FOXG_09507]
FOXG_12883	1795.25	1605.63	1552.05	3884.72	3445.97	2487.1	1650.98	3272.6	-0.987297	8.23012e-11	protein SIK1 [Source:BROAD_F_oxysporum;Acc:FOXG_12883]
FOXG_11681	784.204	767.002	761.976	1314.83	1129.29	1245.61	771.061	1229.91	-0.673154	8.2781e-11	conserved hypothetical protein [Source:BROAD_F_oxysporum;Acc:FOXG_11681]
FOXG_12844	10159.8	10265.3	11625.2	6254.8	5895.4	7385.25	10683.4	6511.82	0.714413	8.51016e-11	hypothetical protein similar to stomatin family protein [Source:BROAD_F_oxysporum;Acc:FOXG_12844]
FOXG_07393	62.6131	61.7128	69.6792	6.24409	15.7653	10.2773	64.6684	10.7622	2.57569	8.58128e-11	conserved hypothetical protein [Source:BROAD_F_oxysporum;Acc:FOXG_07393]
FOXG_05210	485.508	497.008	477.64	289.012	285.435	260.015	486.719	278.154	0.805699	8.93467e-11	hypothetical protein similar to tyrosine decarboxylase [Source:BROAD_F_oxysporum;Acc:FOXG_05210]
FOXG_07591	141.649	132.242	124.748	256.9	277.967	285.708	132.88	273.525	-1.03992	8.94615e-11	hypothetical protein [Source:BROAD_F_oxysporum;Acc:FOXG_07591]
FOXG_05976	2105.24	2059.66	1882.46	3589.46	3397.84	2885.86	2015.79	3291.05	-0.707397	9.00513e-11	hydroxymethylglutaryl-CoA synthase [Source:BROAD_F_oxysporum;Acc:FOXG_05976]
FOXG_14774	237.109	201.669	157.34	512.016	450.556	381.287	198.706	447.953	-1.17188	9.13305e-11	conserved hypothetical protein [Source:BROAD_F_oxysporum;Acc:FOXG_14774]
FOXG_09330	679.507	640.27	588.902	1049.01	1035.53	984.563	636.226	1023.03	-0.684995	9.25805e-11	hypothetical protein similar to SUMO activating enzyme AosA [Source:BROAD_F_oxysporum;Acc:FOXG_09330]
FOXG_09402	23150.4	22599	23357.2	16527.2	15083.3	16780.7	23035.5	16130.4	0.51414	9.61087e-11	conserved hypothetical protein [Source:BROAD_F_oxysporum;Acc:FOXG_09402]
FOXG_01431	97.5123	63.9168	70.8031	205.163	185.865	205.546	77.4107	198.858	-1.35666	9.70657e-11	conserved hypothetical protein [Source:BROAD_F_oxysporum;Acc:FOXG_01431]
FOXG_01006	626.131	629.25	613.627	994.595	979.109	937.288	623.003	970.331	-0.639547	9.78418e-11	conserved hypothetical protein [Source:BROAD_F_oxysporum;Acc:FOXG_01006]
FOXG_03215	1612.54	1520.78	1461.02	931.262	1048.81	964.009	1531.45	981.36	0.64181	9.81448e-11	conserved hypothetical protein [Source:BROAD_F_oxysporum;Acc:FOXG_03215]
FOXG_05234	324.357	360.359	303.442	619.057	540.17	607.387	329.386	588.871	-0.837427	1.02092e-10	conserved hypothetical protein [Source:BROAD_F_oxysporum;Acc:FOXG_05234]
FOXG_09305	2303.34	2158.85	2273.57	946.426	953.387	1446.01	2245.25	1115.28	1.01069	1.02527e-10	conserved hypothetical protein [Source:BROAD_F_oxysporum;Acc:FOXG_09305]
FOXG_05208	1317.96	1356.58	1421.68	842.953	784.117	932.149	1365.41	853.073	0.679649	1.03277e-10	hypothetical protein [Source:BROAD_F_oxysporum;Acc:FOXG_05208]
FOXG_08455	7223.09	7120.11	6767.88	5082.69	4988.48	4702.88	7037.03	4924.68	0.51483	1.03358e-10	hypothetical protein similar to cytochrome c reductase iron-sulfur subunit [Source:BROAD_F_oxysporum;Acc:FOXG_08455]
FOXG_02222	2039.55	1970.4	2133.08	1324.64	1121	1367.91	2047.68	1271.18	0.688591	1.06199e-10	pH-response transcription factor pacC/RIM101 [Source:UniProtKB/Swiss-Prot;Acc:Q870A3]
FOXG_05175	204.263	257.871	227.019	525.396	444.748	411.091	229.718	460.412	-1.00477	1.06601e-10	hypothetical protein similar to phytanoyl-CoA dioxygenase family protein [Source:BROAD_F_oxysporum;Acc:FOXG_05175]
FOXG_09052	501.932	452.928	498.993	284.552	214.906	258.987	484.618	252.815	0.940433	1.07178e-10	conserved hypothetical protein [Source:BROAD_F_oxysporum;Acc:FOXG_09052]
FOXG_07891	2662.6	2540.14	3195.13	4496.64	4363.67	4773.8	2799.29	4544.7	-0.699144	1.07473e-10	predicted protein [Source:BROAD_F_oxysporum;Acc:FOXG_07891]
FOXG_08424	1324.11	1341.15	1314.91	1929.43	1910.92	1929.05	1326.73	1923.13	-0.535541	1.07542e-10	conserved hypothetical protein [Source:BROAD_F_oxysporum;Acc:FOXG_08424]
FOXG_06140	15763.1	14445.2	15879	1627.03	1684.4	3689.54	15362.4	2333.66	2.7189	1.08431e-10	hypothetical protein similar to siroheme synthase [Source:BROAD_F_oxysporum;Acc:FOXG_06140]
FOXG_05932	43.1107	33.0604	24.7249	105.258	121.144	118.189	33.632	114.863	-1.7661	1.08804e-10	conserved hypothetical protein [Source:BROAD_F_oxysporum;Acc:FOXG_05932]
FOXG_05117	1077.77	953.242	1011.47	2232.71	2088.49	1511.79	1014.16	1944.33	-0.939413	1.1069e-10	zinc knuckle domain protein [Source:BROAD_F_oxysporum;Acc:FOXG_05117]
FOXG_02163	409.552	435.296	414.704	684.174	668.781	705.021	419.85	685.992	-0.708055	1.1449e-10	histone acetyltransferase type B catalytic subunit [Source:BROAD_F_oxysporum;Acc:FOXG_02163]
novel.327	2231.49	2047.54	2424.16	1422.76	1485.26	1419.29	2234.4	1442.44	0.631124	1.15261e-10	PF09796:Ubiquinol-cytochrome-c reductase complex subunit (QCR10)
FOXG_01995	265.849	225.913	238.258	487.931	478.768	410.063	243.34	458.921	-0.915666	1.17515e-10	hypothetical protein similar to alpha-mannosidase [Source:BROAD_F_oxysporum;Acc:FOXG_01995]
novel.69	1909.19	1636.49	1861.11	883.985	795.734	1161.33	1802.26	947.017	0.92977	1.2046e-10	-
novel.81	17.4496	23.1423	17.9817	85.6333	69.6993	97.6342	19.5245	84.3222	-2.1089	1.21634e-10	-
FOXG_12690	197.077	228.117	222.524	413.002	392.473	531.335	215.906	445.604	-1.04409	1.2274e-10	conserved hypothetical protein [Source:BROAD_F_oxysporum;Acc:FOXG_12690]
FOXG_12296	86.2214	99.1813	98.8996	33.0045	19.0843	22.61	94.7674	24.8996	1.92837	1.24159e-10	conserved hypothetical protein [Source:BROAD_F_oxysporum;Acc:FOXG_12296]
FOXG_01690	1042.87	1014.95	984.5	1508.39	1518.45	1492.26	1014.11	1506.37	-0.570743	1.24442e-10	Fso1 [Source:UniProtKB/TrEMBL;Acc:A5YW23]
FOXG_00962	393.128	382.399	364.13	613.705	686.206	624.859	379.886	641.59	-0.756304	1.25384e-10	conserved hypothetical protein [Source:BROAD_F_oxysporum;Acc:FOXG_00962]
FOXG_04200	2395.72	2454.19	2342.12	1612.76	1715.93	1591.95	2397.34	1640.21	0.547188	1.25938e-10	hypothetical protein similar to cystathionine beta-lyase [Source:BROAD_F_oxysporum;Acc:FOXG_04200]
FOXG_01641	306.907	308.564	305.69	534.316	623.145	505.642	307.053	554.368	-0.853791	1.26842e-10	hypothetical protein similar to protein required for hyphal anastomosis [Source:BROAD_F_oxysporum;Acc:FOXG_01641]
FOXG_01679	1673.11	1911.99	1641.96	3737.54	3192.06	2622.76	1742.35	3184.12	-0.870173	1.27596e-10	conserved hypothetical protein [Source:BROAD_F_oxysporum;Acc:FOXG_01679]
FOXG_01817	632.29	586.271	537.204	911.638	970.812	1040.06	585.255	974.17	-0.733936	1.29913e-10	conserved hypothetical protein [Source:BROAD_F_oxysporum;Acc:FOXG_01817]
FOXG_03716	572.756	579.659	615.875	1059.71	994.874	881.791	589.43	978.792	-0.732731	1.32051e-10	hypothetical protein similar to CRAL/TRIO domain protein [Source:BROAD_F_oxysporum;Acc:FOXG_03716]
FOXG_08050	979.228	1023.77	1053.06	595.865	653.846	672.134	1018.68	640.615	0.669444	1.32561e-10	conserved hypothetical protein [Source:BROAD_F_oxysporum;Acc:FOXG_08050]
FOXG_00696	212.474	177.424	188.808	91.8774	77.1671	70.9132	192.902	79.9859	1.26843	1.35977e-10	conserved hypothetical protein [Source:BROAD_F_oxysporum;Acc:FOXG_00696]
FOXG_00627	1742.9	1775.34	1817.28	1208.68	1082	1218.89	1778.51	1169.85	0.604912	1.37735e-10	conserved hypothetical protein [Source:BROAD_F_oxysporum;Acc:FOXG_00627]
FOXG_03742	3243.57	2901.6	3137.81	4494.86	4846.59	5606.26	3094.33	4982.57	-0.686981	1.40279e-10	conserved hypothetical protein [Source:BROAD_F_oxysporum;Acc:FOXG_03742]
FOXG_00715	49.2694	56.2027	68.5554	12.4882	6.63803	7.1941	58.0091	8.77344	2.72145	1.41838e-10	hypothetical protein similar to allantoate permease [Source:BROAD_F_oxysporum;Acc:FOXG_00715]
FOXG_03312	1458.58	1456.86	1508.22	754.643	628.123	344.289	1474.55	575.685	1.35538	1.42271e-10	methylcrotonoyl-CoA carboxylase beta chain, mitochondrial precursor [Source:BROAD_F_oxysporum;Acc:FOXG_03312]
FOXG_01684	2541.48	2613.98	2416.3	3608.19	3615.24	3994.78	2523.92	3739.4	-0.566833	1.43663e-10	Two-component histidine kinase [Source:UniProtKB/TrEMBL;Acc:D0ES97]
FOXG_10318	624.079	672.229	658.581	1010.65	1000.68	1012.31	651.629	1007.88	-0.629476	1.43887e-10	conserved hypothetical protein [Source:BROAD_F_oxysporum;Acc:FOXG_10318]
novel.735	355.15	454.03	411.332	214.083	216.566	199.379	406.837	210.009	0.95203	1.44399e-10	-
novel.199	696.956	666.718	743.994	367.51	409.068	446.034	702.556	407.537	0.786859	1.44799e-10	PF00320:GATA zinc finger
FOXG_08289	4314.15	4572.26	4263.92	6534	6136.03	7249.59	4383.44	6639.87	-0.598903	1.46182e-10	conserved hypothetical protein [Source:BROAD_F_oxysporum;Acc:FOXG_08289]
FOXG_08083	127.279	114.609	103.395	269.388	222.374	287.764	115.095	259.842	-1.17117	1.48262e-10	hypothetical protein similar to zinc/iron transporter protein [Source:BROAD_F_oxysporum;Acc:FOXG_08083]
FOXG_05179	154.993	144.364	148.349	331.829	349.326	264.126	149.235	315.094	-1.08012	1.52951e-10	conserved hypothetical protein [Source:BROAD_F_oxysporum;Acc:FOXG_05179]
FOXG_04127	191.945	190.648	206.79	83.8493	93.7621	84.2737	196.461	87.295	1.168	1.57812e-10	conserved hypothetical protein [Source:BROAD_F_oxysporum;Acc:FOXG_04127]
FOXG_03252	151.914	165.302	186.561	318.449	333.561	330.928	167.925	327.646	-0.965818	1.59466e-10	conserved hypothetical protein [Source:BROAD_F_oxysporum;Acc:FOXG_03252]
FOXG_08370	1798.33	1757.71	2042.05	2843.74	3494.92	4293.85	1866.03	3544.17	-0.925287	1.6253e-10	predicted protein [Source:BROAD_F_oxysporum;Acc:FOXG_08370]
FOXG_07921	1827.07	2125.78	1673.43	3191.62	2913.26	3041.05	1875.43	3048.65	-0.700892	1.64186e-10	ribonucleoside-diphosphate reductase large chain [Source:BROAD_F_oxysporum;Acc:FOXG_07921]
FOXG_00319	1290.24	1270.62	1123.86	1900.88	1952.41	2373.02	1228.24	2075.44	-0.756065	1.6716e-10	conserved hypothetical protein [Source:BROAD_F_oxysporum;Acc:FOXG_00319]
FOXG_09345	3247.67	3269.68	3195.13	1459.33	1729.21	2160.28	3237.49	1782.94	0.861247	1.7188e-10	hypothetical protein similar to ATG1 protein [Source:BROAD_F_oxysporum;Acc:FOXG_09345]
FOXG_01651	104.697	88.1611	96.6518	305.069	227.352	200.407	96.5034	244.276	-1.34033	1.7253e-10	conserved hypothetical protein [Source:BROAD_F_oxysporum;Acc:FOXG_01651]
FOXG_01856	303.828	275.503	286.584	506.664	515.277	478.921	288.638	500.287	-0.793637	1.73998e-10	serine/threonine-protein kinase 6 [Source:BROAD_F_oxysporum;Acc:FOXG_01856]
FOXG_03909	48.2429	50.6926	38.2112	2.67604	3.31901	7.1941	45.7156	4.39638	3.41563	1.76099e-10	conserved hypothetical protein [Source:BROAD_F_oxysporum;Acc:FOXG_03909]
FOXG_16940	45.1636	45.1826	62.9361	0.892014	0.829753	1.02773	51.0941	0.916498	5.81017	1.76419e-10	conserved hypothetical protein [Source:BROAD_F_oxysporum;Acc:FOXG_16940]
FOXG_06204	1233.79	1060.14	1131.73	732.343	719.396	713.243	1141.88	721.661	0.662257	1.78339e-10	hypothetical protein [Source:BROAD_F_oxysporum;Acc:FOXG_06204]
FOXG_05898	49164.7	48917.3	47543.7	71395	79585.8	100778	48541.9	83919.6	-0.78976	1.86519e-10	hypothetical protein similar to fructose facilitator [Source:BROAD_F_oxysporum;Acc:FOXG_05898]
FOXG_00565	6874.1	6712.37	6853.29	4641.15	4723.79	3898.17	6813.25	4421.03	0.623647	1.86744e-10	hypothetical protein similar to calnexin [Source:BROAD_F_oxysporum;Acc:FOXG_00565]
FOXG_03404	2649.25	2471.82	2309.53	4008.71	3665.85	4752.21	2476.87	4142.26	-0.741443	1.95164e-10	conserved hypothetical protein [Source:BROAD_F_oxysporum;Acc:FOXG_03404]
FOXG_04178	7354.48	7204.97	7200.56	5083.59	4471.54	3869.4	7253.34	4474.84	0.696591	1.95358e-10	heat shock protein Hsp88 [Source:BROAD_F_oxysporum;Acc:FOXG_04178]
FOXG_10293	274.061	217.097	240.506	842.061	643.889	423.424	243.888	636.458	-1.38438	1.95358e-10	ATP-dependent RNA helicase DBP9 [Source:BROAD_F_oxysporum;Acc:FOXG_10293]
FOXG_10748	123.173	119.018	138.235	50.8448	43.1472	32.8873	126.809	42.2931	1.577	1.95563e-10	conserved hypothetical protein [Source:BROAD_F_oxysporum;Acc:FOXG_10748]
FOXG_08638	4898.2	5452.76	5767.64	9008.44	8129.92	7830.26	5372.87	8322.88	-0.631548	1.97461e-10	conserved hypothetical protein [Source:BROAD_F_oxysporum;Acc:FOXG_08638]
FOXG_09318	69.7983	78.243	56.1929	173.051	185.035	159.298	68.0781	172.461	-1.34148	1.99455e-10	conserved hypothetical protein [Source:BROAD_F_oxysporum;Acc:FOXG_09318]
FOXG_03359	5330.33	6066.59	6040.74	9567.74	8846.83	8268.07	5812.55	8894.21	-0.613857	2.02648e-10	hypothetical protein similar to Hsp70 family protein [Source:BROAD_F_oxysporum;Acc:FOXG_03359]
FOXG_00052	269.955	209.383	225.896	591.405	577.508	397.731	235.078	522.215	-1.15212	2.04026e-10	conserved hypothetical protein [Source:BROAD_F_oxysporum;Acc:FOXG_00052]
FOXG_07686	195.025	218.199	165.207	446.007	444.748	338.122	192.81	409.626	-1.08843	2.08981e-10	Putative uncharacterized protein FPD1 [Source:UniProtKB/TrEMBL;Acc:Q76C77]
FOXG_09159	1687.48	1784.16	1785.81	1011.54	1226.38	1049.31	1752.48	1095.74	0.676681	2.10747e-10	hypothetical protein similar to phosphatidylinositol transporter [Source:BROAD_F_oxysporum;Acc:FOXG_09159]
FOXG_06291	71.8511	85.9571	85.4133	9.81215	20.7438	22.61	81.0738	17.722	2.19914	2.13814e-10	predicted protein [Source:BROAD_F_oxysporum;Acc:FOXG_06291]
FOXG_14683	375.679	387.909	336.034	658.306	635.591	894.123	366.54	729.34	-0.990839	2.31699e-10	acid trehalase precursor [Source:BROAD_F_oxysporum;Acc:FOXG_14683]
FOXG_02916	84.1685	73.8349	80.9178	25.8684	13.2761	13.3605	79.6404	17.5016	2.18254	2.33074e-10	conserved hypothetical protein [Source:BROAD_F_oxysporum;Acc:FOXG_02916]
FOXG_00616	63.6396	62.8148	61.8122	158.778	165.121	144.91	62.7555	156.27	-1.31753	2.33248e-10	conserved hypothetical protein [Source:BROAD_F_oxysporum;Acc:FOXG_00616]
FOXG_03783	68.7718	61.7128	88.7848	19.6243	14.1058	12.3327	73.0898	15.3543	2.24463	2.40818e-10	conserved hypothetical protein [Source:BROAD_F_oxysporum;Acc:FOXG_03783]
FOXG_07892	12885	12955.3	13627.9	17898.3	18155	19382.9	13156	18478.7	-0.490113	2.44296e-10	hypothetical protein similar to CobW domain protein [Source:BROAD_F_oxysporum;Acc:FOXG_07892]
FOXG_05951	31.8198	48.4886	50.5736	1.78403	0	3.08318	43.6273	1.6224	4.82981	2.53387e-10	predicted protein [Source:BROAD_F_oxysporum;Acc:FOXG_05951]
FOXG_02258	237.109	191.75	224.772	493.283	471.3	997.924	217.877	654.169	-1.58437	2.54045e-10	conserved hypothetical protein [Source:BROAD_F_oxysporum;Acc:FOXG_02258]
FOXG_13367	403.393	452.928	433.809	204.271	259.713	208.629	430.043	224.204	0.93681	2.60295e-10	conserved hypothetical protein [Source:BROAD_F_oxysporum;Acc:FOXG_13367]
FOXG_05547	6843.31	6962.52	7305.08	4893.59	4701.38	5175.64	7036.97	4923.54	0.515416	2.60453e-10	hypothetical protein [Source:BROAD_F_oxysporum;Acc:FOXG_05547]
novel.468	225.818	207.179	261.859	99.9055	94.5919	116.133	231.619	103.544	1.16485	2.74384e-10	-
novel.76	361.309	292.034	371.997	180.187	169.27	140.799	341.78	163.418	1.06188	2.77419e-10	-
FOXG_00355	300.748	336.114	352.892	607.461	569.211	541.613	329.918	572.762	-0.797343	2.77434e-10	conserved hypothetical protein [Source:BROAD_F_oxysporum;Acc:FOXG_00355]
FOXG_08449	295.616	278.81	250.62	449.575	530.212	553.945	275.015	511.244	-0.893019	2.80486e-10	predicted protein [Source:BROAD_F_oxysporum;Acc:FOXG_08449]
FOXG_05010	1187.6	1216.62	1190.17	771.592	793.244	649.524	1198.13	738.12	0.697323	2.81865e-10	conserved hypothetical protein [Source:BROAD_F_oxysporum;Acc:FOXG_05010]
FOXG_03664	686.692	674.433	659.705	1040.98	999.853	1049.31	673.61	1030.05	-0.612217	2.84977e-10	hypothetical protein similar to mitochondrial carrier protein Rim2 [Source:BROAD_F_oxysporum;Acc:FOXG_03664]
FOXG_15719	140.623	112.405	156.216	295.256	306.179	494.337	136.415	365.258	-1.41872	2.85378e-10	conserved hypothetical protein [Source:BROAD_F_oxysporum;Acc:FOXG_15719]
novel.649	134.464	127.834	148.349	55.3048	48.1257	52.4141	136.882	51.9482	1.39881	2.86471e-10	-
FOXG_08319	2908.94	2746.22	2682.65	1760.83	1854.5	1428.54	2779.27	1681.29	0.724418	2.91752e-10	conserved hypothetical protein [Source:BROAD_F_oxysporum;Acc:FOXG_08319]
FOXG_03529	282.272	268.891	284.336	147.182	146.037	132.577	278.5	141.932	0.970604	2.92139e-10	conserved hypothetical protein [Source:BROAD_F_oxysporum;Acc:FOXG_03529]
novel.65	158.073	131.14	195.551	54.4128	66.3803	51.3864	161.588	57.3932	1.4884	2.93528e-10	-
FOXG_00732	56.4545	68.3249	77.5462	264.036	256.394	136.688	67.4419	219.039	-1.70425	3.0083e-10	predicted protein [Source:BROAD_F_oxysporum;Acc:FOXG_00732]
novel.529	101.618	89.2631	89.9087	24.9764	32.3604	24.6655	93.5966	27.3341	1.7702	3.08896e-10	PF13639:Ring finger domain
FOXG_07273	11.2909	20.9383	23.601	76.7132	74.6778	110.995	18.6101	87.4619	-2.23699	3.09052e-10	conserved hypothetical protein [Source:BROAD_F_oxysporum;Acc:FOXG_07273]
FOXG_00182	314.092	316.278	277.593	161.454	131.931	158.27	302.654	150.552	1.01022	3.18716e-10	conserved hypothetical protein [Source:BROAD_F_oxysporum;Acc:FOXG_00182]
FOXG_03096	1226.6	1151.6	1056.43	2117.64	1774.84	1756.39	1144.88	1882.96	-0.717649	3.23518e-10	conserved hypothetical protein [Source:BROAD_F_oxysporum;Acc:FOXG_03096]
FOXG_00178	867.346	778.022	723.765	1426.33	1309.35	1198.33	789.711	1311.34	-0.731531	3.25863e-10	hypothetical protein similar to pre-mRNA splicing helicase [Source:BROAD_F_oxysporum;Acc:FOXG_00178]
FOXG_11380	202.21	173.016	178.694	61.5489	57.253	91.4678	184.64	70.0899	1.40711	3.35908e-10	conserved hypothetical protein [Source:BROAD_F_oxysporum;Acc:FOXG_11380]
FOXG_07493	207.342	146.568	177.57	366.618	407.409	674.19	177.16	482.739	-1.44356	3.36719e-10	conserved hypothetical protein [Source:BROAD_F_oxysporum;Acc:FOXG_07493]
FOXG_03288	2986.95	2687.81	2592.74	4154.11	3996.92	4052.33	2755.84	4067.79	-0.561514	3.36911e-10	conserved hypothetical protein [Source:BROAD_F_oxysporum;Acc:FOXG_03288]
FOXG_09822	322.304	283.218	282.089	127.558	156.823	153.131	295.87	145.838	1.02159	3.37617e-10	hypothetical protein similar to light regulation of gametogenesis6 protein [Source:BROAD_F_oxysporum;Acc:FOXG_09822]
FOXG_01091	2916.13	3085.64	2907.42	2091.77	2029.58	1809.83	2969.73	1977.06	0.586451	3.42111e-10	predicted protein [Source:BROAD_F_oxysporum;Acc:FOXG_01091]
FOXG_11000	4184.82	4218.51	4702.22	2995.38	2452.75	2199.34	4368.52	2549.16	0.776799	3.50537e-10	hypothetical protein similar to flotillin domain protein [Source:BROAD_F_oxysporum;Acc:FOXG_11000]
FOXG_03516	135.491	100.283	102.271	313.989	281.286	219.934	112.682	271.736	-1.26954	3.51375e-10	conserved hypothetical protein [Source:BROAD_F_oxysporum;Acc:FOXG_03516]
FOXG_04342	453.689	395.623	432.686	784.08	843.03	657.746	427.332	761.618	-0.834647	3.5412e-10	conserved hypothetical protein [Source:BROAD_F_oxysporum;Acc:FOXG_04342]
FOXG_00439	2715.97	3047.07	2797.28	1930.32	1822.14	1995.85	2853.44	1916.1	0.574797	3.54486e-10	protein yabJ [Source:BROAD_F_oxysporum;Acc:FOXG_00439]
FOXG_08291	792.415	686.555	710.279	454.927	445.578	400.814	729.75	433.773	0.749693	3.55677e-10	conserved hypothetical protein [Source:BROAD_F_oxysporum;Acc:FOXG_08291]
FOXG_01172	1891.74	2088.32	1917.3	3328.1	3208.66	2750.2	1965.79	3095.65	-0.655557	3.61723e-10	eukaryotic translation initiation factor 4E-1 [Source:BROAD_F_oxysporum;Acc:FOXG_01172]
FOXG_02813	270.981	257.871	321.424	102.582	113.676	153.131	283.425	123.13	1.20747	3.68871e-10	conserved hypothetical protein [Source:BROAD_F_oxysporum;Acc:FOXG_02813]
FOXG_12364	1308.72	1203.4	1171.06	1778.68	1871.92	1855.05	1227.73	1835.22	-0.579583	3.69393e-10	conserved hypothetical protein [Source:BROAD_F_oxysporum;Acc:FOXG_12364]
FOXG_00833	617.92	675.535	728.26	398.73	349.326	264.126	673.905	337.394	0.99541	3.73109e-10	hypothetical protein similar to uracil DNA glycosylase superfamily protein [Source:BROAD_F_oxysporum;Acc:FOXG_00833]
FOXG_12783	3080.36	2936.87	2727.6	4338.75	4342.1	4088.3	2914.94	4256.39	-0.546129	3.73157e-10	conserved hypothetical protein [Source:BROAD_F_oxysporum;Acc:FOXG_12783]
FOXG_07871	781.125	911.366	823.788	1407.6	1362.46	1243.55	838.759	1337.87	-0.674401	3.81291e-10	conserved hypothetical protein [Source:BROAD_F_oxysporum;Acc:FOXG_07871]
FOXG_01834	964.858	909.162	894.591	1366.56	1441.28	1355.57	922.87	1387.81	-0.588597	3.82911e-10	hypothetical protein similar to KH domain RNA-binding protein [Source:BROAD_F_oxysporum;Acc:FOXG_01834]
FOXG_11413	75.9569	62.8148	41.5828	8.92014	9.95704	10.2773	60.1182	9.71815	2.63315	3.8393e-10	conserved hypothetical protein [Source:BROAD_F_oxysporum;Acc:FOXG_11413]
FOXG_05282	297.669	286.524	312.433	509.34	492.044	585.805	298.875	529.063	-0.822564	3.88548e-10	hypothetical protein similar to quinone oxidoreductase [Source:BROAD_F_oxysporum;Acc:FOXG_05282]
FOXG_17719	27.714	35.2644	29.2203	106.15	87.1241	147.993	30.7329	113.756	-1.88485	3.92044e-10	conserved hypothetical protein [Source:BROAD_F_oxysporum;Acc:FOXG_17719]
FOXG_01728	702.088	751.574	797.94	1220.27	1143.4	1140.78	750.534	1168.15	-0.638855	3.9308e-10	conserved hypothetical protein [Source:BROAD_F_oxysporum;Acc:FOXG_01728]
FOXG_03069	189.892	208.281	225.896	360.373	391.644	428.563	208.023	393.527	-0.91982	3.97824e-10	conserved hypothetical protein [Source:BROAD_F_oxysporum;Acc:FOXG_03069]
FOXG_01777	1108.56	1144.99	1033.95	1718.02	1749.12	1563.17	1095.83	1676.77	-0.614031	4.00601e-10	hypothetical protein similar to 6-phosphogluconolactonase [Source:BROAD_F_oxysporum;Acc:FOXG_01777]
FOXG_10517	4307.99	4275.81	4951.72	2756.32	2686.74	3154.1	4511.84	2865.72	0.655113	4.00836e-10	conserved hypothetical protein [Source:BROAD_F_oxysporum;Acc:FOXG_10517]
FOXG_06195	1254.32	1407.27	1543.06	894.69	860.454	865.347	1401.55	873.497	0.681714	4.0402e-10	conserved hypothetical protein [Source:BROAD_F_oxysporum;Acc:FOXG_06195]
FOXG_15733	157.046	114.609	150.597	48.1687	47.2959	56.525	140.751	50.6632	1.47891	4.04969e-10	hypothetical protein similar to caleosin domain protein [Source:BROAD_F_oxysporum;Acc:FOXG_15733]
FOXG_03744	2624.62	2716.46	2789.42	3968.57	3905.65	4686.44	2710.17	4186.89	-0.627243	4.09156e-10	conserved hypothetical protein [Source:BROAD_F_oxysporum;Acc:FOXG_03744]
FOXG_13027	32.8462	40.7745	44.9543	2.67604	2.48926	1.02773	39.525	2.06434	4.22494	4.1087e-10	predicted protein [Source:BROAD_F_oxysporum;Acc:FOXG_13027]
FOXG_11240	3901.52	3446	3522.17	2271.07	2405.46	2550.82	3623.23	2409.11	0.589156	4.13195e-10	hypothetical protein [Source:BROAD_F_oxysporum;Acc:FOXG_11240]
FOXG_09616	214.527	231.423	221.4	91.8774	116.165	77.0796	222.45	95.0408	1.22003	4.13201e-10	conserved hypothetical protein [Source:BROAD_F_oxysporum;Acc:FOXG_09616]
FOXG_01801	322.304	341.624	314.68	515.584	570.87	614.581	326.203	567.012	-0.796785	4.24169e-10	conserved hypothetical protein [Source:BROAD_F_oxysporum;Acc:FOXG_01801]
FOXG_03302	11192.4	11124.8	11779.2	5688.37	6340.98	7951.53	11365.4	6660.29	0.771182	4.26523e-10	hypothetical protein similar to RING-9 protein [Source:BROAD_F_oxysporum;Acc:FOXG_03302]
FOXG_11023	10546.7	10273	11168.9	16616.4	17449.7	24407.5	10662.9	19491.2	-0.870163	4.2925e-10	hypothetical protein [Source:BROAD_F_oxysporum;Acc:FOXG_11023]
FOXG_03698	927.906	949.936	942.917	1374.59	1415.56	1363.79	940.253	1384.65	-0.558705	4.29571e-10	conserved hypothetical protein [Source:BROAD_F_oxysporum;Acc:FOXG_03698]
FOXG_13852	5817.89	5524.4	5791.24	3214.82	3328.97	4104.75	5711.18	3549.51	0.686566	4.29699e-10	serine/threonine-protein kinase nrc-2 [Source:BROAD_F_oxysporum;Acc:FOXG_13852]
FOXG_00763	1583.8	1721.35	1613.86	1145.35	1087.81	1061.64	1639.67	1098.27	0.577802	4.42594e-10	conserved hypothetical protein [Source:BROAD_F_oxysporum;Acc:FOXG_00763]
FOXG_09875	199.13	175.22	234.886	61.5489	95.4216	78.1073	203.079	78.3593	1.37117	4.44918e-10	conserved hypothetical protein [Source:BROAD_F_oxysporum;Acc:FOXG_09875]
FOXG_01532	2159.64	2177.58	2131.96	3659.93	3323.99	2986.58	2156.39	3323.5	-0.624351	4.4932e-10	cell division control protein 12 [Source:BROAD_F_oxysporum;Acc:FOXG_01532]
FOXG_06054	472.165	466.152	449.543	287.228	250.586	257.96	462.62	265.258	0.80262	4.50154e-10	conserved hypothetical protein [Source:BROAD_F_oxysporum;Acc:FOXG_06054]
FOXG_06282	2402.91	2319.74	2472.49	1550.32	1585.66	1230.19	2398.38	1455.39	0.719741	4.53854e-10	isocitrate dehydrogenase subunit 2, mitochondrial precursor [Source:BROAD_F_oxysporum;Acc:FOXG_06282]
FOXG_02289	1733.67	1727.96	1816.16	1171.21	1240.48	1085.28	1759.26	1165.66	0.592916	4.57614e-10	conserved hypothetical protein [Source:BROAD_F_oxysporum;Acc:FOXG_02289]
FOXG_13538	187.839	163.098	219.152	382.674	369.24	355.594	190.03	369.169	-0.959036	4.63241e-10	conserved hypothetical protein [Source:BROAD_F_oxysporum;Acc:FOXG_13538]
FOXG_09342	290.484	213.791	223.648	663.658	608.209	414.174	242.641	562.014	-1.21198	4.64238e-10	conserved hypothetical protein [Source:BROAD_F_oxysporum;Acc:FOXG_09342]
FOXG_00023	296.643	284.32	292.203	563.753	482.917	486.115	291.055	510.928	-0.811907	4.65373e-10	hypothetical protein similar to ATP-dependent RNA helicase Hrh1 [Source:BROAD_F_oxysporum;Acc:FOXG_00023]
FOXG_00490	196.051	152.078	157.34	436.195	384.176	300.097	168.49	373.489	-1.14852	4.73907e-10	conserved hypothetical protein [Source:BROAD_F_oxysporum;Acc:FOXG_00490]
FOXG_02799	124.2	127.834	104.519	49.0607	28.2116	29.8041	118.851	35.6922	1.73434	4.75879e-10	conserved hypothetical protein [Source:BROAD_F_oxysporum;Acc:FOXG_02799]
FOXG_04239	1772.67	1863.51	1658.82	1154.27	1218.08	1068.84	1765	1147.06	0.621034	4.8204e-10	conserved hypothetical protein [Source:BROAD_F_oxysporum;Acc:FOXG_04239]
FOXG_03703	758.543	722.921	640.599	427.274	385.006	437.812	707.354	416.697	0.765113	4.8262e-10	DNA repair and recombination protein RAD54 [Source:BROAD_F_oxysporum;Acc:FOXG_03703]
FOXG_08286	663.083	646.882	637.228	376.43	412.387	410.063	649.064	399.627	0.70006	4.83478e-10	protein NBP35 [Source:BROAD_F_oxysporum;Acc:FOXG_08286]
FOXG_12380	159.099	203.873	193.304	53.5208	74.6778	84.2737	185.425	70.8241	1.39128	4.87025e-10	conserved hypothetical protein [Source:BROAD_F_oxysporum;Acc:FOXG_12380]
FOXG_04985	1098.3	995.119	1077.78	454.035	586.636	665.968	1057.07	568.879	0.895114	4.90804e-10	hypothetical protein similar to golgi integral membrane protein Cln3 [Source:BROAD_F_oxysporum;Acc:FOXG_04985]
FOXG_09395	681.559	689.861	702.412	1050.79	1021.43	1061.64	691.277	1044.62	-0.595521	5.03695e-10	conserved hypothetical protein [Source:BROAD_F_oxysporum;Acc:FOXG_09395]
FOXG_08332	1213.26	1323.52	1405.95	836.709	868.752	745.103	1314.24	816.854	0.684722	5.08925e-10	conserved hypothetical protein [Source:BROAD_F_oxysporum;Acc:FOXG_08332]
novel.363	254.558	272.197	258.487	521.828	511.128	415.202	261.748	482.719	-0.884876	5.15856e-10	-
FOXG_02901	159.099	192.852	216.905	60.6569	73.0183	88.3846	189.619	74.0199	1.36041	5.21124e-10	predicted protein [Source:BROAD_F_oxysporum;Acc:FOXG_02901]
FOXG_00013	469.085	446.316	412.456	786.756	698.652	714.271	442.619	733.226	-0.727603	5.21605e-10	hypothetical protein similar to calcium channel subunit Cch1 [Source:BROAD_F_oxysporum;Acc:FOXG_00013]
FOXG_08752	100.592	110.201	104.519	247.088	225.693	204.518	105.104	225.766	-1.10492	5.25959e-10	hypothetical protein similar to methyltransferase [Source:BROAD_F_oxysporum;Acc:FOXG_08752]
FOXG_06354	163.205	165.302	144.978	421.03	321.115	290.847	157.828	344.331	-1.126	5.28072e-10	conserved hypothetical protein [Source:BROAD_F_oxysporum;Acc:FOXG_06354]
FOXG_01486	1561.22	1704.82	1619.48	1038.3	1082	1139.75	1628.51	1086.68	0.583942	5.44467e-10	conserved hypothetical protein [Source:BROAD_F_oxysporum;Acc:FOXG_01486]
FOXG_05317	1383.65	1532.9	1412.69	2153.32	2203	2659.76	1443.08	2338.69	-0.696133	5.47643e-10	hypothetical protein similar to mannan polymerase II complex ANP1 subunit [Source:BROAD_F_oxysporum;Acc:FOXG_05317]
FOXG_10267	2219.17	2199.62	2244.35	1237.22	1528.41	1091.45	2221.05	1285.69	0.787664	5.64844e-10	hypothetical protein [Source:BROAD_F_oxysporum;Acc:FOXG_10267]
FOXG_09173	1856.84	2107.05	2327.51	1316.61	1044.66	842.737	2097.13	1068	0.972678	5.73637e-10	conserved hypothetical protein [Source:BROAD_F_oxysporum;Acc:FOXG_09173]
FOXG_10466	3985.69	3746.85	4249.31	1923.18	2123.34	2732.73	3993.95	2259.75	0.822173	5.82357e-10	conserved hypothetical protein [Source:BROAD_F_oxysporum;Acc:FOXG_10466]
FOXG_03727	2084.71	1907.59	1997.1	1228.3	1329.27	1405.93	1996.46	1321.17	0.596201	5.8746e-10	White collar 1 [Source:UniProtKB/TrEMBL;Acc:A9Z0Q2]
FOXG_11307	2700.58	2712.06	2816.39	1920.51	1991.41	1902.32	2743.01	1938.08	0.500846	6.0772e-10	conserved hypothetical protein [Source:BROAD_F_oxysporum;Acc:FOXG_11307]
FOXG_06350	29514.4	30704.3	32477.3	16812.7	16676.4	22002.6	30898.7	18497.2	0.740308	6.1339e-10	pyridoxamine 5'-phosphate oxidase [Source:BROAD_F_oxysporum;Acc:FOXG_06350]
FOXG_17651	17.4496	9.91813	7.86701	68.685	61.4018	62.6914	11.7449	64.2594	-2.43998	6.14336e-10	conserved hypothetical protein [Source:BROAD_F_oxysporum;Acc:FOXG_17651]
FOXG_12733	3863.54	3540.77	4013.3	2156	2251.95	2693.67	3805.87	2367.21	0.685534	6.18181e-10	conserved hypothetical protein [Source:BROAD_F_oxysporum;Acc:FOXG_12733]
FOXG_04304	36.952	42.9785	65.1838	8.02812	3.31901	2.05546	48.3715	4.46753	3.41711	6.1824e-10	hypothetical protein similar to conserved protein [Source:BROAD_F_oxysporum;Acc:FOXG_04304]
FOXG_06956	68.7718	65.0188	43.8305	171.267	175.078	139.771	59.207	162.039	-1.45142	6.18396e-10	predicted protein [Source:BROAD_F_oxysporum;Acc:FOXG_06956]
FOXG_03313	557.36	527.865	502.365	265.82	208.268	115.106	529.196	196.398	1.4265	6.28767e-10	isovaleryl-CoA dehydrogenase, mitochondrial precursor [Source:BROAD_F_oxysporum;Acc:FOXG_03313]
FOXG_00864	303.828	232.525	261.859	771.592	726.864	433.701	266.071	644.052	-1.27607	6.31623e-10	conserved hypothetical protein [Source:BROAD_F_oxysporum;Acc:FOXG_00864]
FOXG_09192	535.804	513.538	547.319	219.435	262.202	329.901	532.221	270.513	0.979292	6.31637e-10	conserved hypothetical protein [Source:BROAD_F_oxysporum;Acc:FOXG_09192]
FOXG_08004	2653.36	2684.51	2871.46	1697.5	1708.46	1976.32	2736.44	1794.09	0.609593	6.34237e-10	hypothetical protein similar to ubiquitin fusion degradation protein [Source:BROAD_F_oxysporum;Acc:FOXG_08004]
FOXG_04463	33.8727	38.5705	57.3168	4.46007	4.14877	3.08318	43.2533	3.89734	3.45871	6.36121e-10	conserved hypothetical protein [Source:BROAD_F_oxysporum;Acc:FOXG_04463]
FOXG_06303	135.491	176.322	130.368	51.7368	59.7422	53.4419	147.394	54.9736	1.4206	6.37344e-10	conserved hypothetical protein [Source:BROAD_F_oxysporum;Acc:FOXG_06303]
FOXG_03361	350.018	403.337	386.607	816.192	732.672	588.888	379.987	712.584	-0.908747	6.4288e-10	conserved hypothetical protein [Source:BROAD_F_oxysporum;Acc:FOXG_03361]
FOXG_05240	1205.05	1149.4	1018.22	1817.92	1820.48	2450.1	1124.22	2029.5	-0.851363	6.63604e-10	hypothetical protein [Source:BROAD_F_oxysporum;Acc:FOXG_05240]
FOXG_00633	531.698	488.192	415.828	812.624	811.499	1025.67	478.573	883.265	-0.882334	6.7202e-10	conserved hypothetical protein [Source:BROAD_F_oxysporum;Acc:FOXG_00633]
FOXG_06112	3458.09	3571.63	3679.51	1893.74	1920.88	2522.04	3569.74	2112.22	0.757685	6.97396e-10	hypothetical protein [Source:BROAD_F_oxysporum;Acc:FOXG_06112]
FOXG_00429	163.205	184.036	155.092	333.613	342.688	295.986	167.445	324.096	-0.95425	7.03094e-10	conserved hypothetical protein [Source:BROAD_F_oxysporum;Acc:FOXG_00429]
FOXG_00096	1673.11	1837.06	1717.26	3358.43	2762.25	2555.96	1742.47	2892.21	-0.731325	7.14116e-10	conserved hypothetical protein [Source:BROAD_F_oxysporum;Acc:FOXG_00096]
FOXG_00102	267.902	273.299	307.937	545.02	482.087	473.783	283.046	500.297	-0.822866	7.22043e-10	hypothetical protein similar to exochitinase [Source:BROAD_F_oxysporum;Acc:FOXG_00102]
FOXG_03068	1641.29	1348.87	1336.27	2232.71	2297.59	2316.5	1442.14	2282.27	-0.661741	7.29917e-10	hypothetical protein similar to GTPase activating protein Gyp2 [Source:BROAD_F_oxysporum;Acc:FOXG_03068]
FOXG_02155	599.444	503.62	543.948	1355.86	1135.1	846.848	549.004	1112.6	-1.0195	7.31303e-10	conserved hypothetical protein [Source:BROAD_F_oxysporum;Acc:FOXG_02155]
FOXG_16819	1071.61	1037	1053.06	703.799	698.652	710.16	1053.89	704.204	0.581918	7.39679e-10	conserved hypothetical protein [Source:BROAD_F_oxysporum;Acc:FOXG_16819]
FOXG_07900	1711.08	1525.19	1378.97	2515.48	2422.88	3203.43	1538.42	2713.93	-0.818239	7.56778e-10	conserved hypothetical protein [Source:BROAD_F_oxysporum;Acc:FOXG_07900]
FOXG_07791	377.732	514.641	456.287	864.361	756.735	798.545	449.553	806.547	-0.84409	7.63245e-10	conserved hypothetical protein [Source:BROAD_F_oxysporum;Acc:FOXG_07791]
FOXG_11315	36.952	34.1624	51.6975	0	3.31901	1.02773	40.9373	1.44891	4.76519	7.76636e-10	predicted protein [Source:BROAD_F_oxysporum;Acc:FOXG_11315]
[truncated: 3,993 more rows]
