# Supplementary material for: The decrotonylase FoSir5 facilitates mitochondrial metabolic state switching in conidial germination of Fusarium oxysporum
Source: eLife. 2021 Dec 20;10:e75583. doi: 10.7554/eLife.75583 (PMC8730727; doi:10.7554/eLife.75583)
Supplement: Supplementary file 3. [file elife-75583-supp3.xlsx]

## Sheet: Sheet1
Primer	Sequence (5'-3')	Relevant characteristics
FoSIRT5-UP-F	GCAAGAGCCTCAAGTTGGTC	FoSIRT5 deletion
FoSIRT5-UP-R	GACCTCCACTAGCTCCAGCCAAGCC CGTCGTTATGAGGAGCCATT
FoSIRT5-Down-F	ATAGAGTAGATGCCGACCGCGGGTT CTCTGCTCTTGGAGCCTGTT
FoSIRT5-Down-R	CGGATGTGGTGCCTTCTACT
FoSIRT5-In-F	GGAGCTGGTCTCTCAGCATC
FoSIRT5-In-R	GTGAGATTGGGTCCAGAGGA
FoSIRT5-Out-F	CGGCCGGTCTGTGTATAAGT
FoSIRT5-Out-R	AGAATACGGTTGCGGATTTG
FoSIRT5-K-F	TGAGCCTCCTCCAGATACAG
FoSIRT5-K-R	CATGTTGAAG CCCTGCATCT
FoDLAT-UP-F	GATCATGAGTTGGCACTG	FoDLAT deletion
FoDLAT-UP-R	GACCTCCACTAGCTCCAGCCAAGCCGGAGATGTTAGTCGGTGATG
FoDLAT-Down-F	ATAGAGTAGATGCCGACCGCGGGTTAGAACAGGAGGAGATGAC
FoDLAT-Down-R	CAAGAAGTCAGAGGAGCA
FoDLAT-In-F	GTCTCTGTTGCCGTTTCCAC
FoDLAT-In-R	AAAGTCATTCCTCGCTCGAC
FoDLAT-Out-F	ATCCAACCCCAAGAATTTCC
FoDLAT-Out-R	CGCACAGACCAAGCTATTGA
FoDLAT-K-F	GAAGTCGTCAAGGGTCT
FoDLAT-K-R	TCCAAAGTGCGCAGACT
FoSIRT5-C-F	ACTCACTATAGGGCGAATTGGGTACTCAAATTGGTTGTAGTAACCATCACTCCCGA	FoSIRT5 complementation
FoSIRT5-C-R	CACCACCCCGGTGAACAGCTCCTCGCCCTTGCTCACAGATCTTTCCTTCTTGTCTG
FoDLAT-C-F	ACTCACTATAGGGCGAATTGGGTACTCAAATTGGTTATCGATCCTGATGAGCCGG	FoDLAT-K148Q/R complementation
FoDLAT-C-Q-R	ACTCGGACTGGGACTC
FoDLAT-C-Q-F	GAGTCCCAGTCCGAGT
FoDLAT-C-R-R	ACTCGGATCTGGACTC
FoDLAT-C-R-F	GAGTCCAGATCCGAGT
FoDLAT-C-R	CACCACCCCGGTGAACAGCTCCTCGCCCTTGCTCACCAGAAGAAGCTCAAGAG
FoSIRT5-Flag-F	TTTCGTAGGAACCCAATCTTCAAA ATGGCTCCTCATAACGA	Gene overexpression
FoSIRT5-Flag-R	CTTTATAATCACCGTCATGGTCTTTGTAGTC AGATCTTTCCTTCTTGTCTG
FoMDH-GFP-F	TTTCGTAGGAACCCAATCTTCAAA ATGTTCGCCGCTTCTCG
FoMDH-GFP-R	CACCACCCCGGTGAACAGCTCCTCGCCCTTGCTCAC TTTGGGAGGGTTGGAG
FoATP5H-GFP-F	TTTCGTAGGAACCCAATCTTCAAA ATGGCGACT CGAAGCGCAGCTCTCAAG
FoATP5H-GFP-R	CACCACCCCGGTGAACAGCTCCTCGCCCTTGCTCAC AACCACAGCCAAGTCGC
FoCYC1-GFP-F	TTTCGTAGGAACCCAATCTTCAAA ATGCTTGCCAGGTCGTG
FoCYC1-GFP-R	CACCACCCCGGTGAACAGCTCCTCGCCCTTGCTCAC GCGGCGGACCTTGACCT
FoDLAT-flag-F	TTTCGTAGGAACCCAATCTTCAAA ATGCTCAGCGCCGCTCTCCGAAG
FoDLAT-flag-R	CTTTATAATCACCGTCATGGTCTTTGTAGTC CAGAAGAAGCTCAAGAGGGTTC
FoSIRT5-GFP-F	TTTCGTAGGAACCCAATCTTCAAA ATGGCTCCTCATAACGA
FoSIRT5-GFP-R	CACCACCCCGGTGAACAGCTCCTCGCCCTTGCTCAC AGATCTTTCCTTCTTGTCTG
FoDLAT-GFP-F	TTTCGTAGGAACCCAATCTTCAAA ATGCTCAGCGCCGCTCTCCGAAG
FoDLAT-GFP-R	CACCACCCCGGTGAACAGCTCCTCGCCCTTGCTCAC CAGAAGAAGCTCAAGAGGGTTC
FoSIRT5-pET28-F	ATGGGTCGCGGATCCGAATTC ATGGCTCCTCATAACGA	His
FoSIRT5-pET28-R	CTTGTCGACGGAGCTCGAATTC AGATCTTTCCTTCTTGTCTG
FoDLAT-pMAL-F	ATCGAGGGAAGGATTTCAGAATTC ATGCTCAGCGCCGCTCTCCGAAG	MBP
FoDLAT-pMAL-R	GTCGACTCTAGAGGATCCGAATTC TTACAGAAGAAGCTCAAGAGGGTTC
FoSIRT5-F	TCCTCTGGACCCAATCTCAC	FoSIRT5 for qPCR
FoSIRT5-R	TTGTCCTCGAGAAGCCAGTT
FoNDH8-F	GCCGAACAACCAAGTACGAT	FOXG_04085 for qPCR
FoNDH8-R	CTCAGGCTCCCACTTGTCTC
FoIDH2-F	GAACATGTTGTCGTCGATGG	FOXG_06282 for qPCR
FoIDH2-R	CAACCTCTTGGGCAACCTTA
FoMDH-F	TGCTGATATTTCCCACGTCA	FOXG_10419 for qPCR
FoMDH-R	GTAGAGTTGACGGGGTTGGA
FoSDH-F	TCCGACGTCAAGATCTACCC	FOXG_09278 for qPCR
FoSDH-R	TGCACTCGTAGAGACCATCG
FoATP5H-F	GTACCGATCCGTCCTCAAGA	FOXG_03373 for qPCR
FoATP5H-R	TCGAGCCTCCTCAATGTTCT
FoNDHB1-F	TCCTGCTCTTCGACAGGTTT	FOXG_05196 for qPCR
FoNDHB1-R	GTCGGGTAATGCGAGTTTGT
FoCYC1-F	ATCCCCTACCGAACTCTCGT	FOXG_00494 for qPCR
FoCYC1-R	GACGGGCCTTGATGATAAGA
FoCYBS-F	TACTCTCGACGCCATCCTCT	FOXG_01074 for qPCR
FoCYBS-R	AGTCCAACACCAACGAGGAC
FoEF-1α -F	ACCTCATTGTCGCCAT	Reference gene for qPCR
FoEF-1α -R	TGATCTCACGCTCCCAA
FoNDH8-ChIP-F	GGAAACGGCTGAAATACCAA	FOXG_04085 for ChIP-qPCR
FoNDH8-ChIP-R	CTCGTGACTTTGCACGTGAT
FoIDH2-ChIP-F	TGACGTGCATTTCTGTGGTT	FOXG_06282 for ChIP-qPCR
FoIDH2-ChIP-R	CTTTTTCGCGCCTTTTACAG
FoMDH-ChIP-F	TGGGTCCATAAATCCAGCAT	FOXG_10419 for ChIP-qPCR
FoMDH-ChIP-R	CACTTCGTCTAGGCCCTCTG
FoSDH-ChIP-F	GCCGTAGGTCCCAGTGTAAA	FOXG_09278 for ChIP-qPCR
FoSDH-ChIP-R	GTTGGAGCTGTGGTCAGACA
FoATP5H-ChIP-F	CTCGCCAATGATCAGCTTTT	FOXG_03373 for ChIP-qPCR
FoATP5H-ChIP-R	TCGAGAGAGCGGAGAGGATA
FoNDHB1-ChIP-F	CAGAGTGTGAGGCAAAACGA	FOXG_05196 for ChIP-qPCR
FoNDHB1-ChIP-R	CCTCGGGGGACCTTAGTTAG
FoCYC1-ChIP-F	AATGGTCATGACTCGCTTCC	FOXG_00494 for ChIP-qPCR
FoCYC1-ChIP-R	CCAGGTGACTTCCGATGAGT
FoCYBS-ChIP-F	GGCAATGGTAGGACATCCAG	FOXG_01074 for ChIP-qPCR
FoCYBS-ChIP-R	GCCATTTTGAAGCGTTGAAT
FoTub-ChIP-F	TCTCTGACACCGTCGTTGAG	β-tubulin for ChIP-qPCR
FoTub-ChIP-R	AAACGGAGACAGGTGGTGAC
FoACTIN-3'utr-F	GGGGAGGCTTCTTGCTAACT	ACTIN negative control for ChIP-qPCR
FoACTIN-3'utr-R	TACCCCTAGGCACGCATTAC
SlRCE1-F	GGAAGCCTGTGCTCAACATT	Reference gene for qPCR in tomato
SlRCE1-R	TACATGCAACGGGTGAAGAA
